# Supplementary material for: Functionalization of diazotetronic acid and application in a stereoselective modular synthesis of pulvinone, aspulvinones A–E, G, Q and their analogues
Source: Royal Society of Chemistry journal article supplement (doi:10.1039/c8ob01511b), 2018-01-01

## Supplementary Information

### Functionalization of Diazotetronic Acid and Application in a Stereoselective Modular Synthesis of Pulvinone, Aspulvinones A-E, G, Q and their Analogues

Amarender Manchoju, Ritesh A. Annadate, Lise Desquien and Sunil V. Pansare\*

Department of Chemistry, Memorial University of Newfoundland

St. John's, Newfoundland, Canada A1B 3X7

<sup>1</sup>H and <sup>13</sup>C Spectra.....2-40

AM-11-111

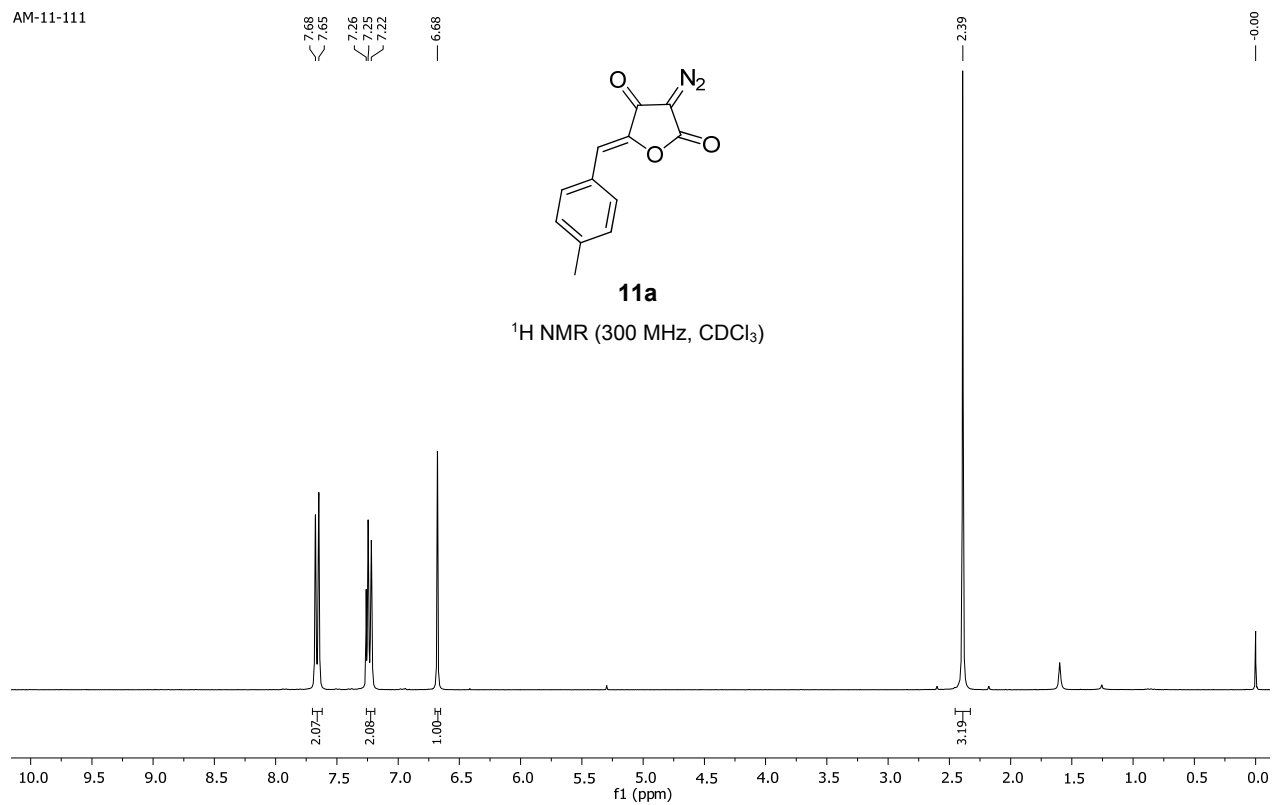

AM-11-111  
174.82

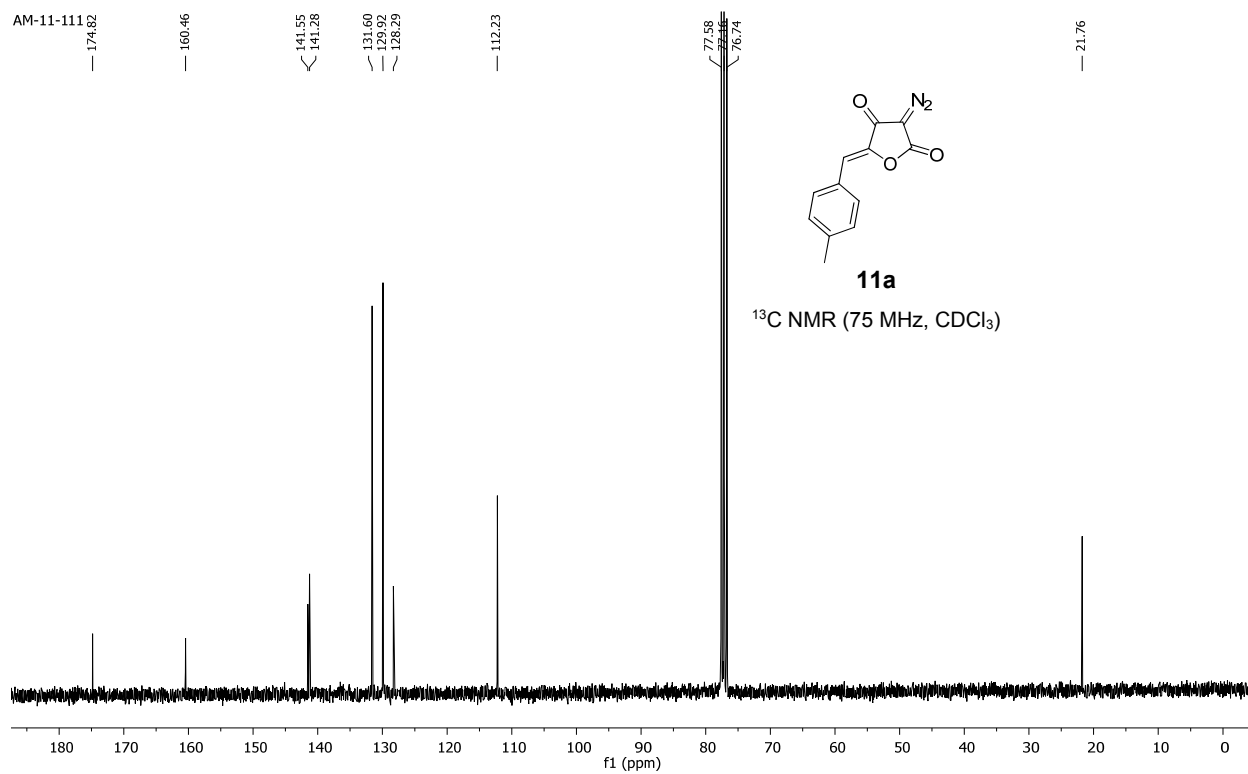

AM-10-159A

7.78  
7.77  
7.75  
7.74  
7.46  
7.45  
7.44  
7.43  
7.42  
7.41  
7.26  
6.09

-0.00

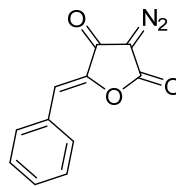

**11b**

<sup>1</sup>H NMR (300 MHz, CDCl<sub>3</sub>)

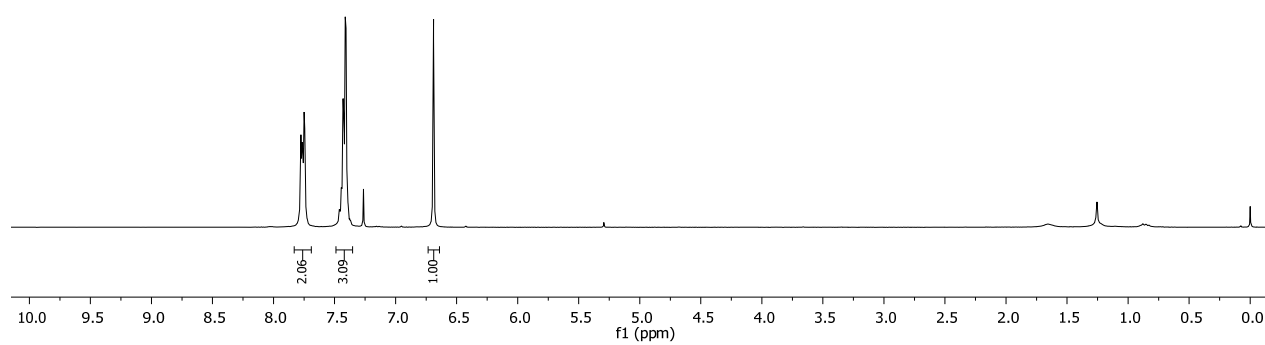

AM-10-159A

174.78

160.29

142.10

131.52

131.04

130.52

129.11

111.90

77.58

77.16

76.74

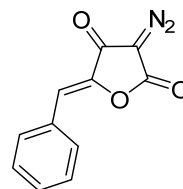

**11b**

<sup>13</sup>C NMR (75 MHz, CDCl<sub>3</sub>)

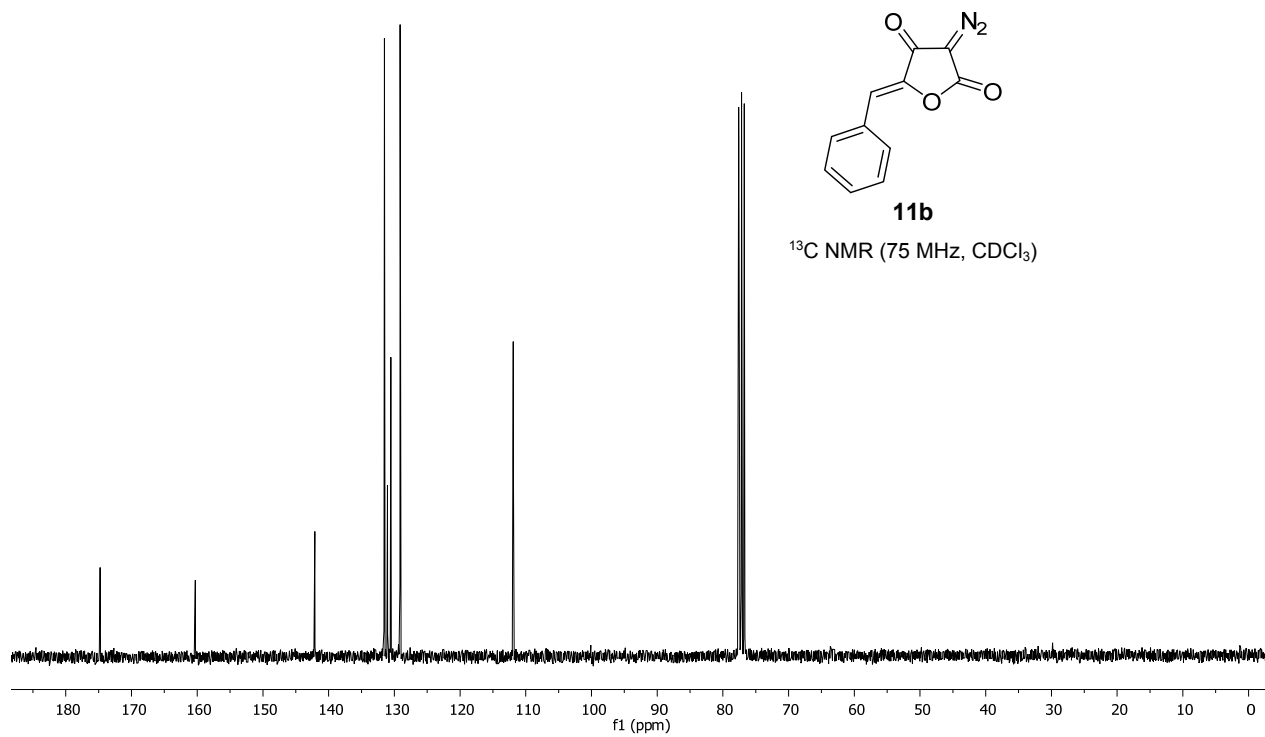

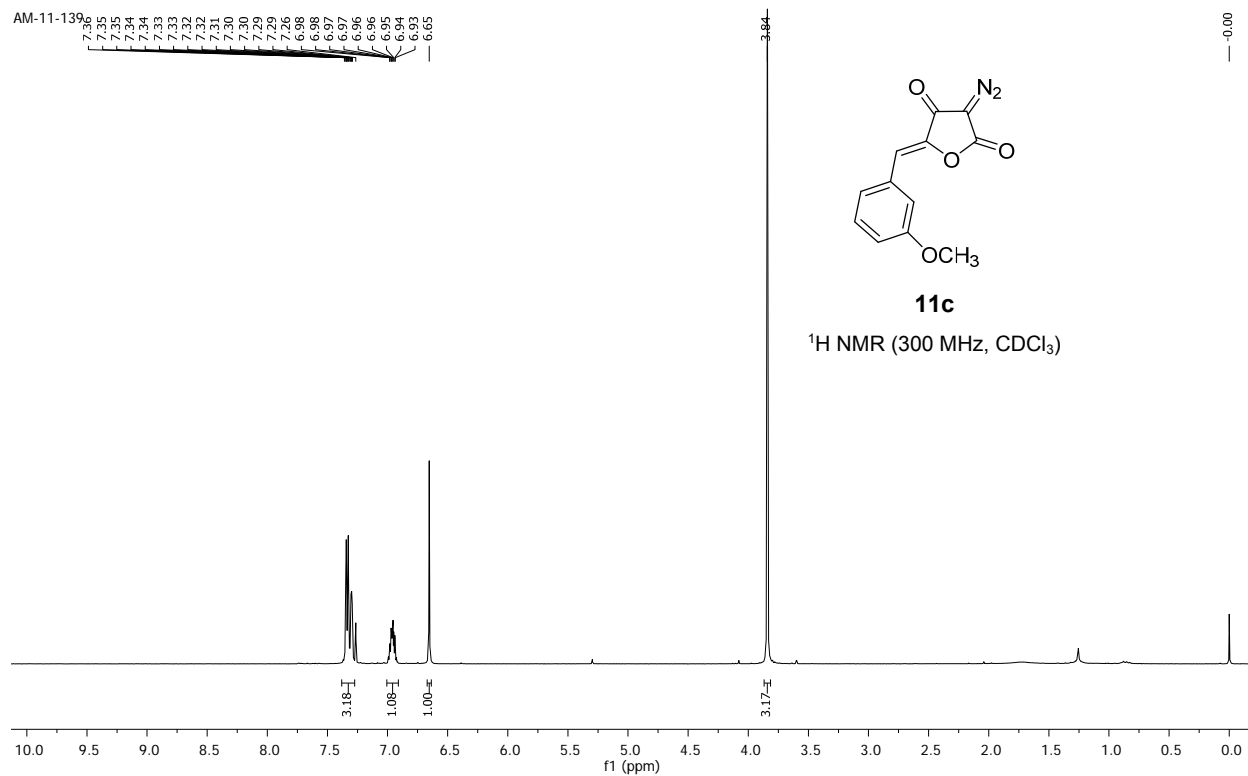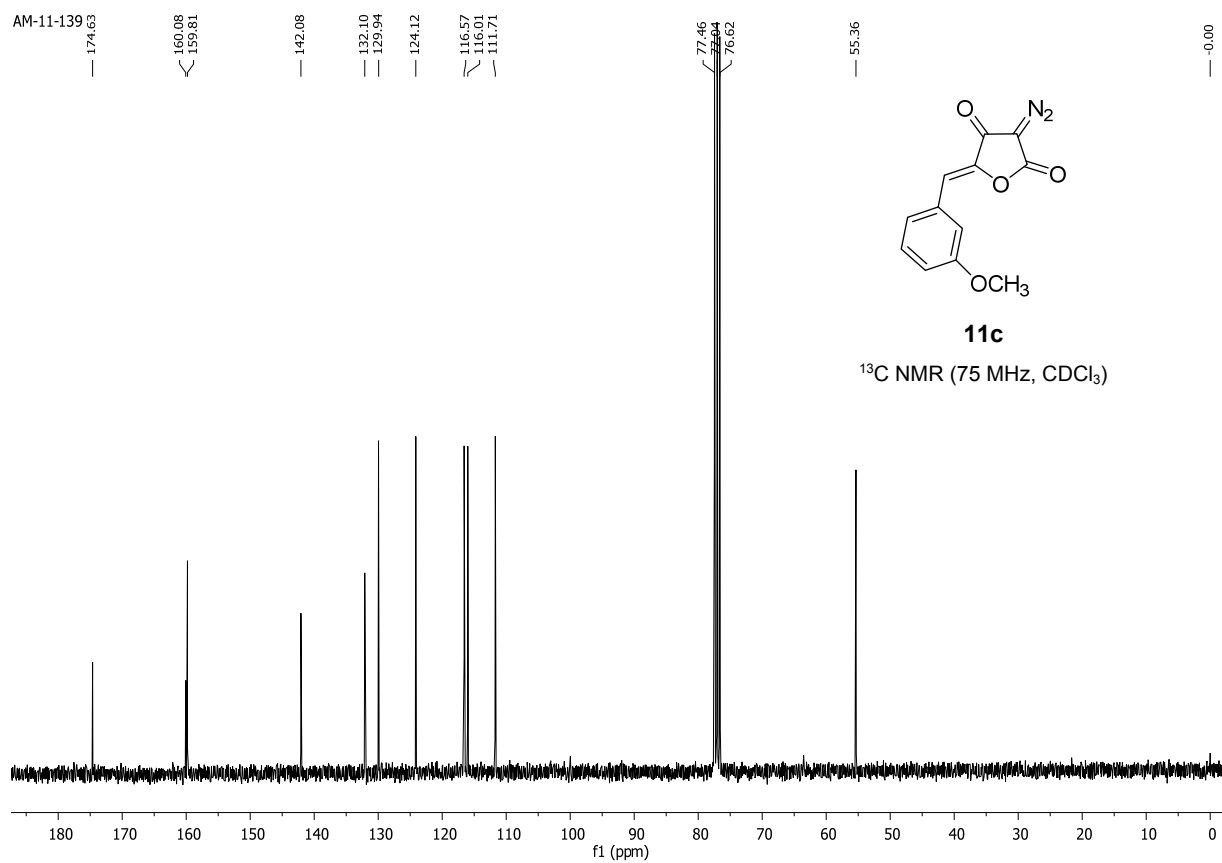

AM-10-189B

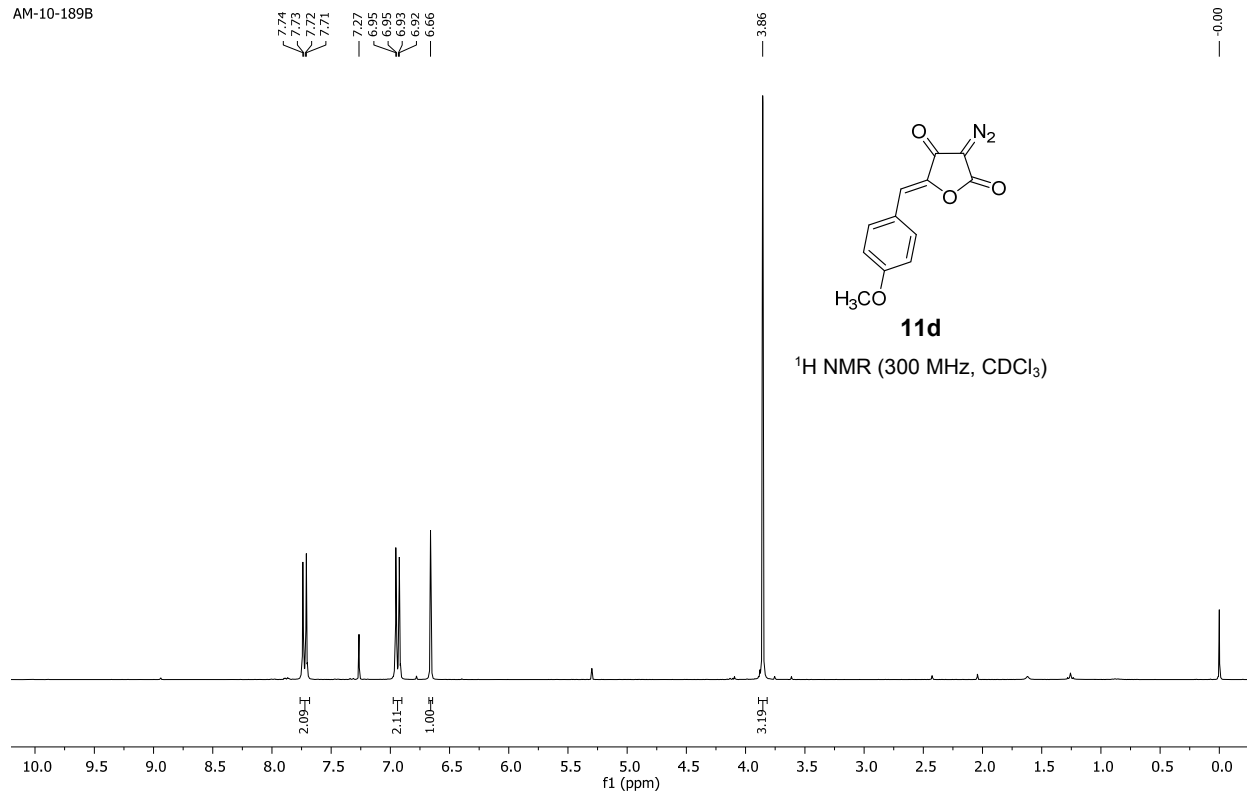

AM-10-189B

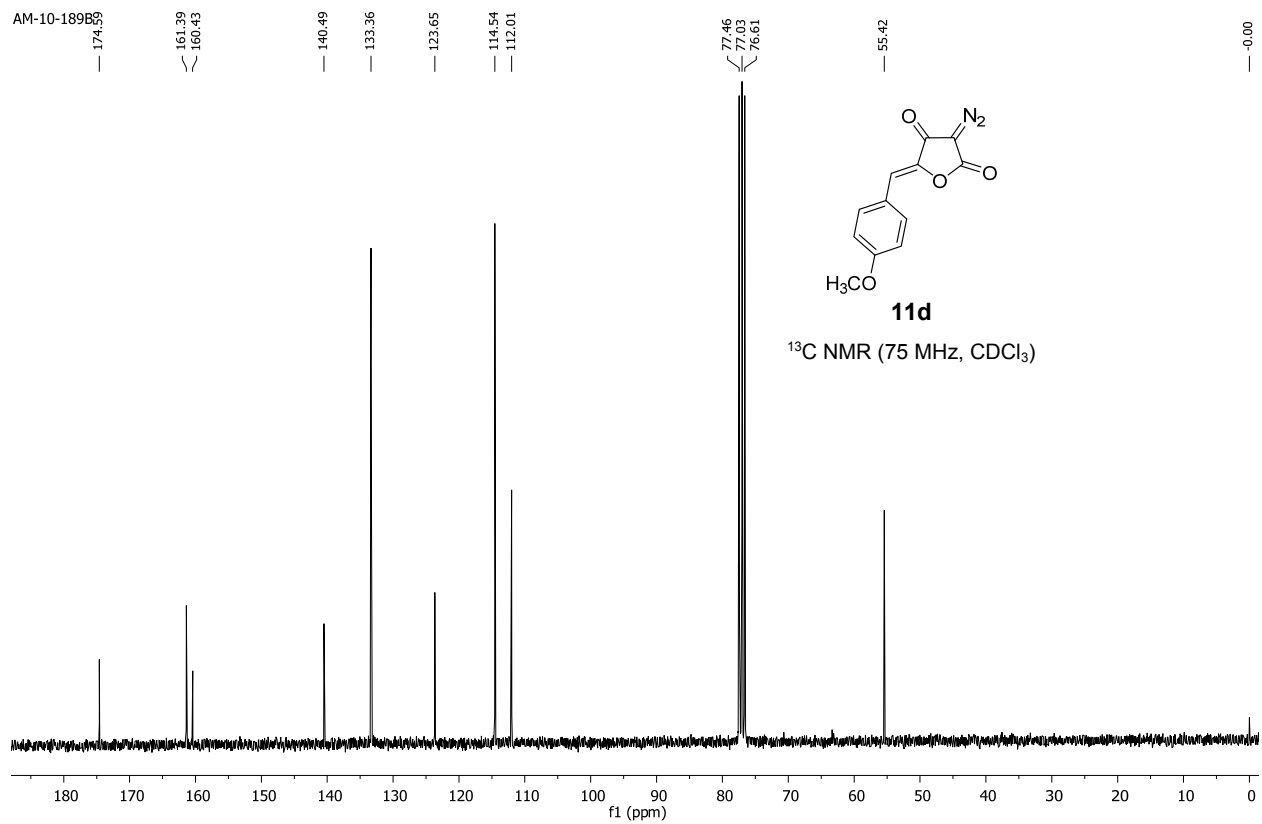

RAA-06-095.1.fid

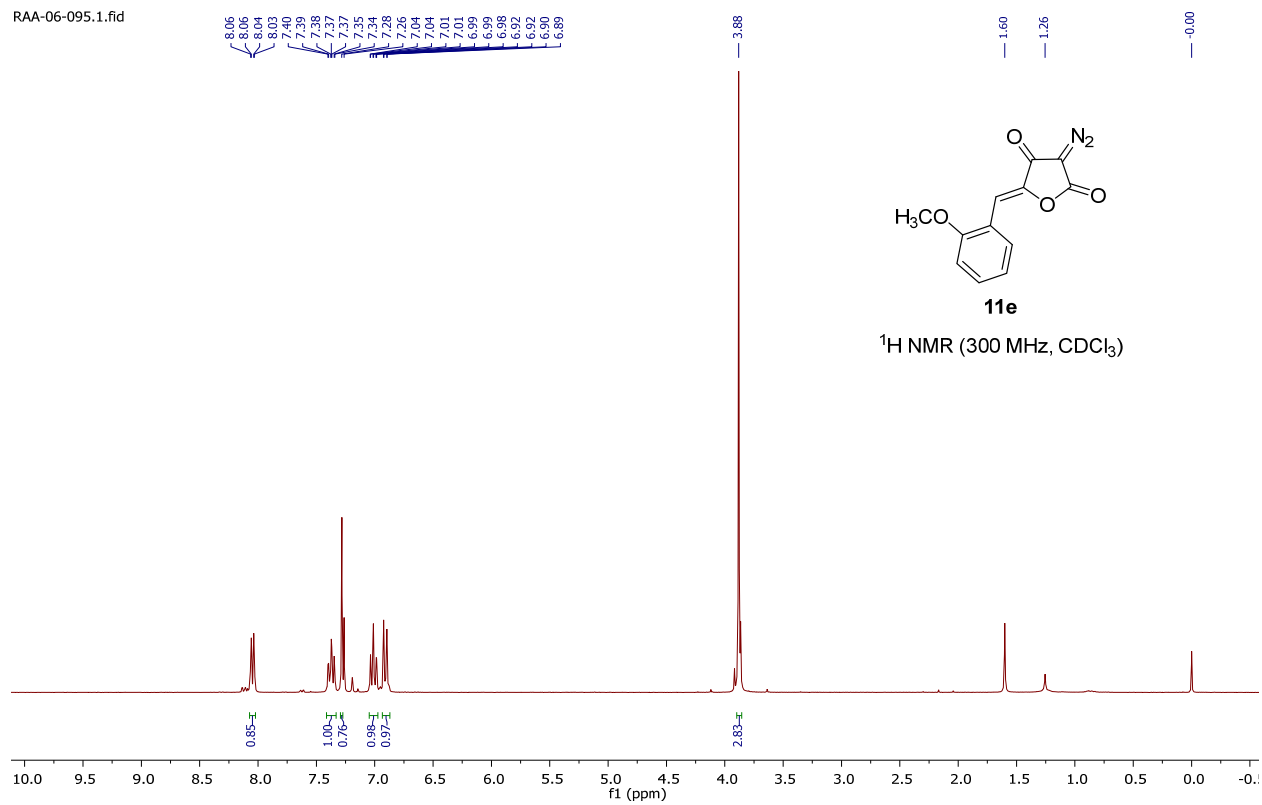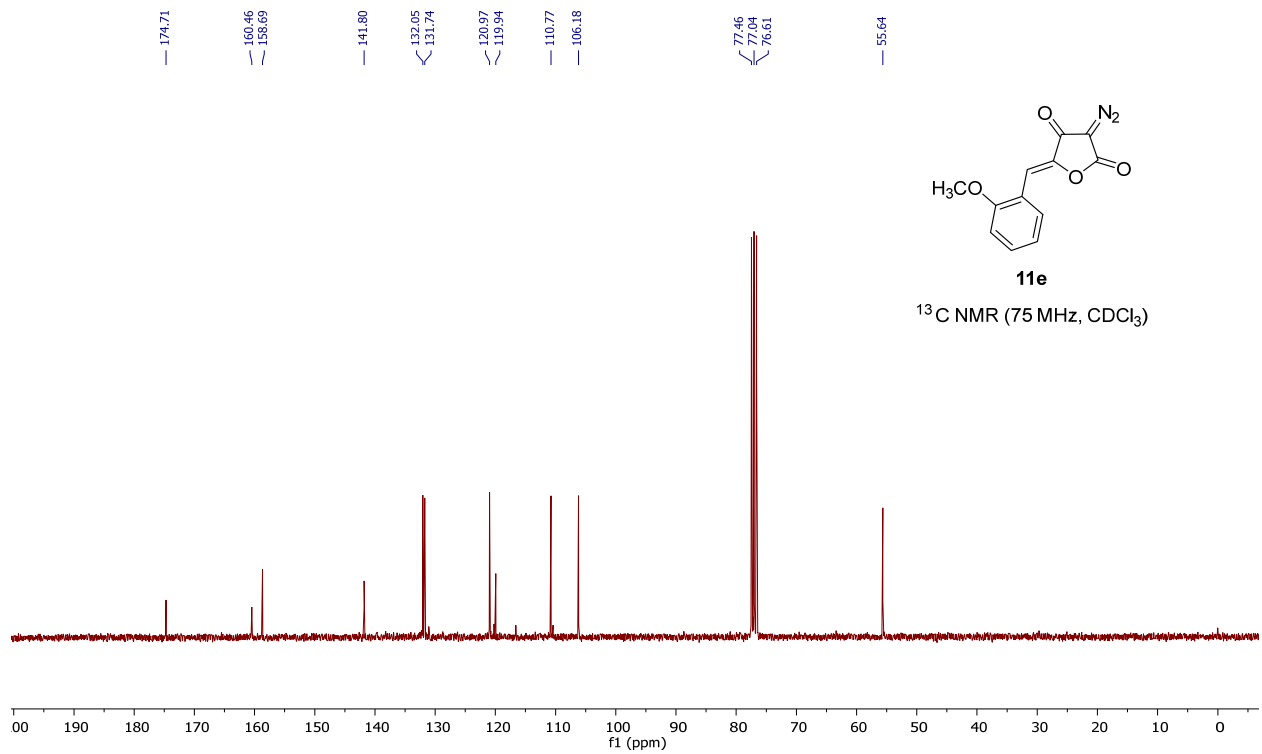

AM-11-187

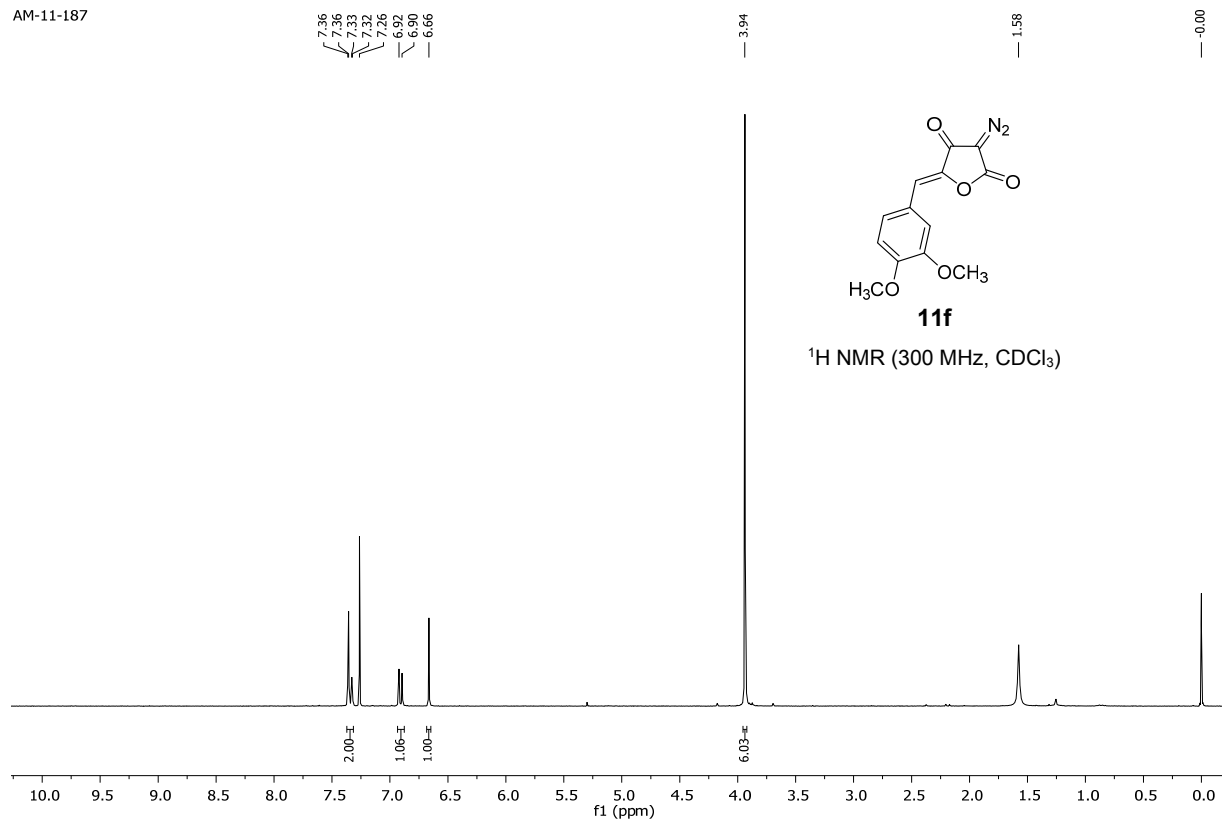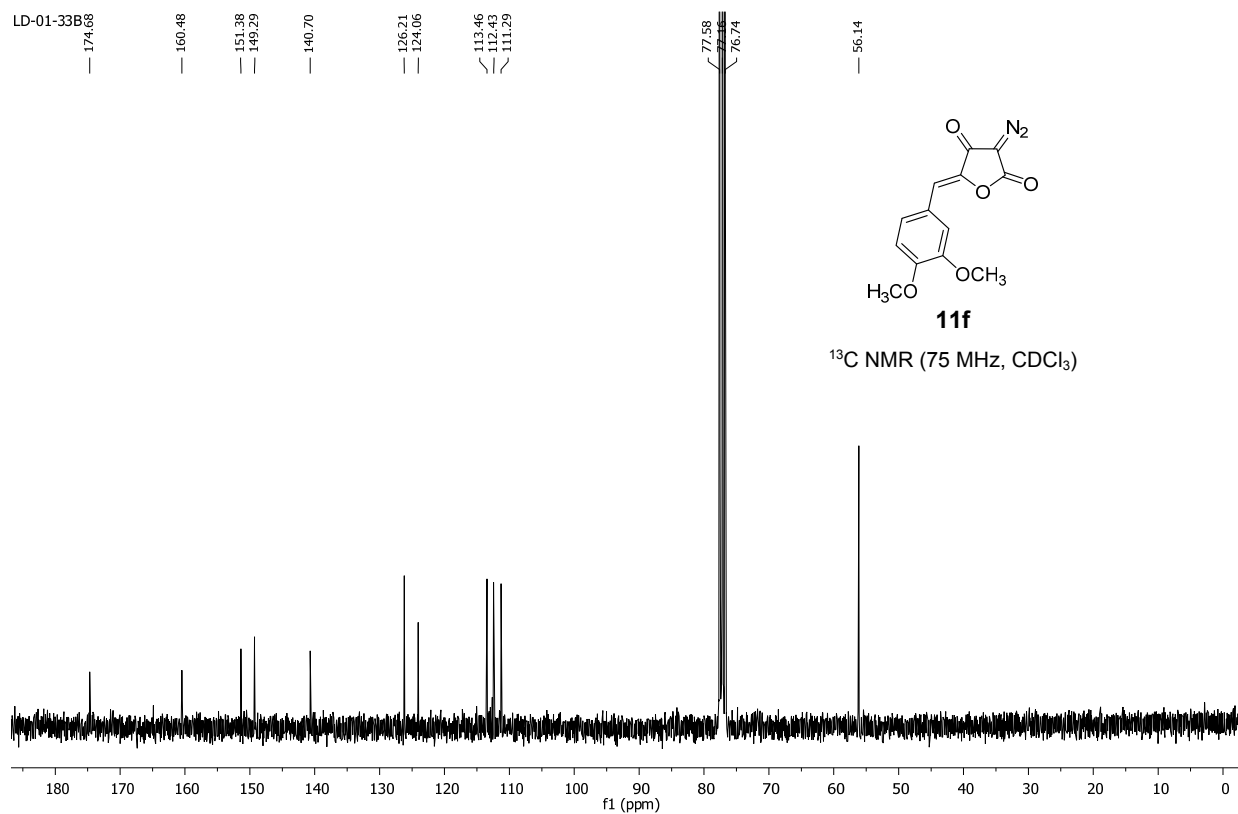

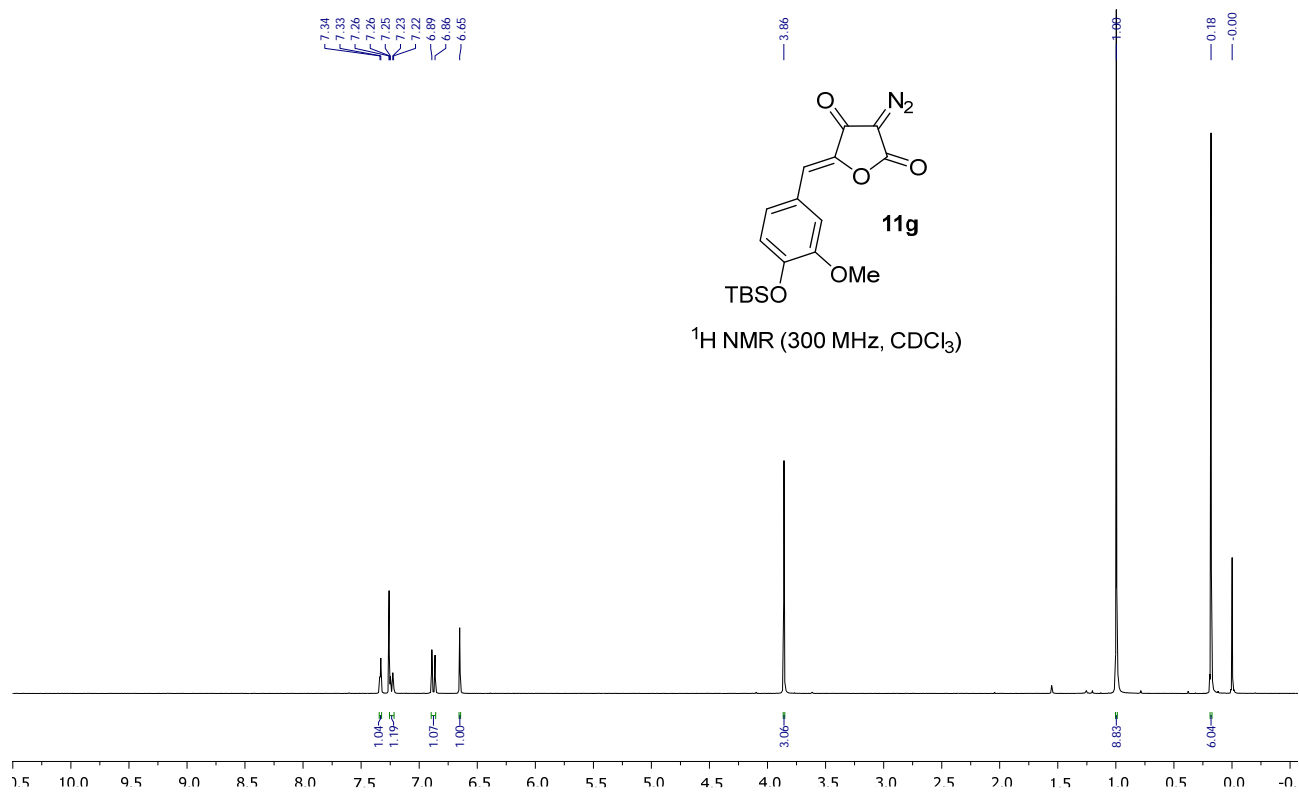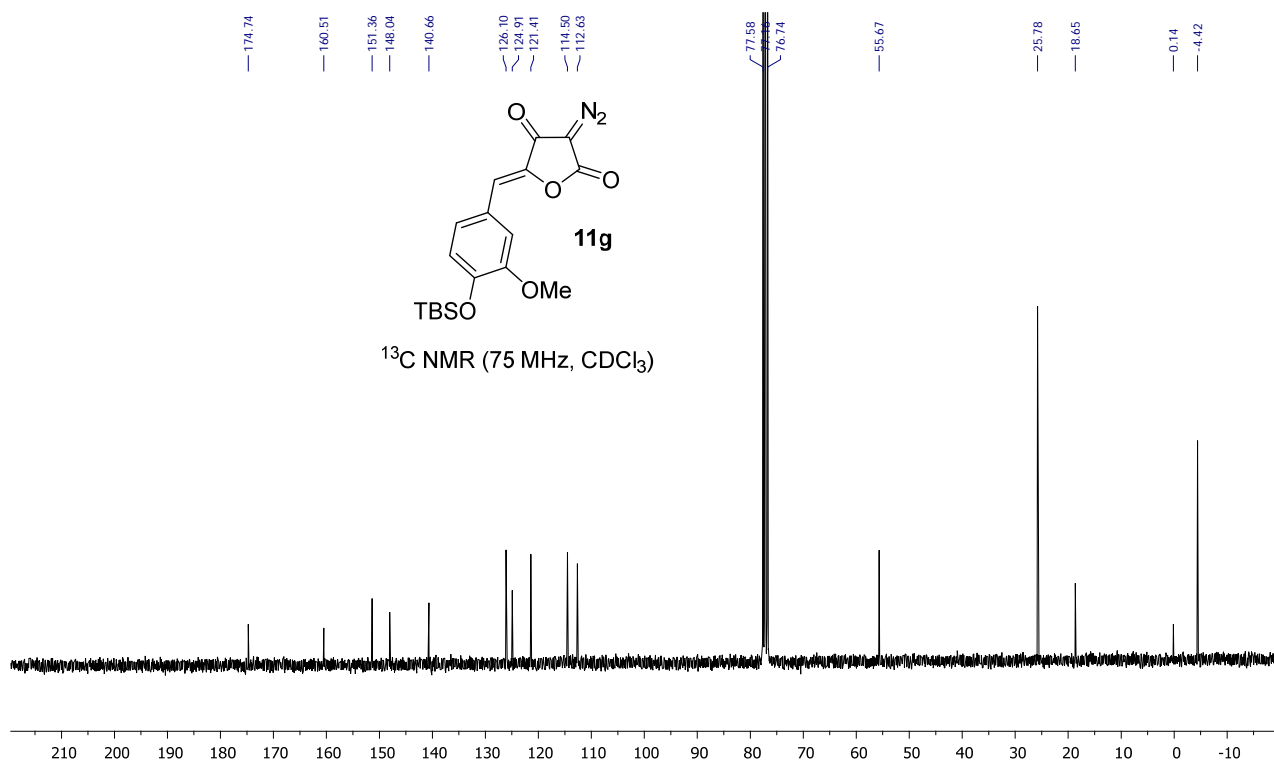



AM-11-153

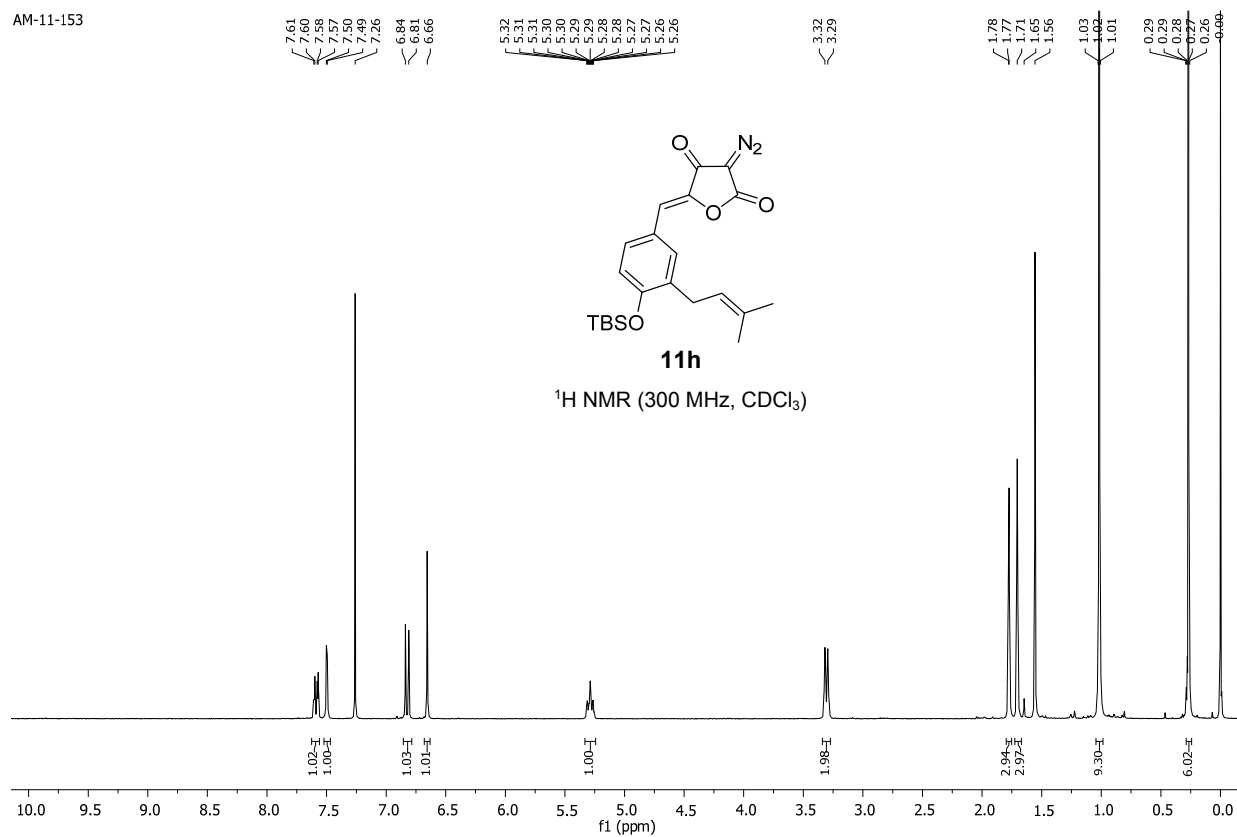

AM-11-75

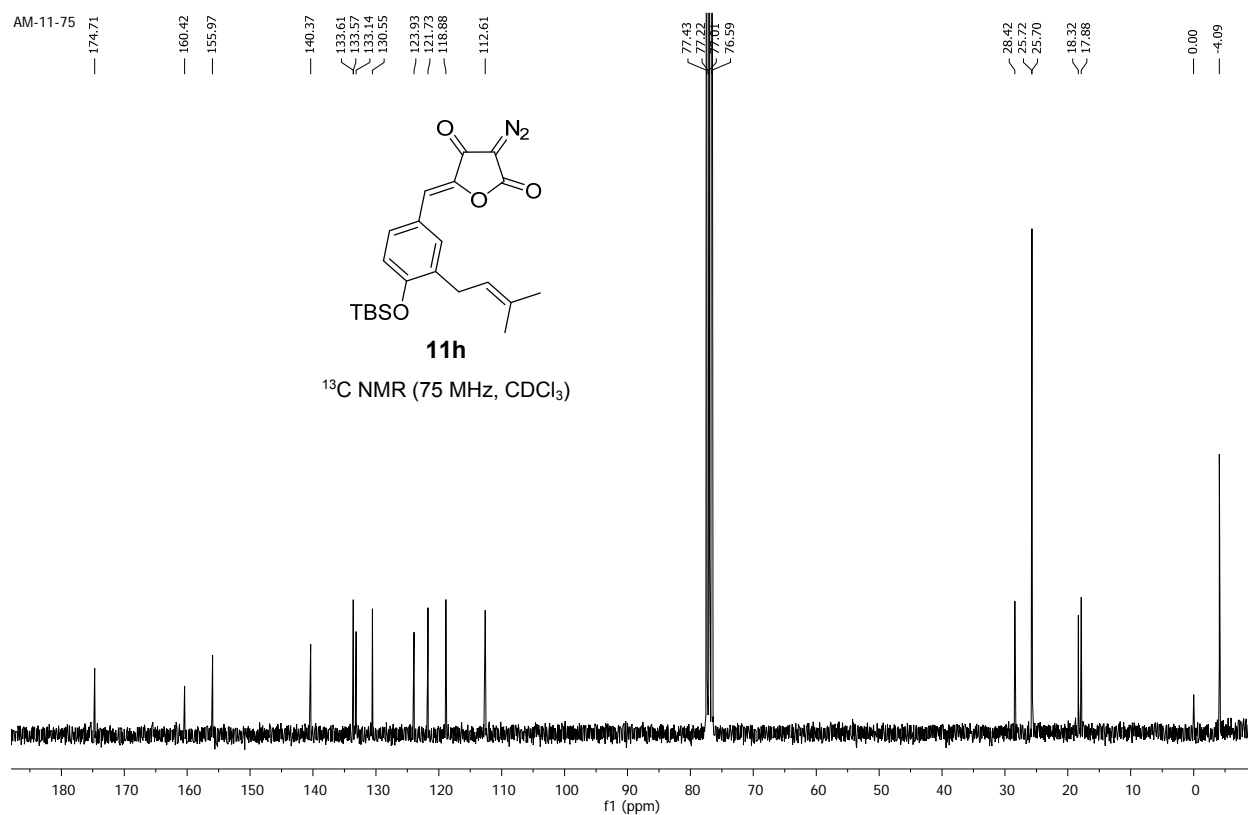

AM-11-11A

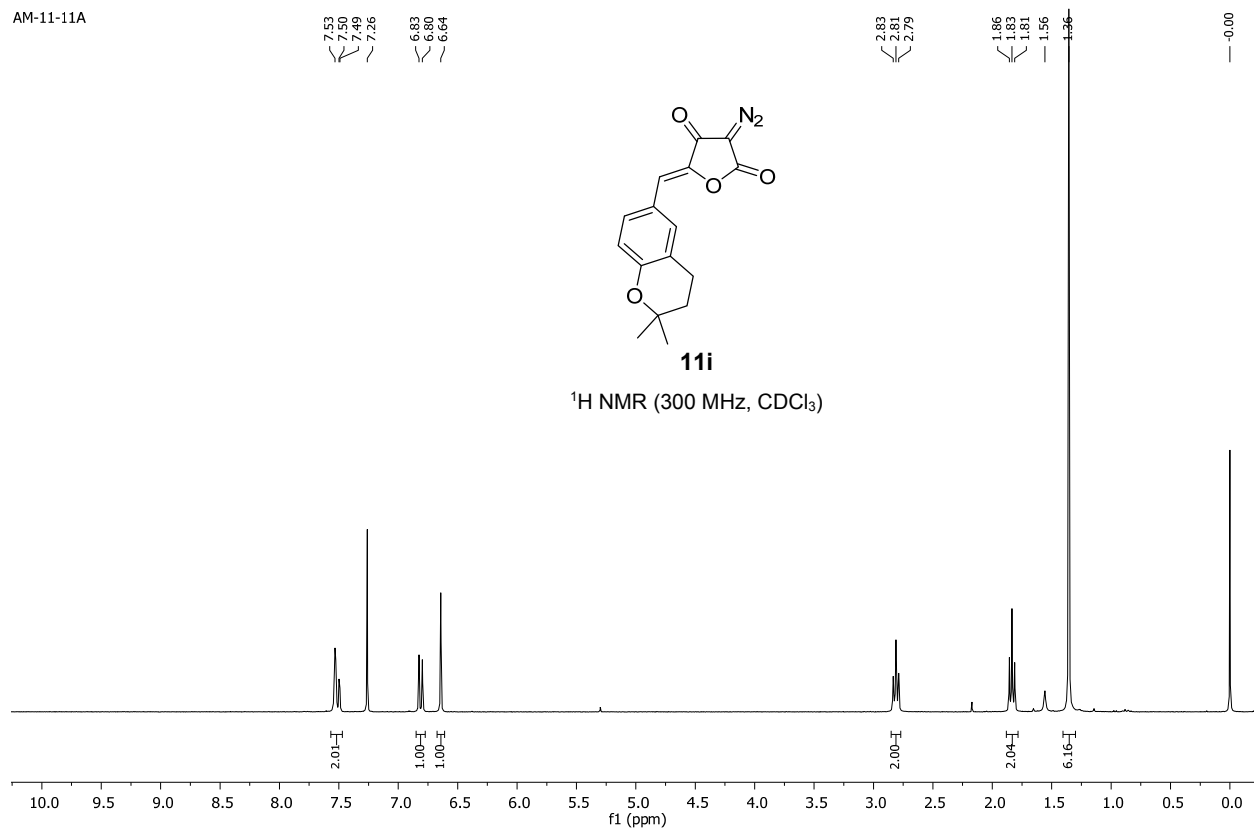

AM-11-11A

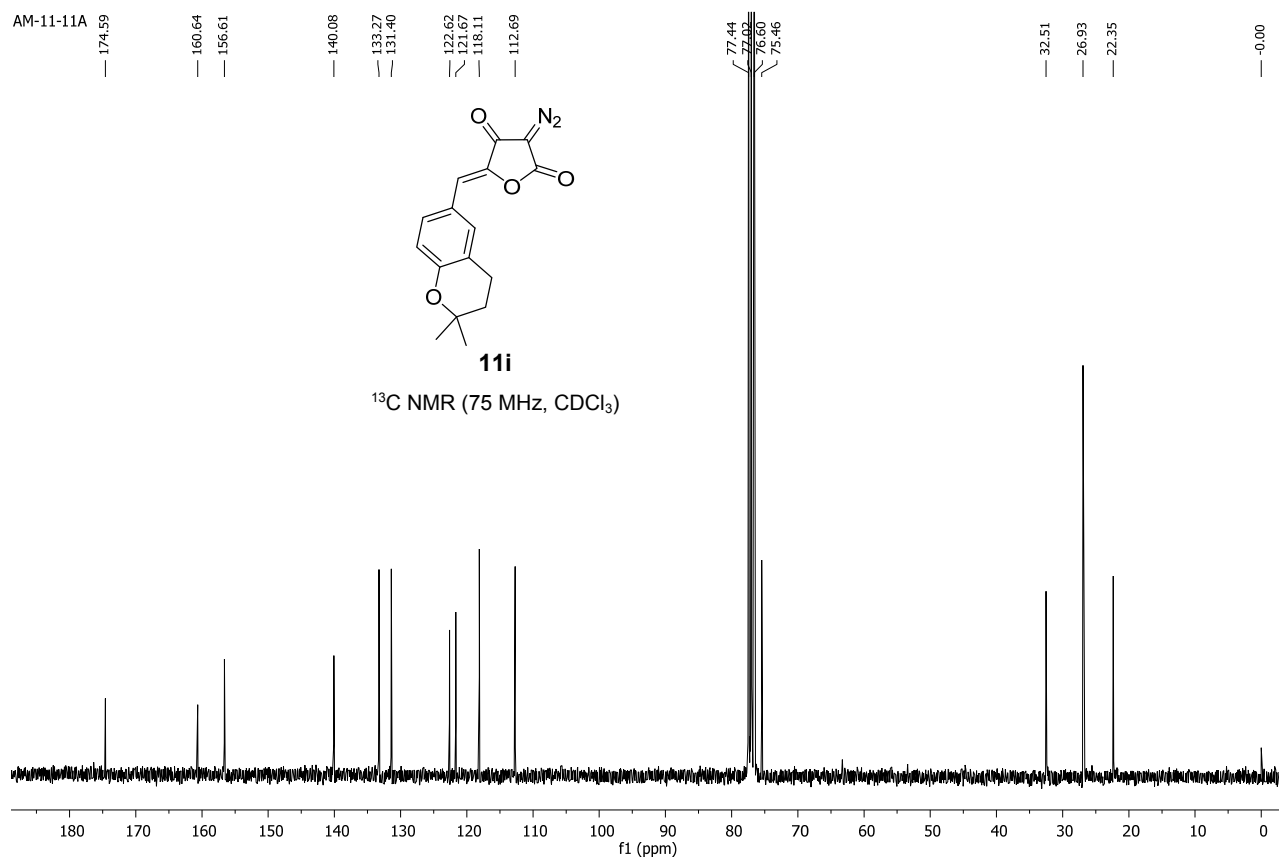

AM-11-117

8.22  
8.21  
7.92  
7.91  
7.90  
7.89  
7.88  
7.87  
7.86  
7.85  
7.84  
7.83  
7.82  
7.58  
7.56  
7.55  
7.54  
7.53  
7.52  
7.26  
6.86

1.57

-0.00

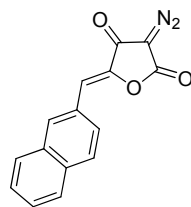

**11j**

<sup>1</sup>H NMR (300 MHz, CDCl<sub>3</sub>)

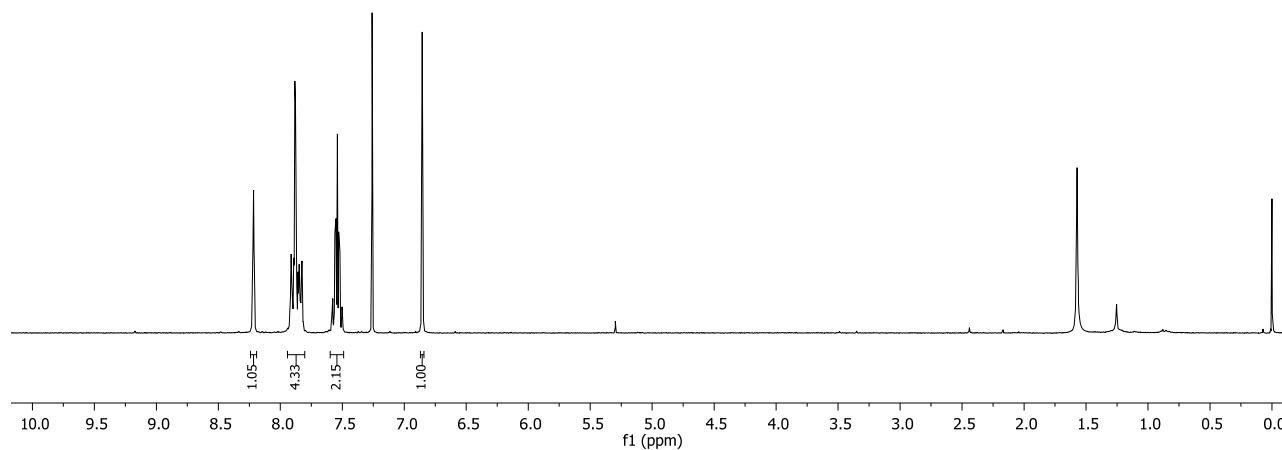

AM-11-117

174.74

160.41

142.22

134.02

133.31

132.61

128.96

138.69

127.98

127.88

127.44

126.94

112.22

77.58

77.46

76.74

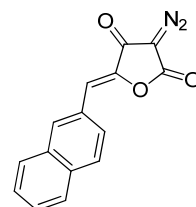

**11j**

<sup>13</sup>C NMR (75 MHz, CDCl<sub>3</sub>)

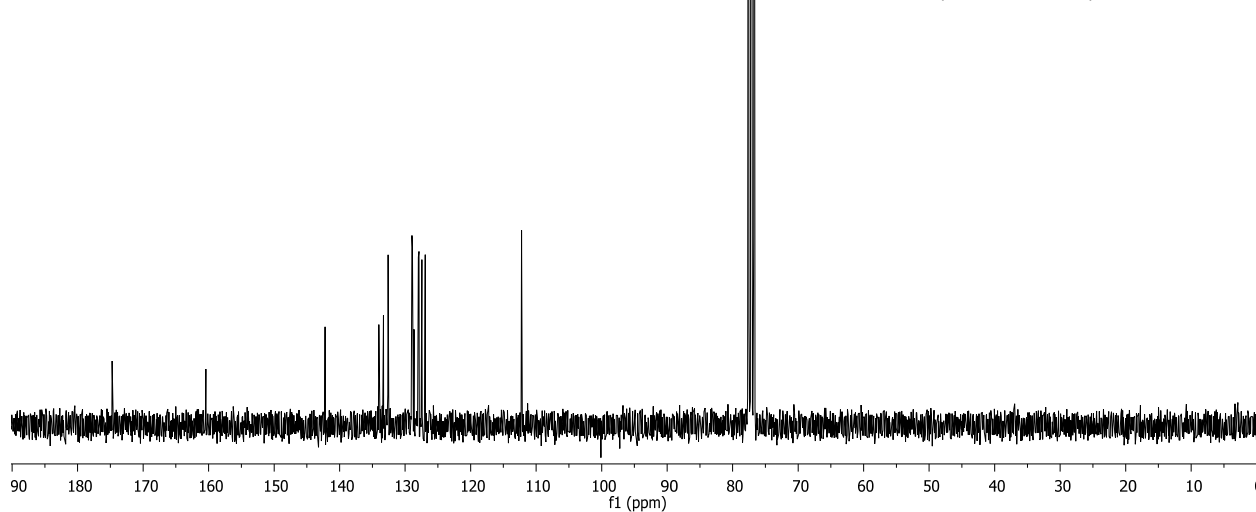

AM-11-135

7.86  
7.86  
7.85  
7.83  
7.67  
7.67  
7.64  
7.28  
6.67

0.00

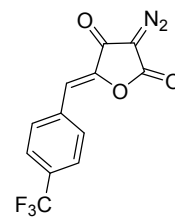

**11k**

<sup>1</sup>H NMR (300 MHz, CDCl<sub>3</sub>)

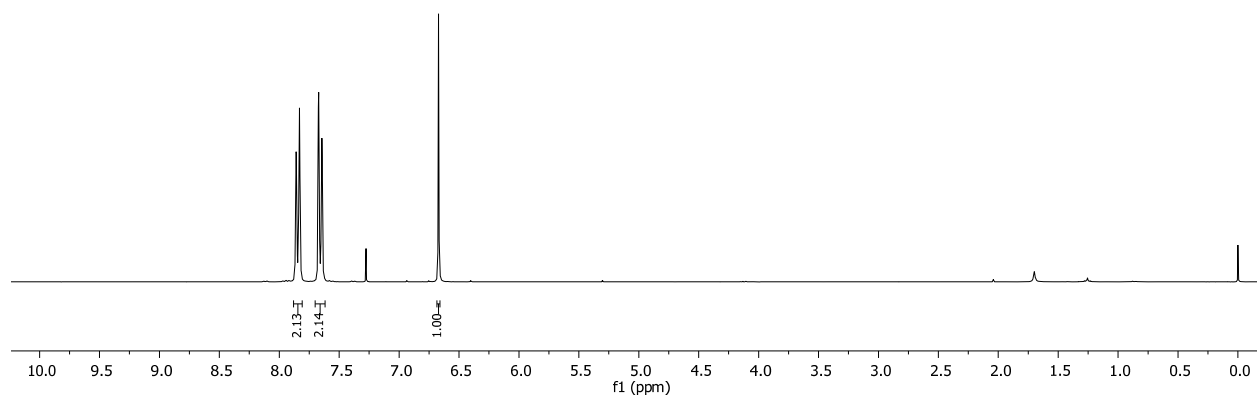

AM-11-135

174.36  
159.76  
143.35  
134.33  
134.33  
132.71  
132.71  
131.78  
131.34  
130.91  
129.15  
125.93  
125.88  
125.83  
125.59  
125.59  
121.93  
118.32  
109.47

77.52  
77.52  
76.67

0.00

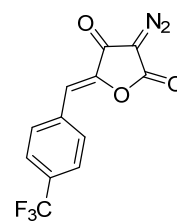

**11k**

<sup>13</sup>C NMR (75 MHz, CDCl<sub>3</sub>)

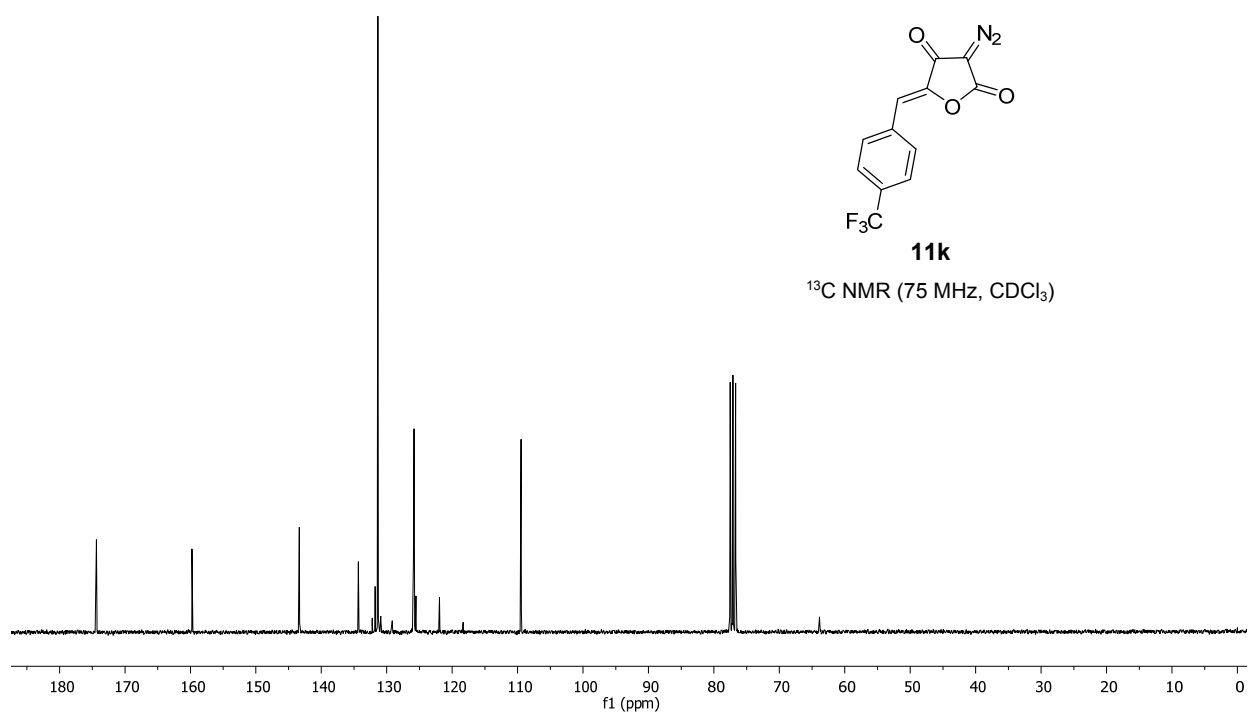

AM-11-143

7.64  
7.63  
7.62  
7.61  
7.57  
7.56  
7.55  
7.54  
7.26

6.62

-0.00

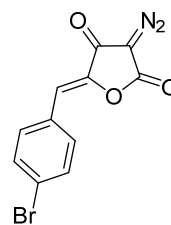

**11I**

<sup>1</sup>H NMR (300 MHz, CDCl<sub>3</sub>)

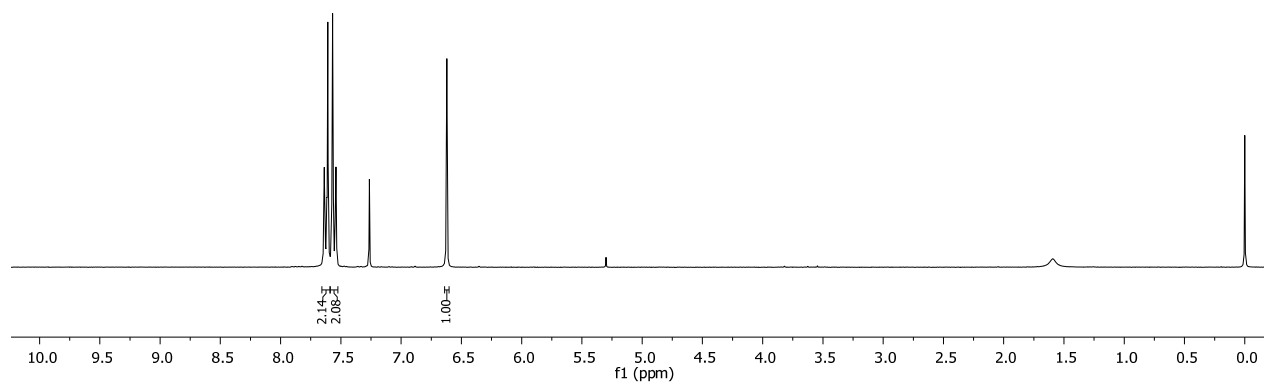

AM-11-1433

174.43

159.93

142.31

132.65

132.30

129.83

124.99

110.40

77.46

76.61

-0.00

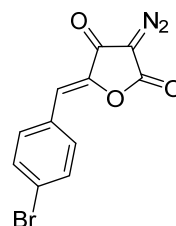

**11I**

<sup>13</sup>C NMR (75 MHz, CDCl<sub>3</sub>)

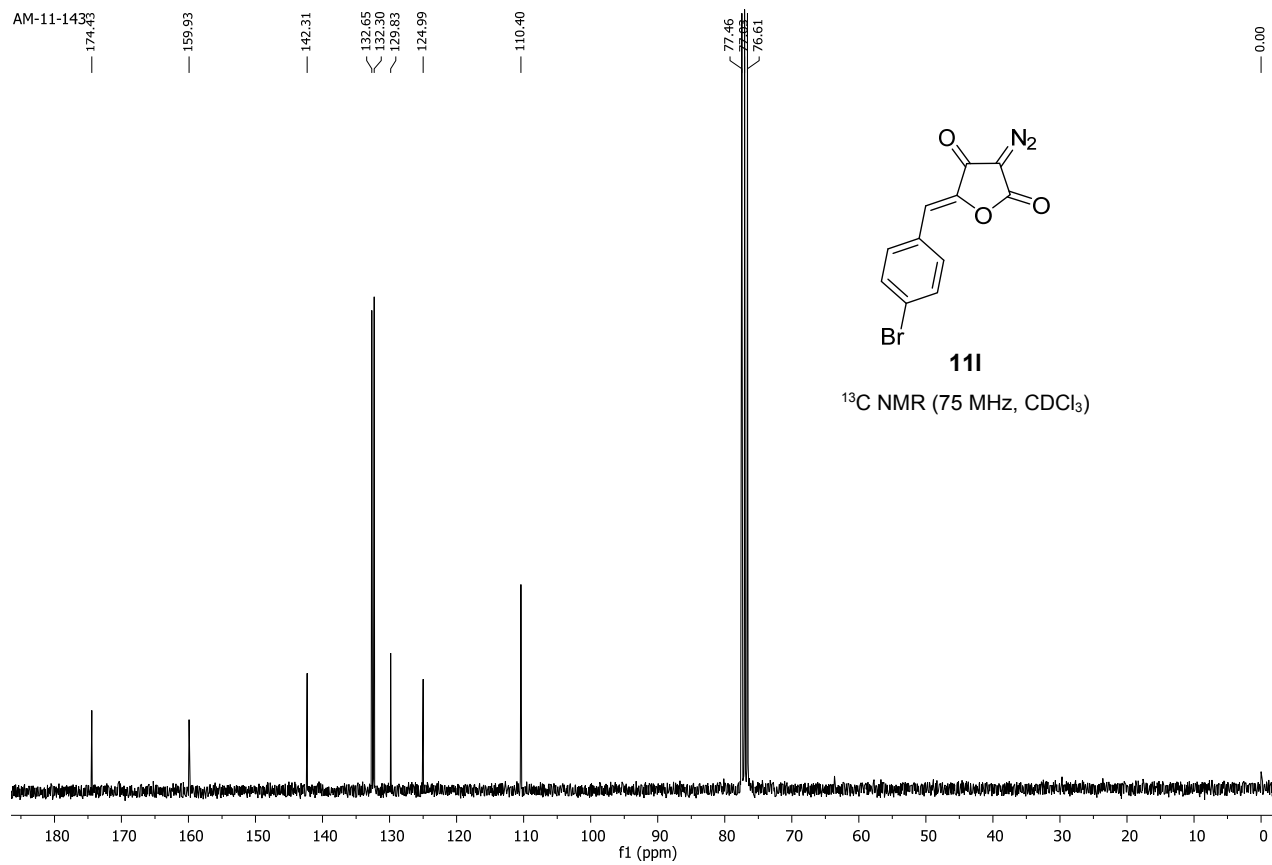

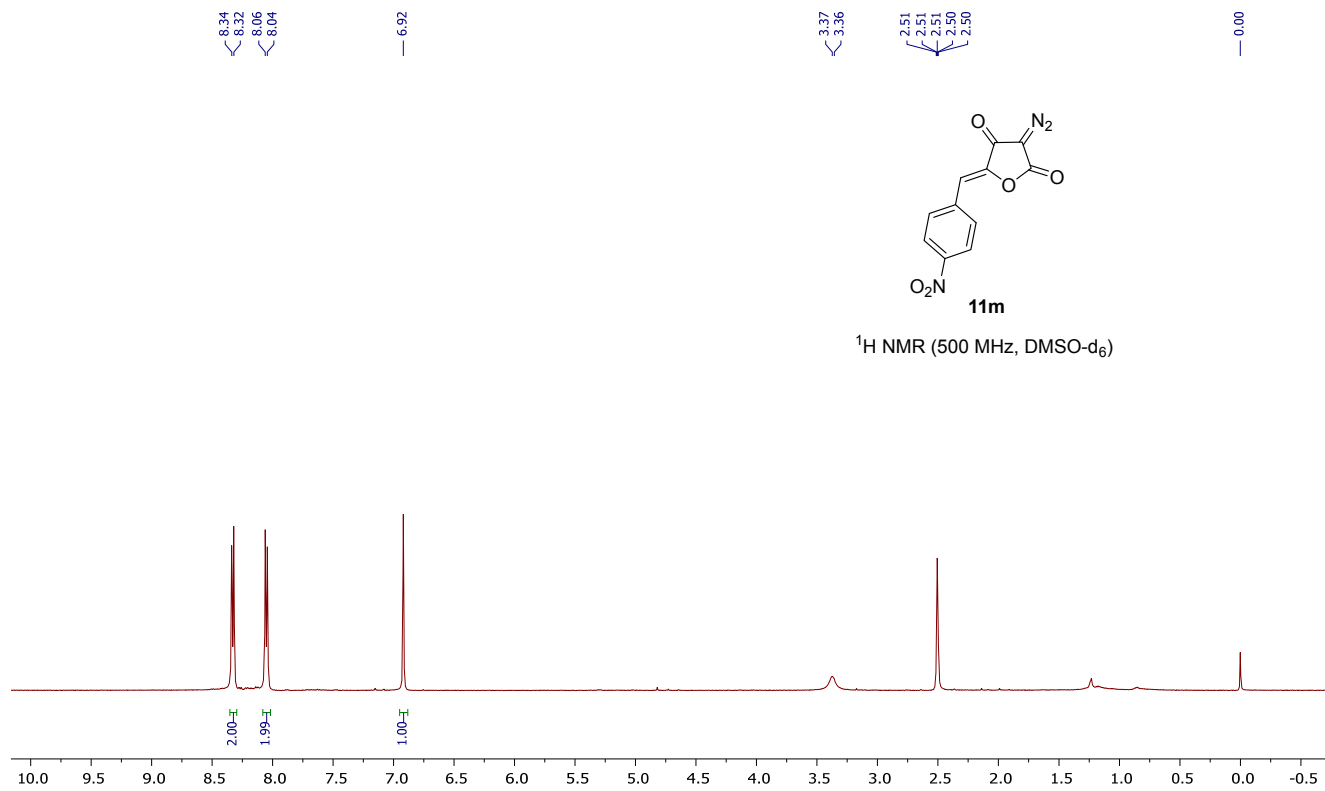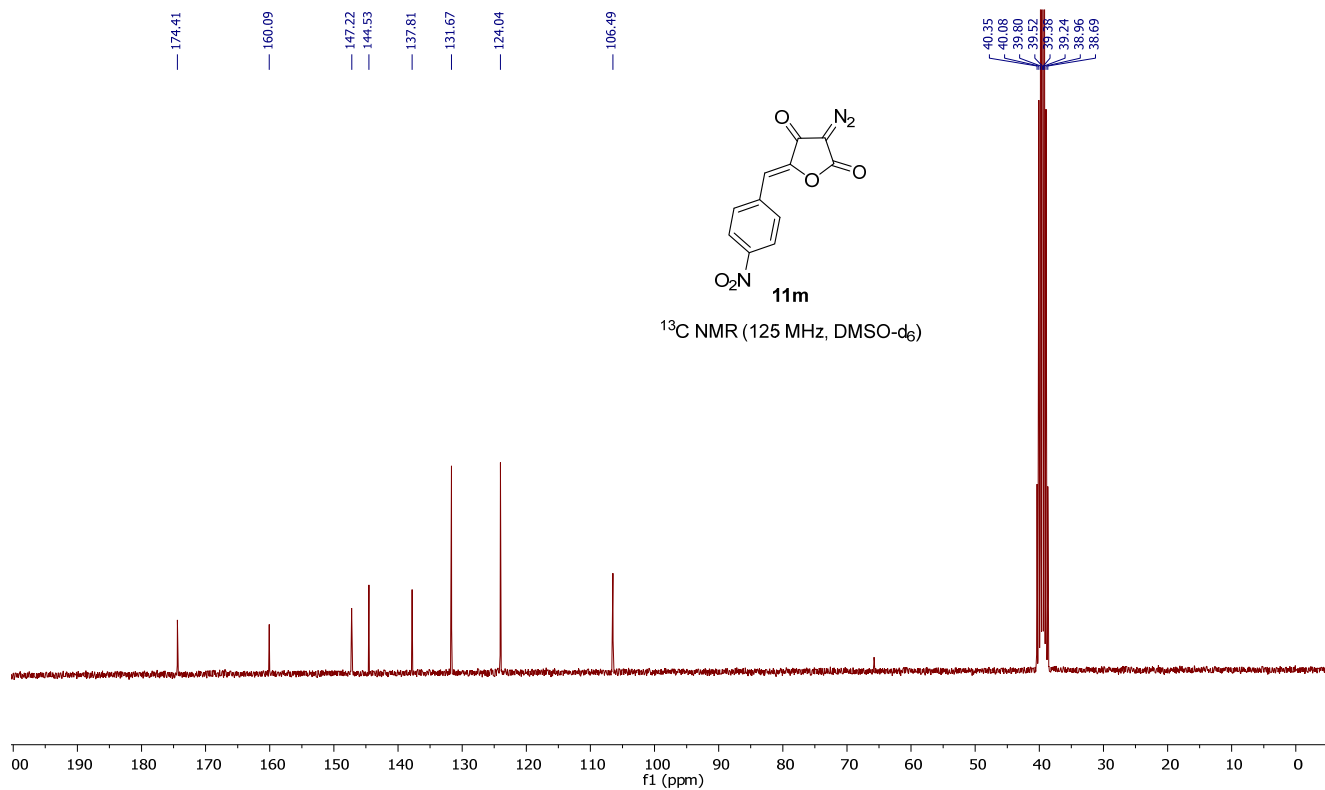

AM-11-141

7.59  
7.58  
7.58  
7.57  
7.28  
7.04  
7.04  
7.03  
7.02  
6.70  
6.70  
6.58  
6.58  
6.58  
6.57  
6.57  
6.56  
6.56

0.00

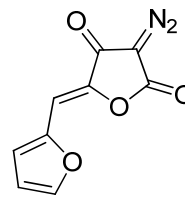

**11n**

<sup>1</sup>H NMR (300 MHz, CDCl<sub>3</sub>)

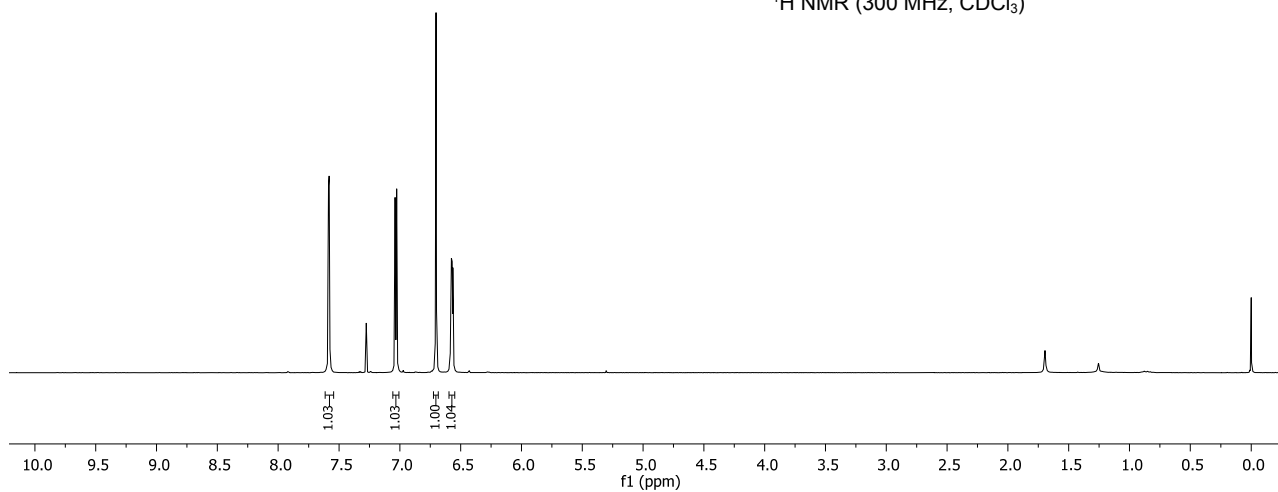

AM-11-141

173.78

160.01

147.48

145.60

139.80

117.61

113.19

100.54

77.49

77.06

76.64

0.00

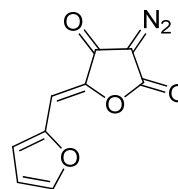

**11n**

<sup>13</sup>C NMR (75 MHz, CDCl<sub>3</sub>)

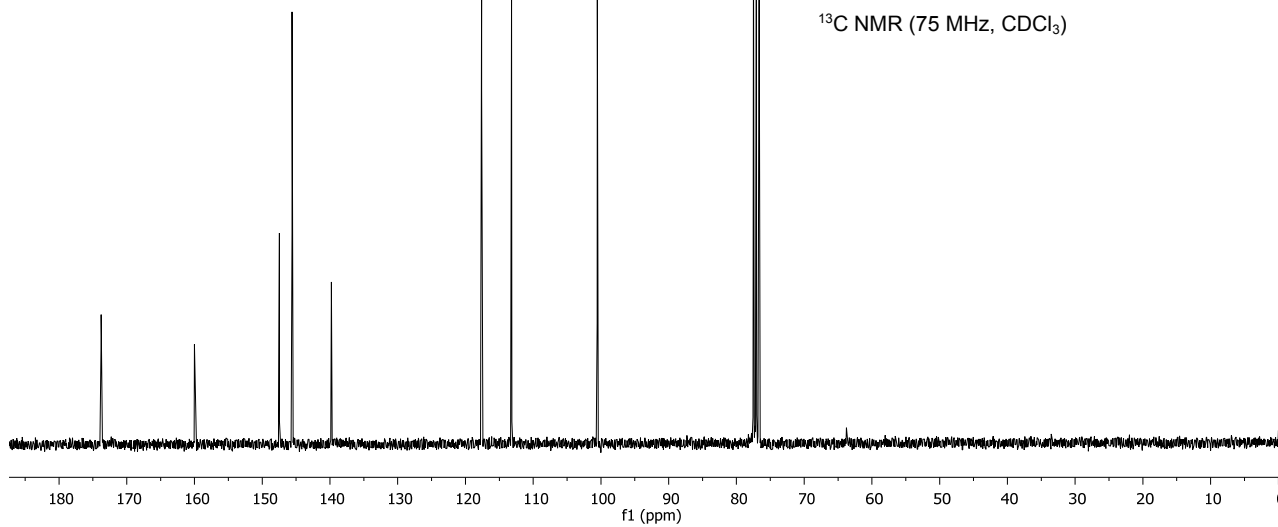

AM-11-145

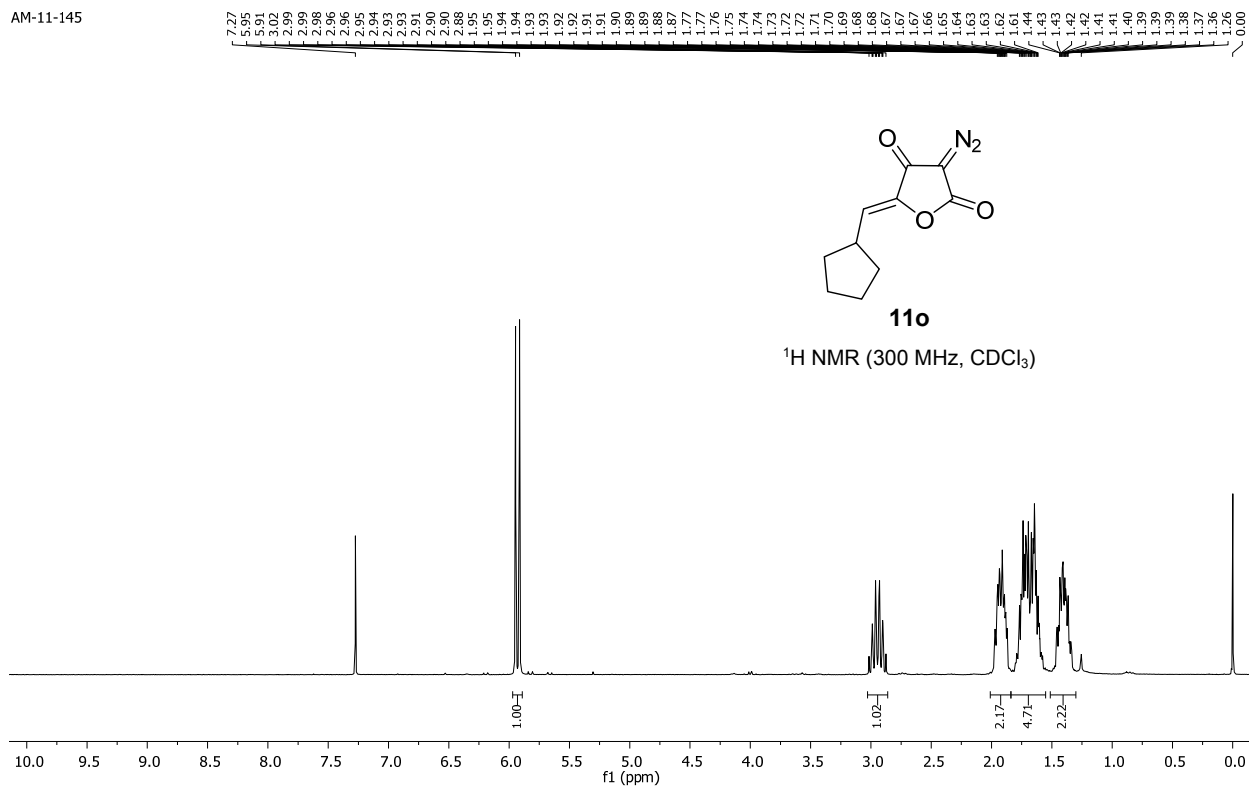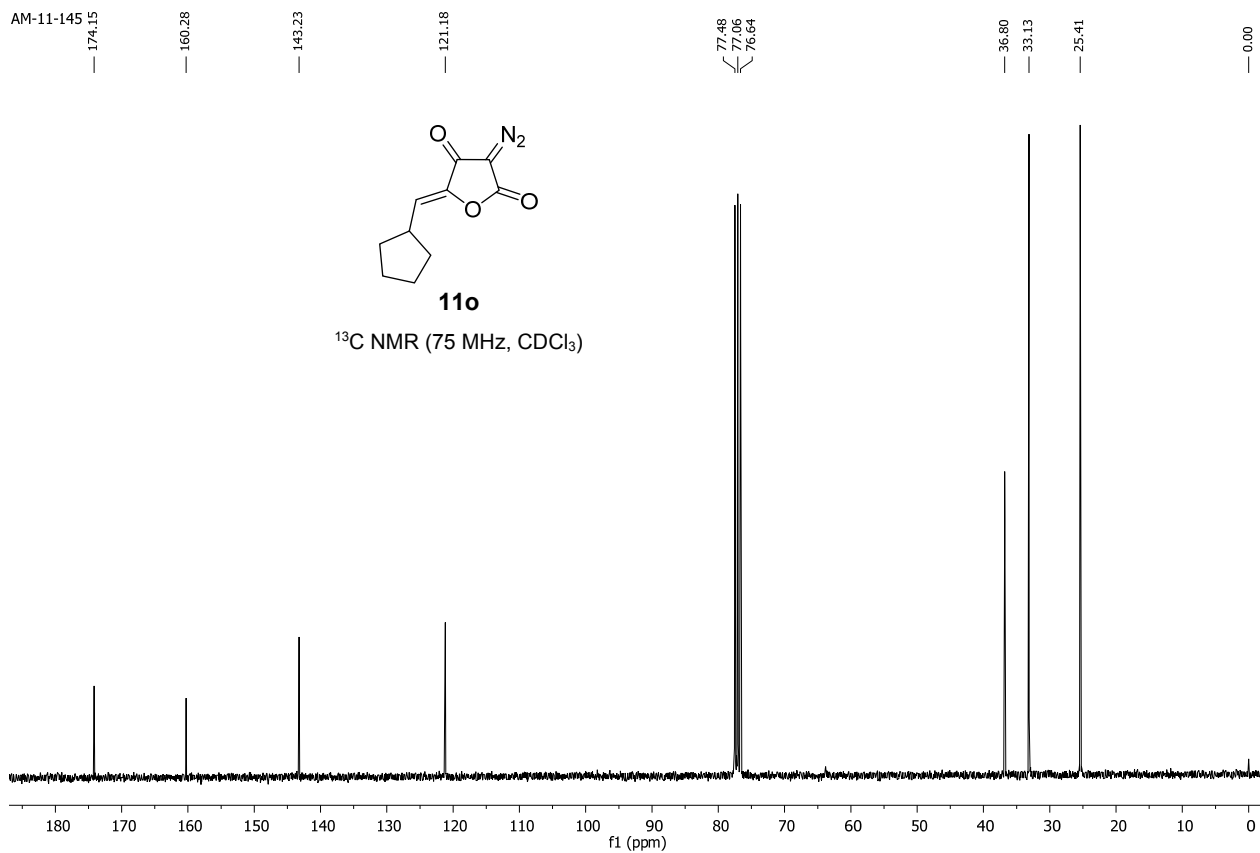



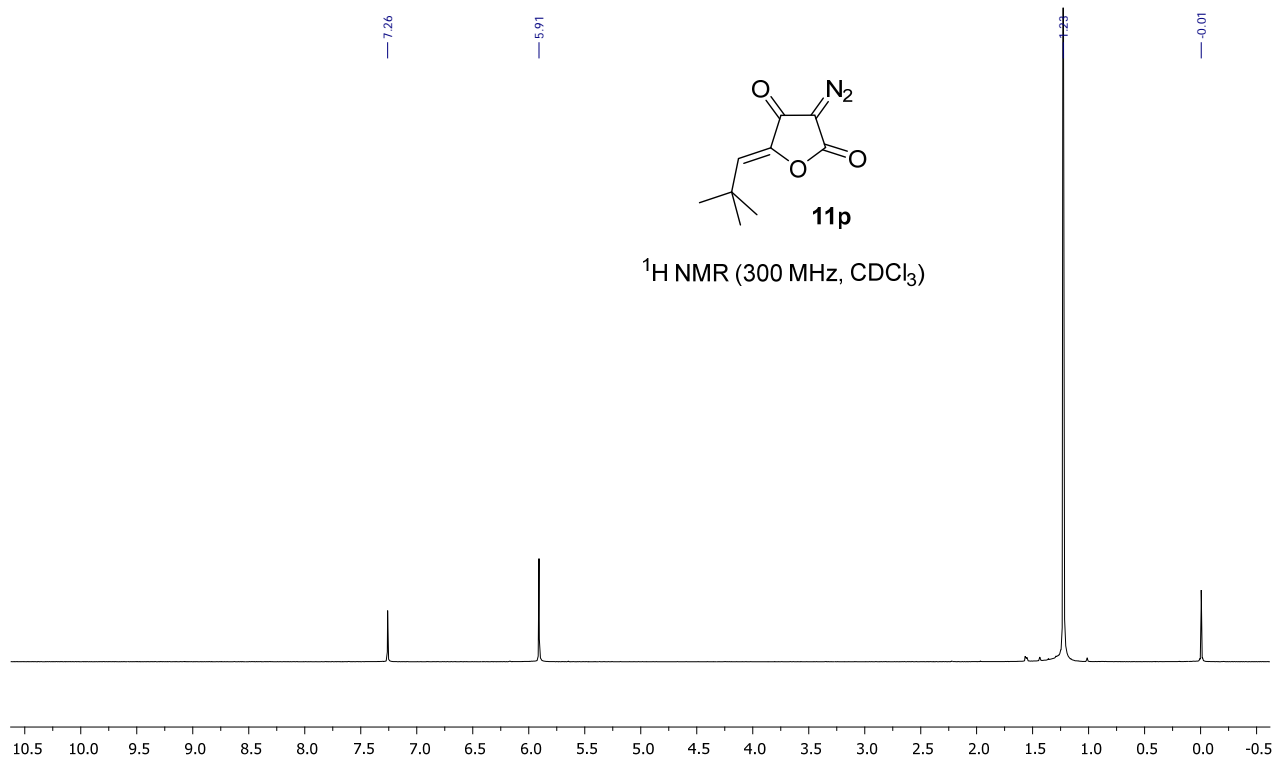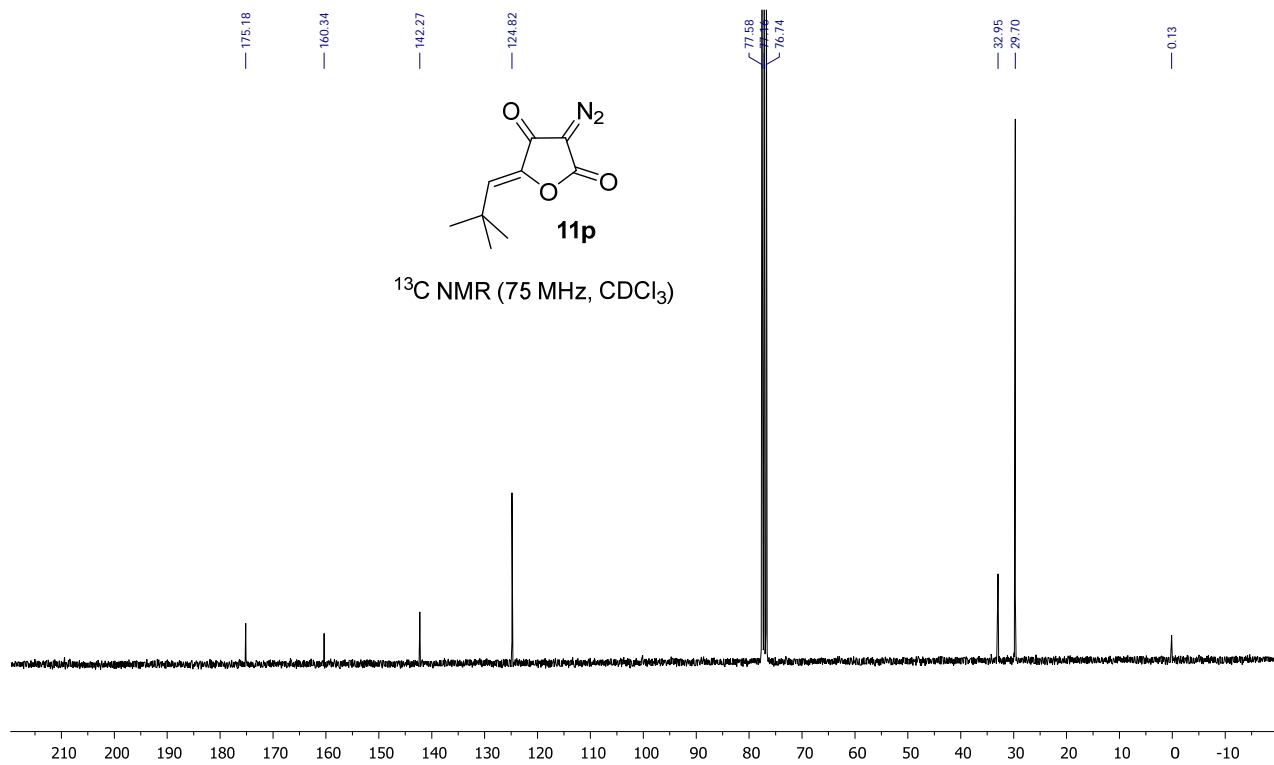

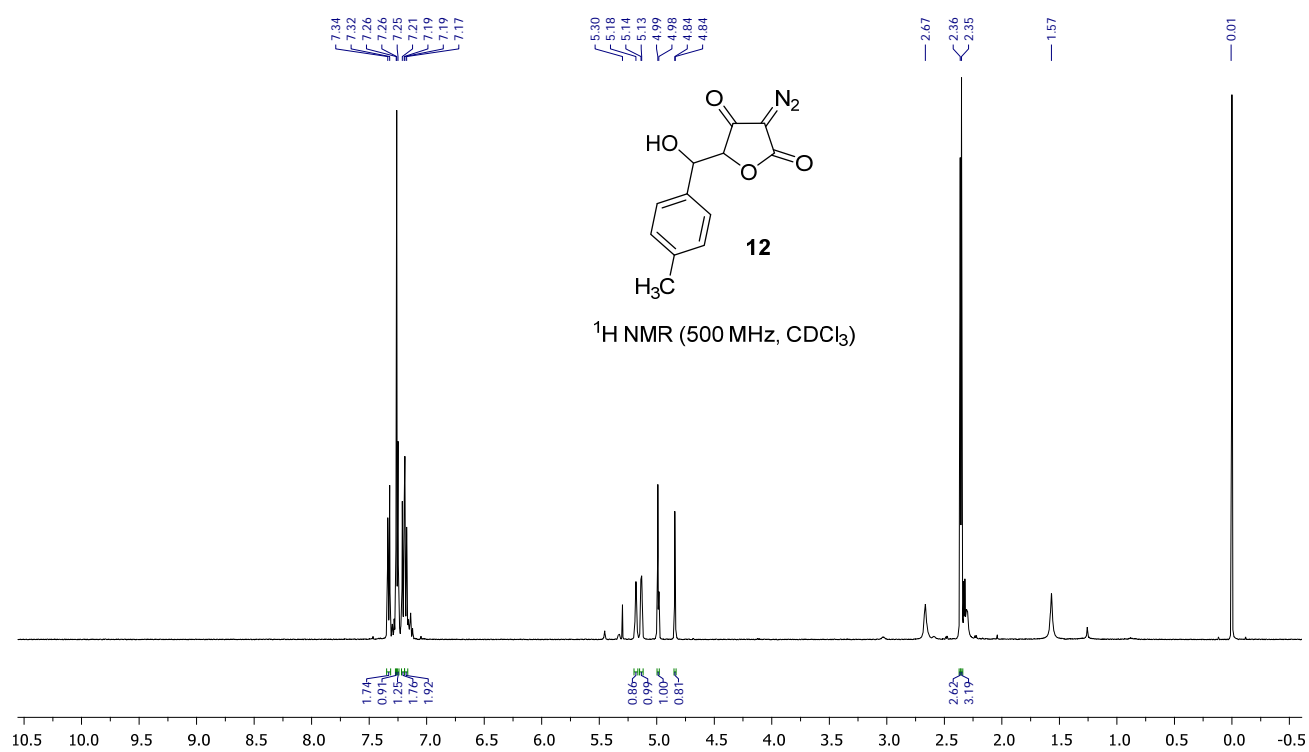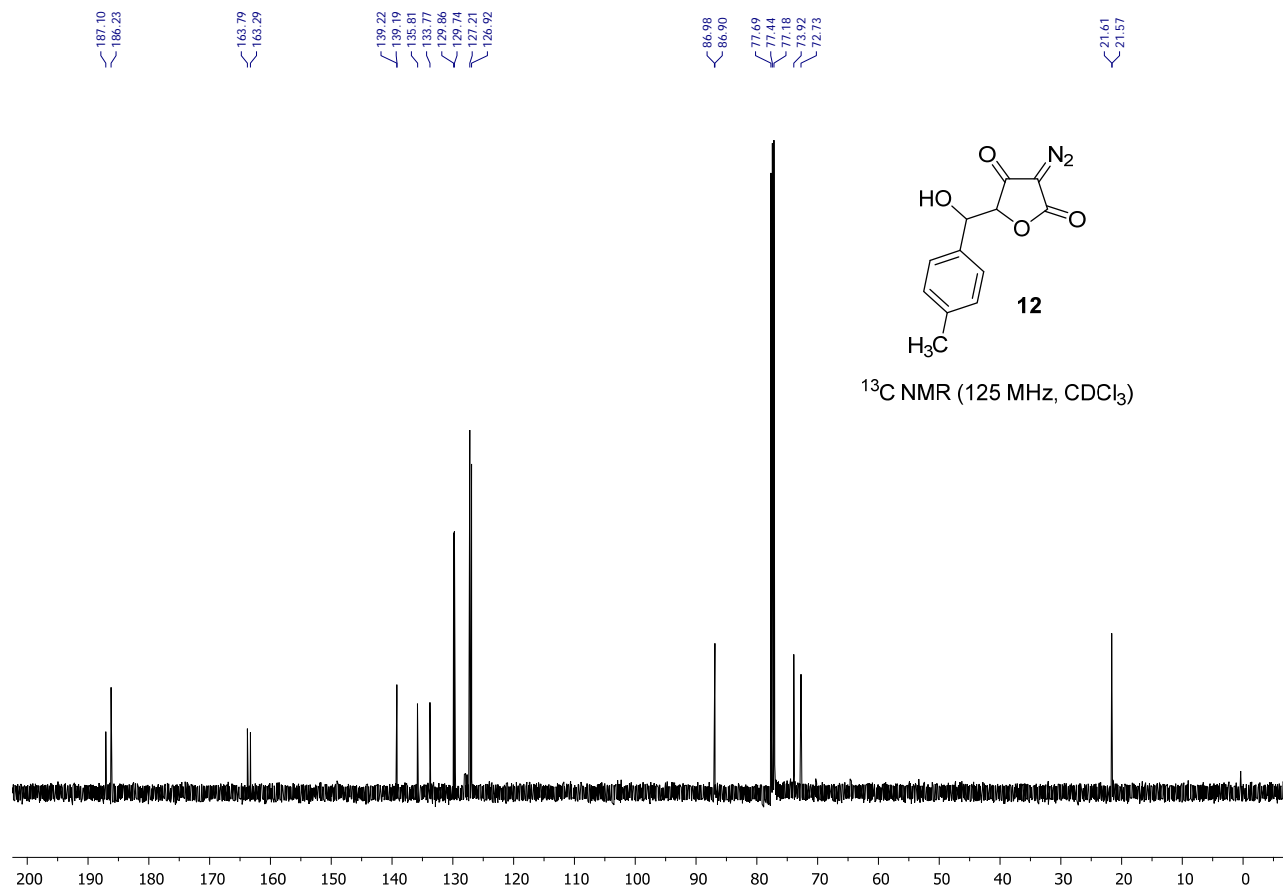

AM-10-193B

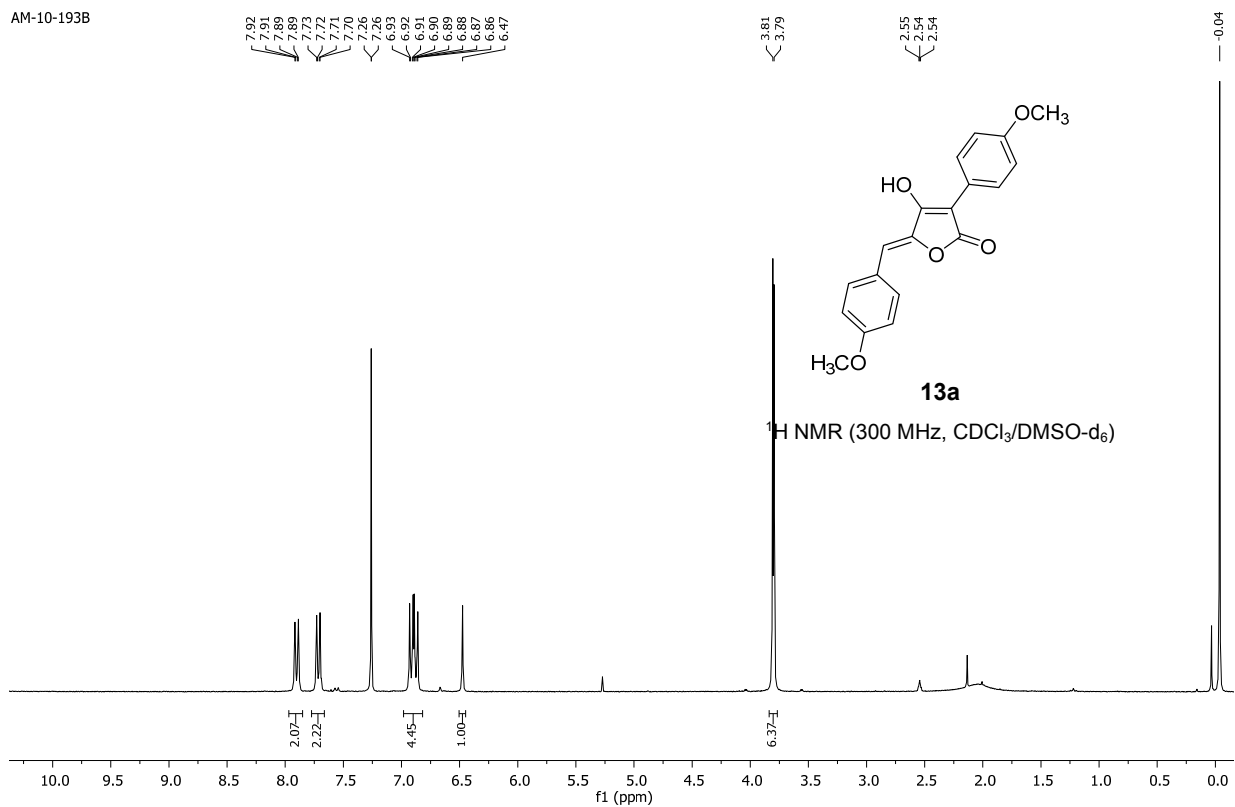

AM-10-193B

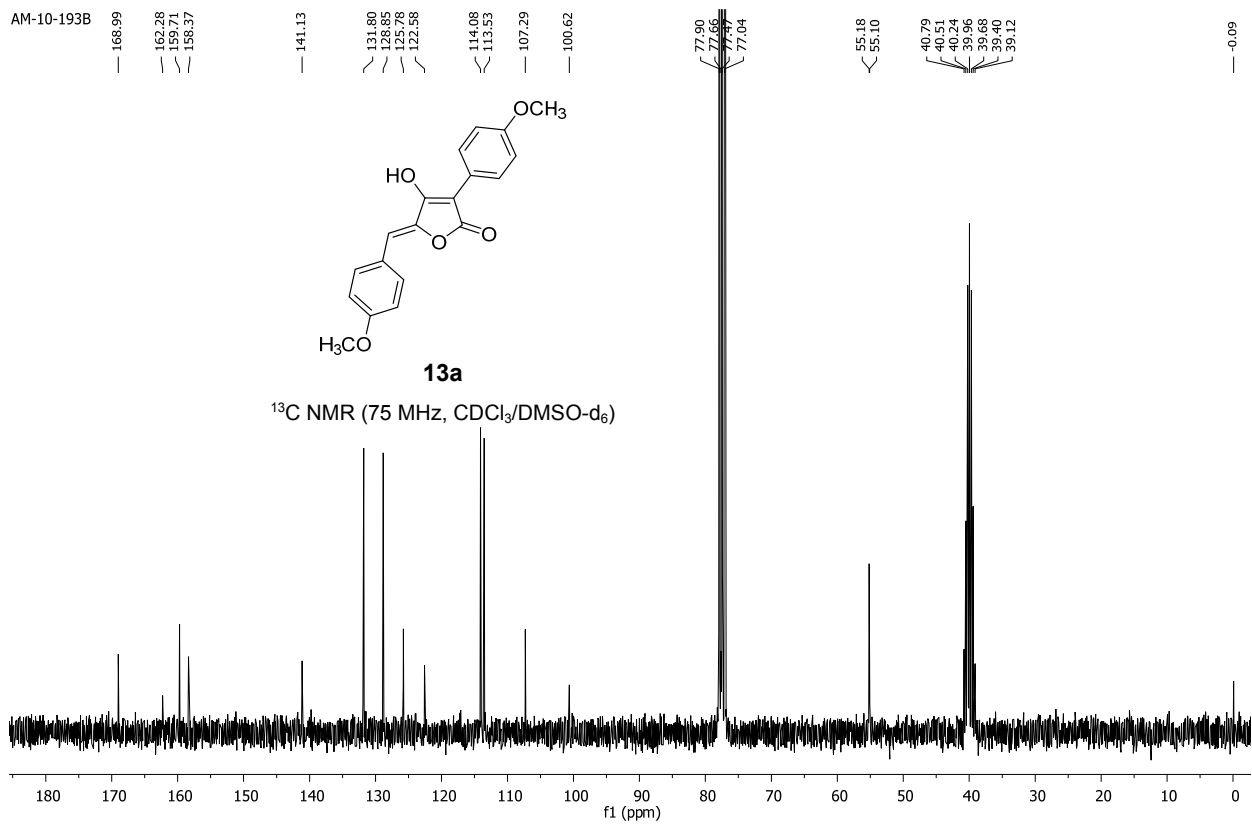

AM-11-49A

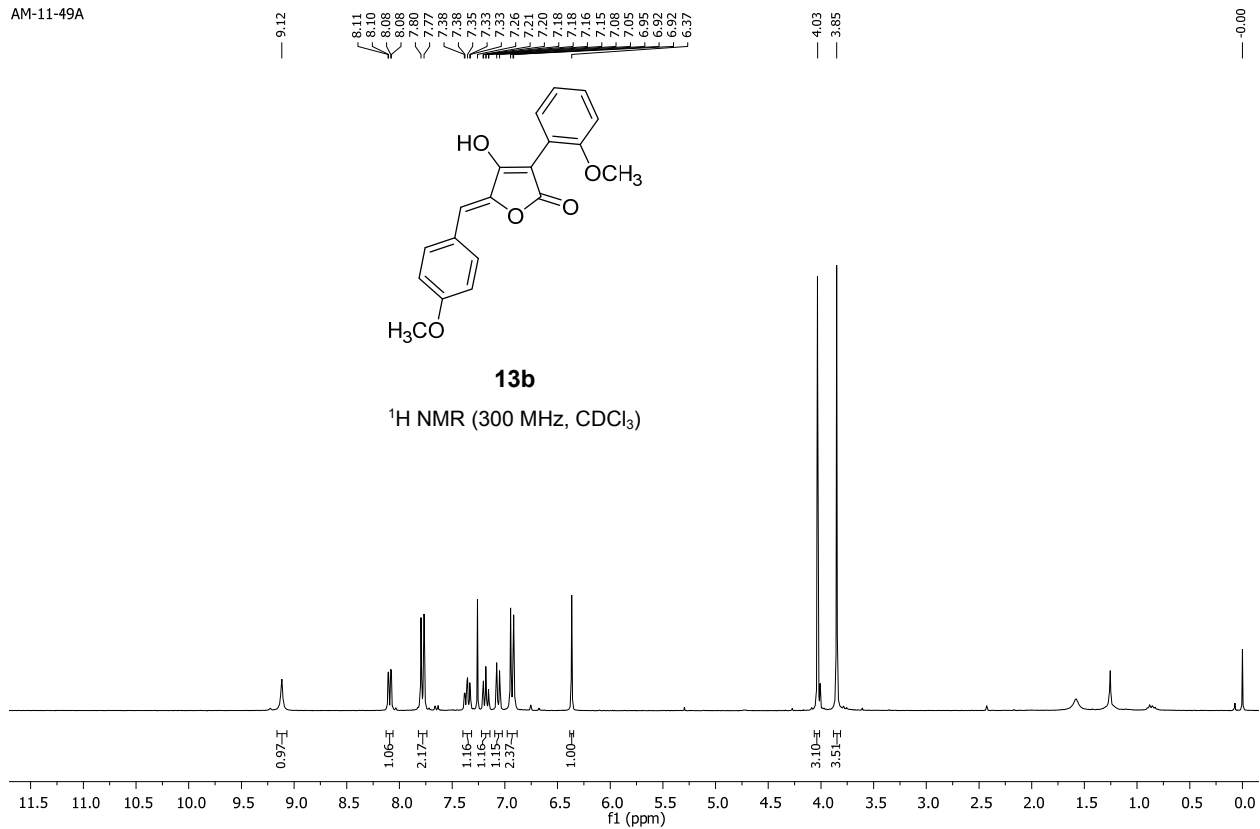

AM-11-49A

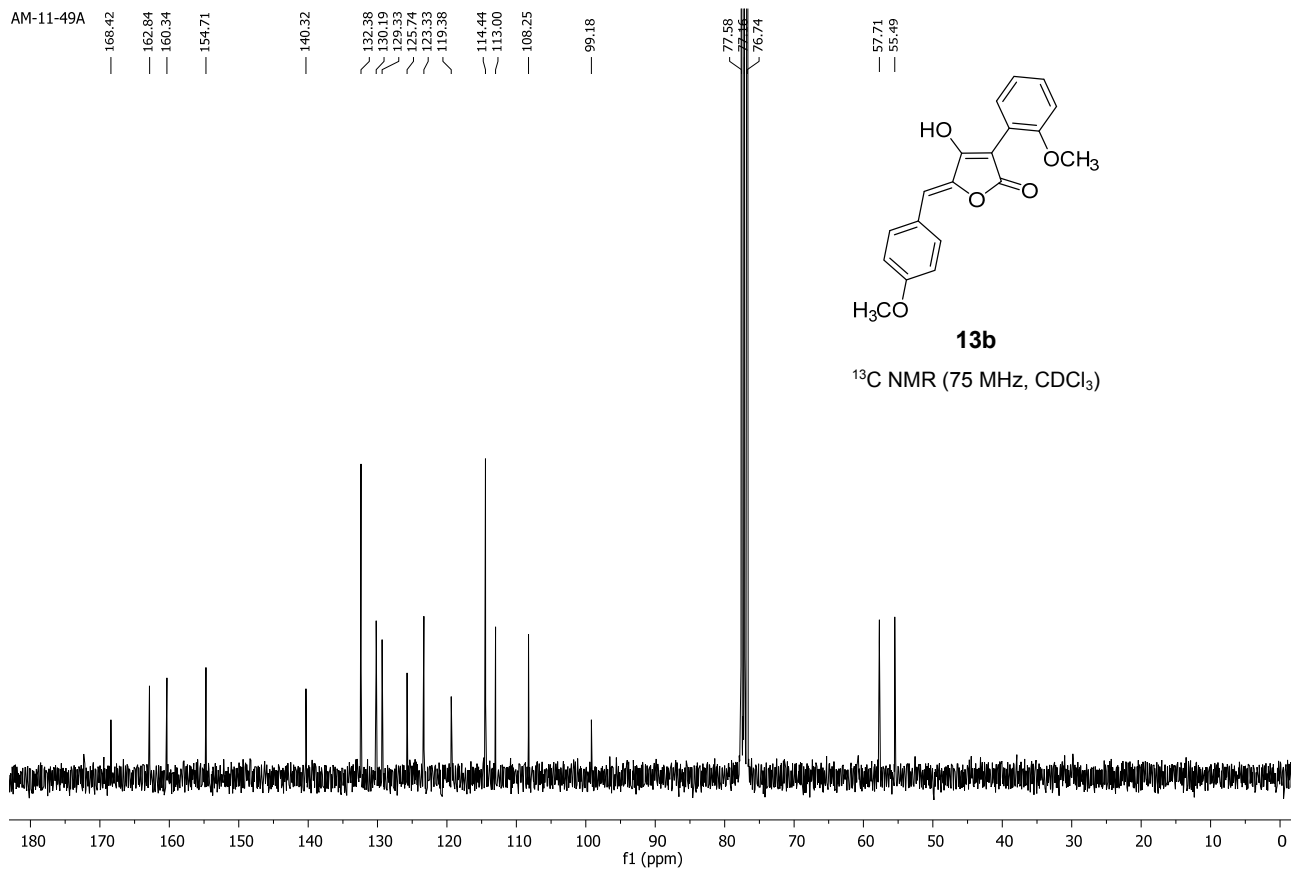

LD-01-35B

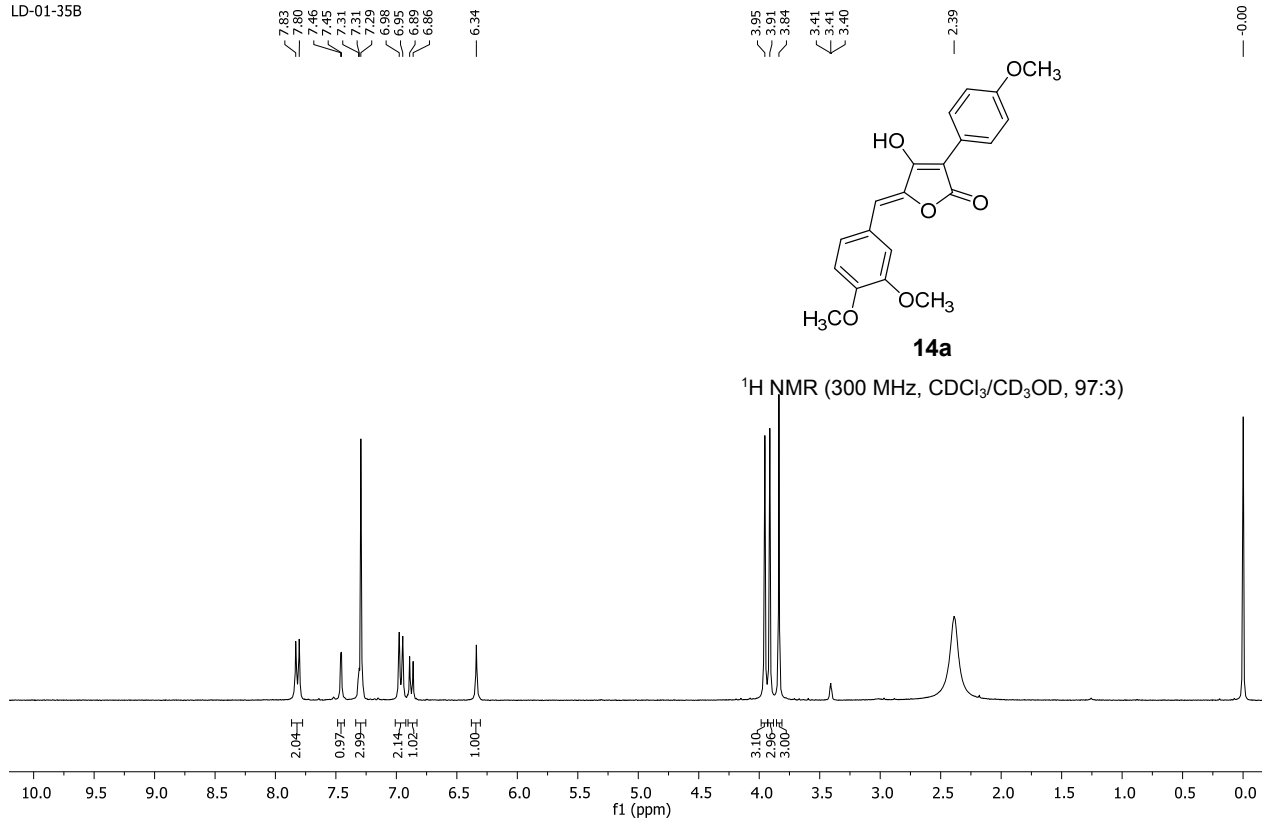

LD-01-35B

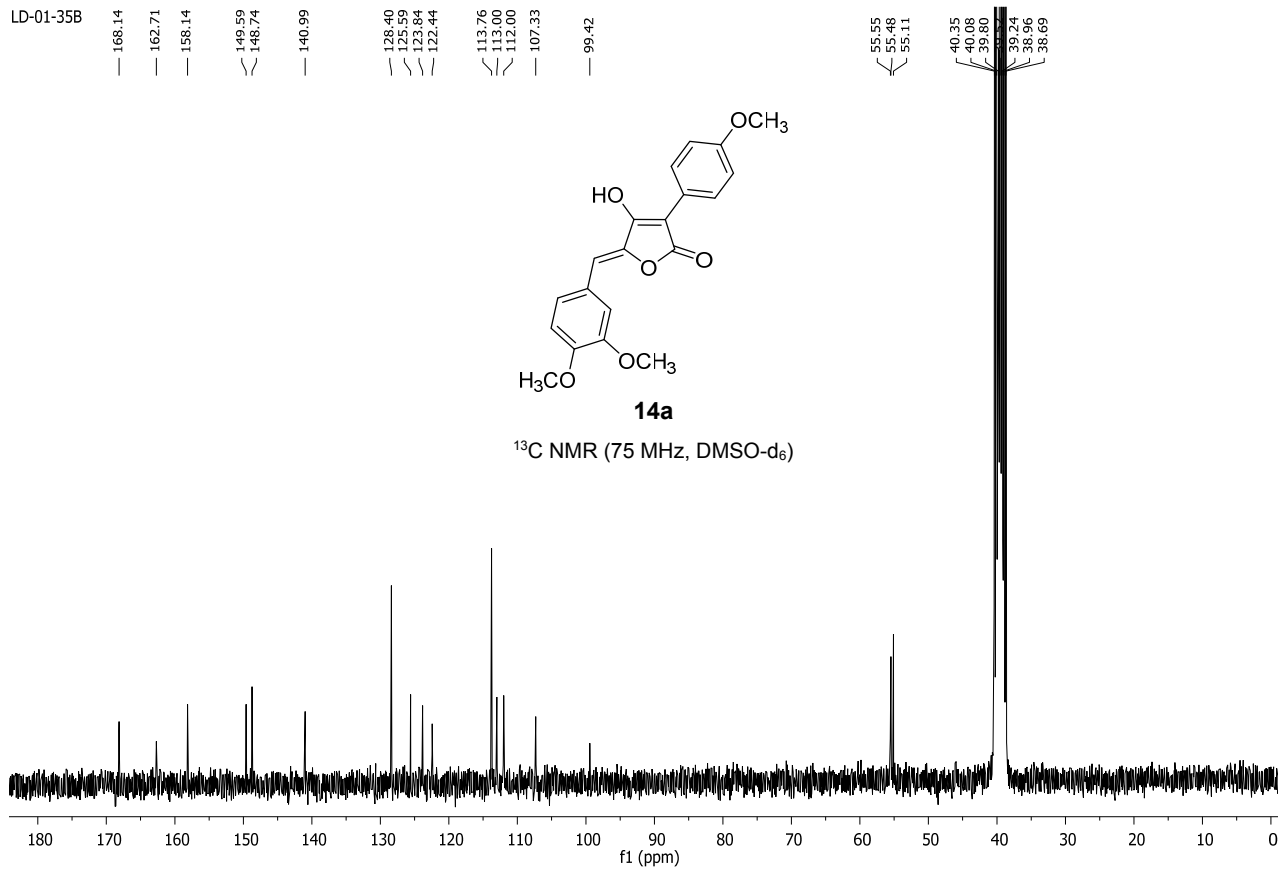

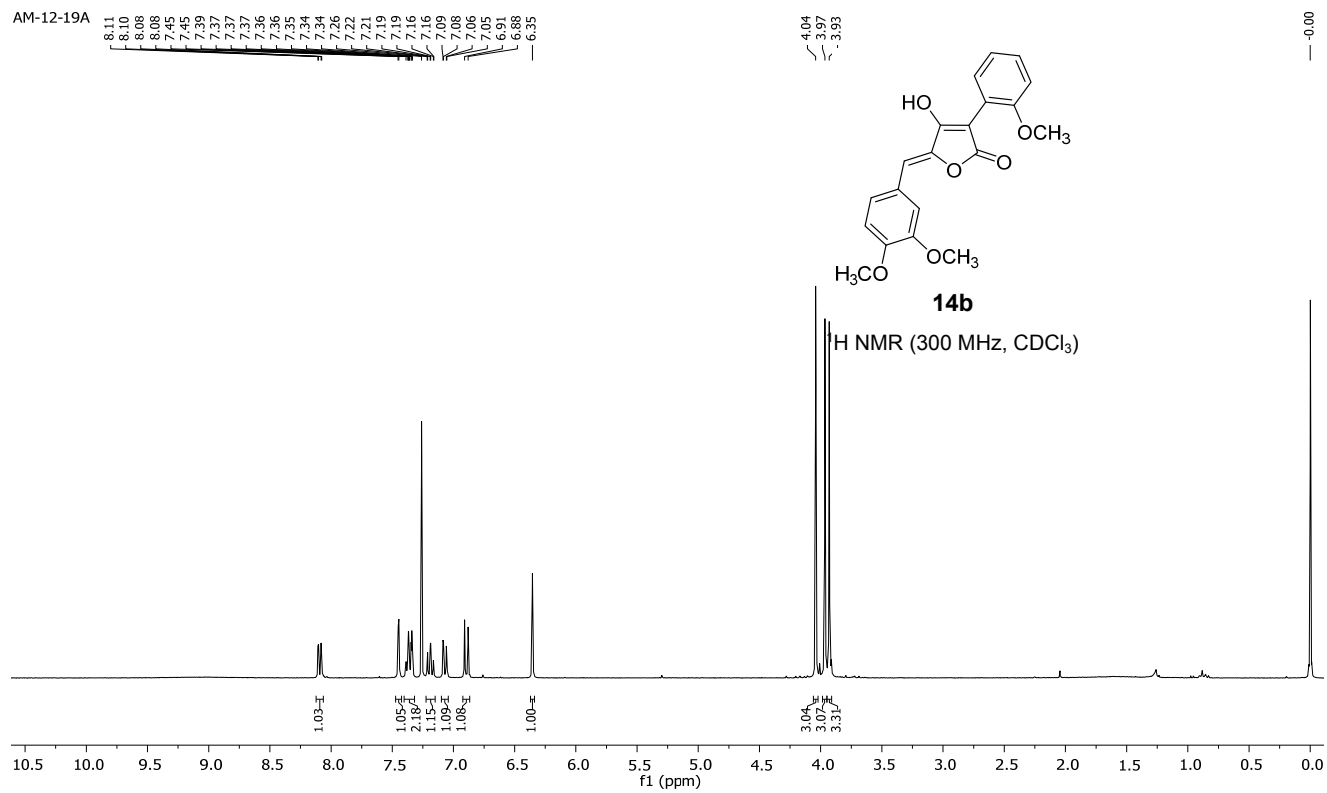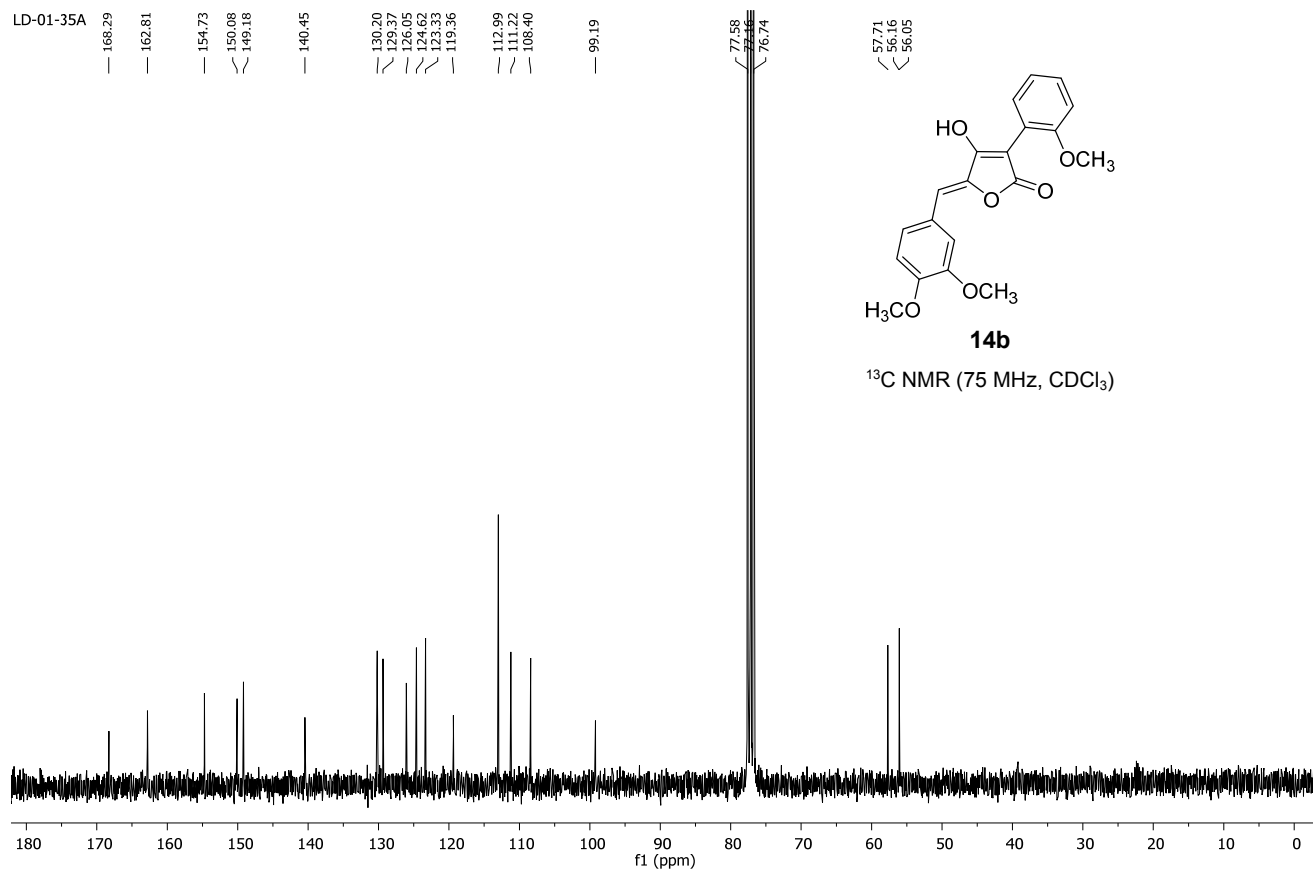

AM-10-195

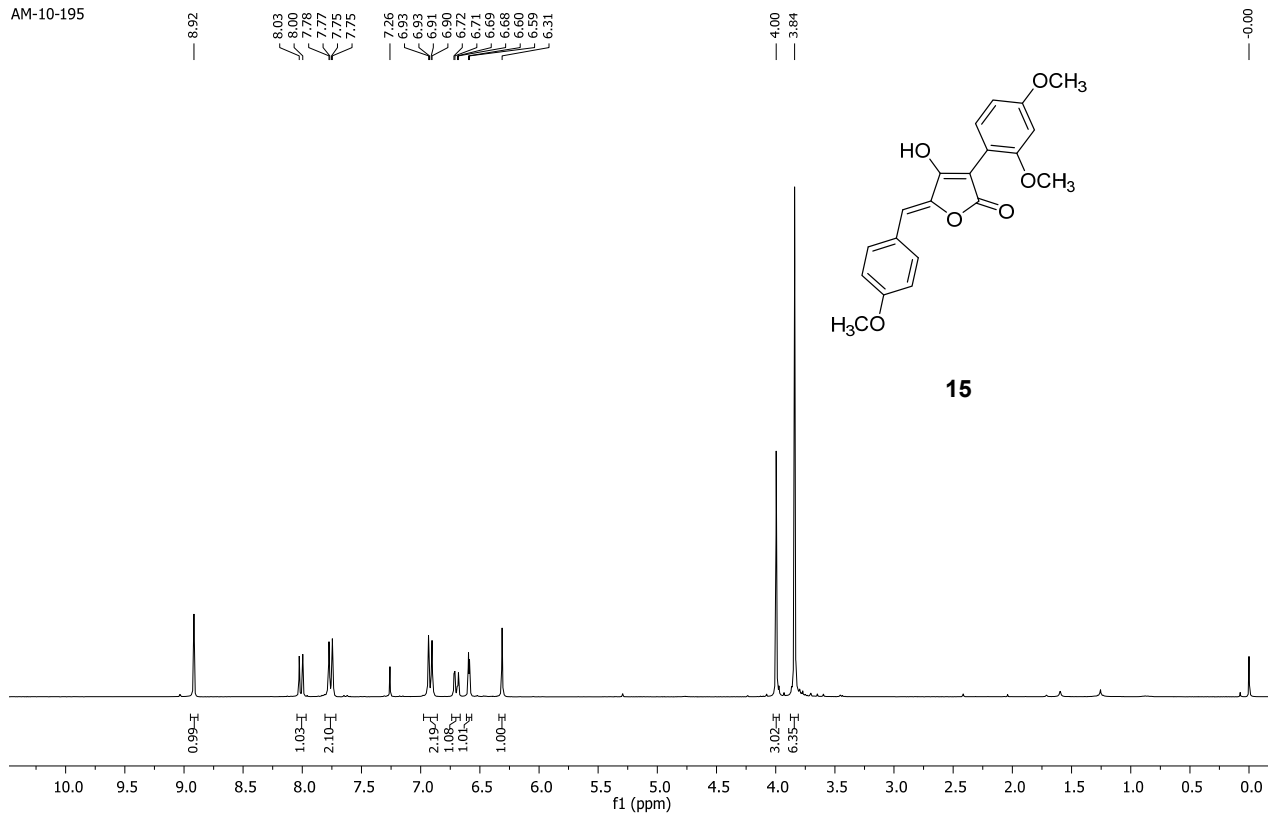

AM-10-195

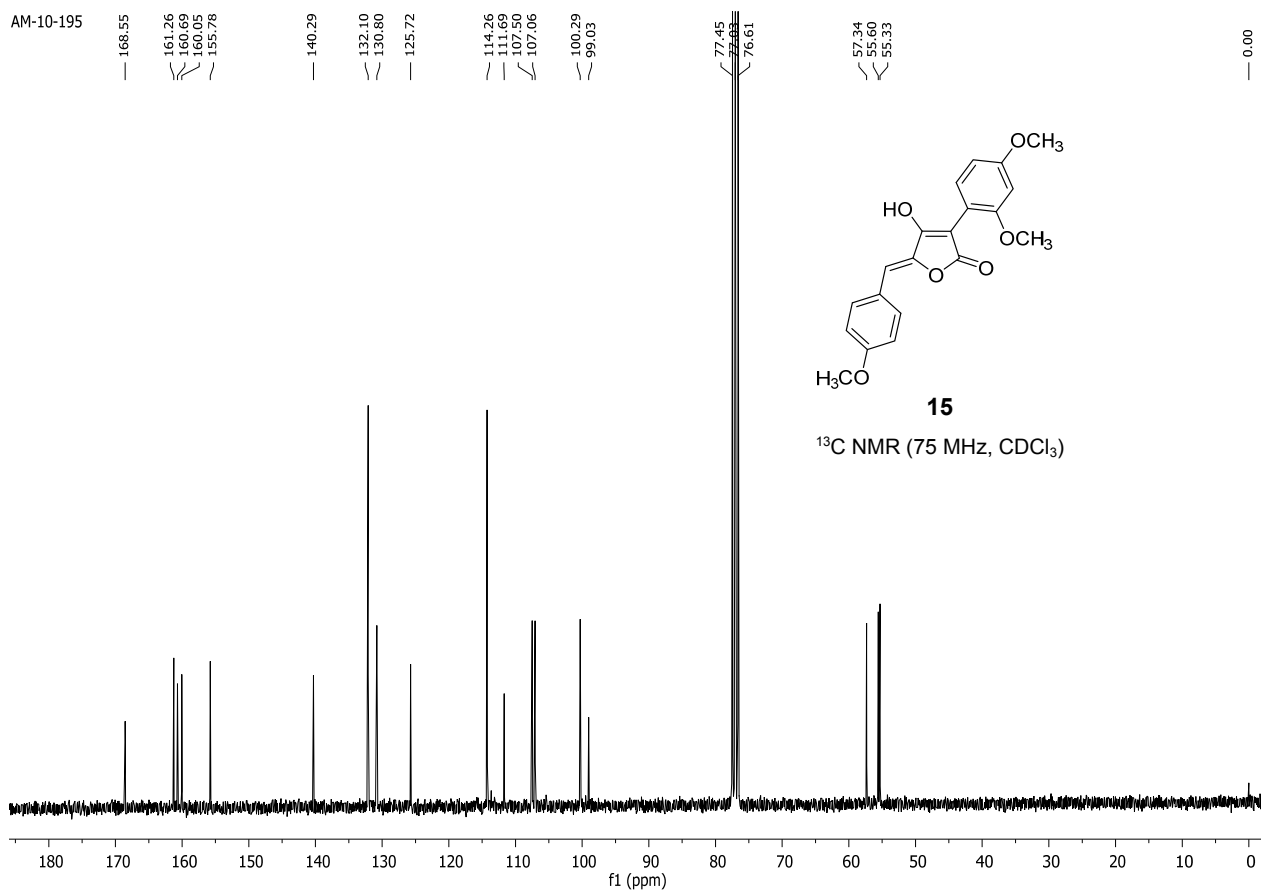





AM-11-19B

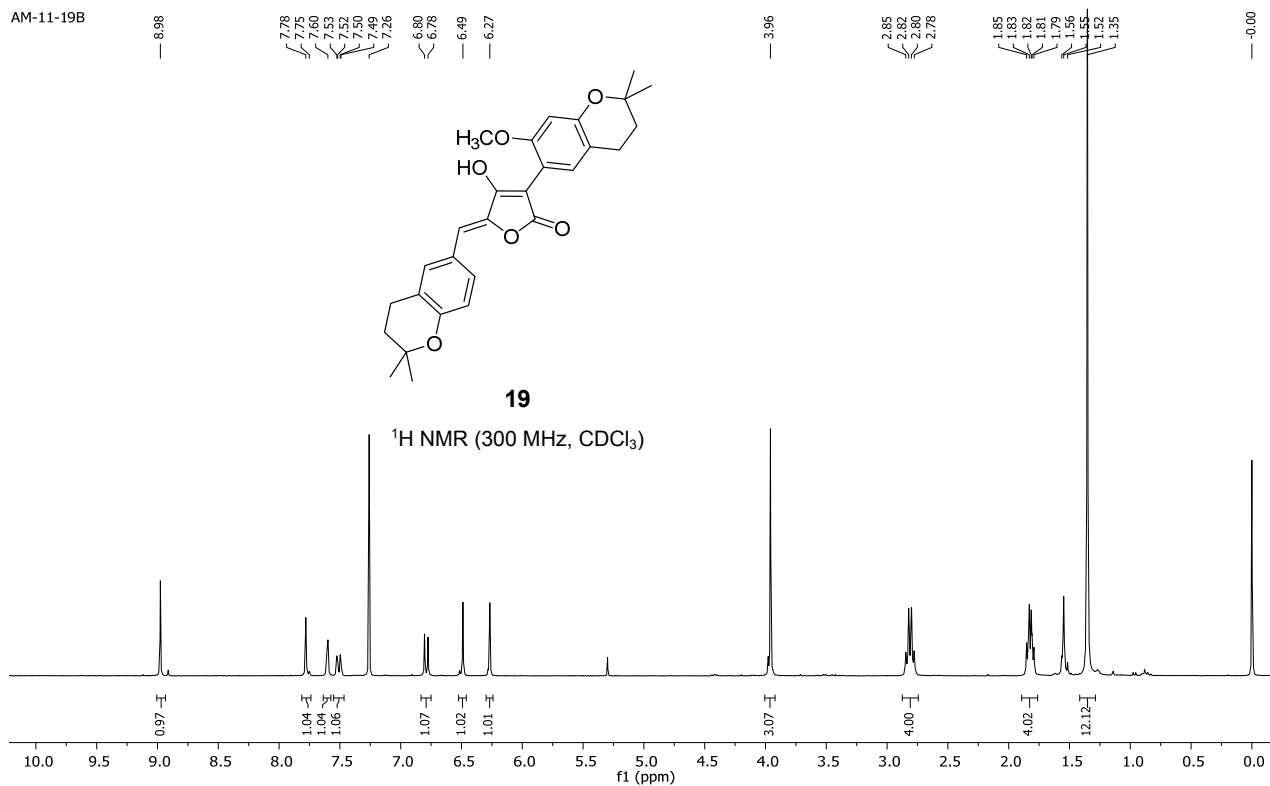

AM-11-19B

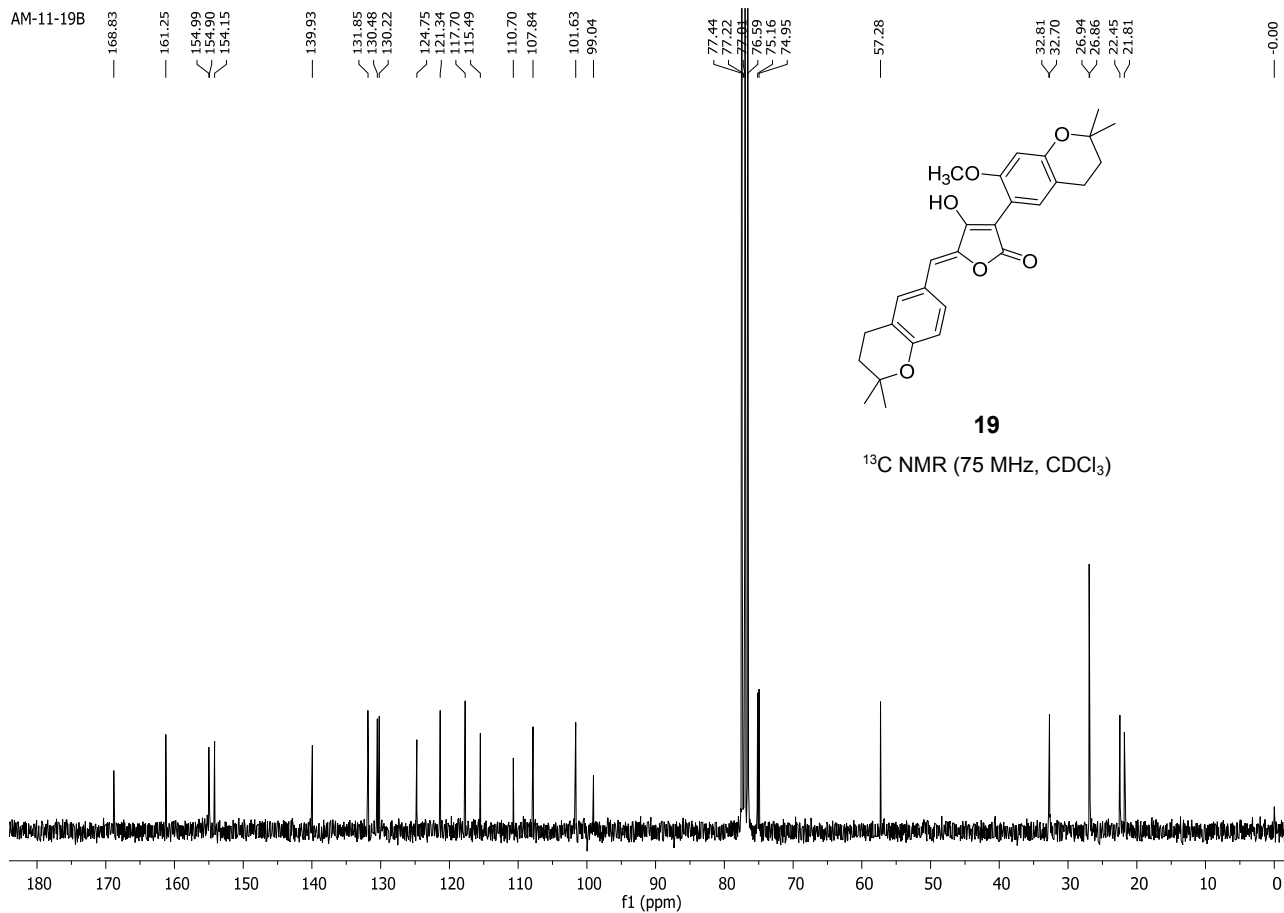

RAA-V-109

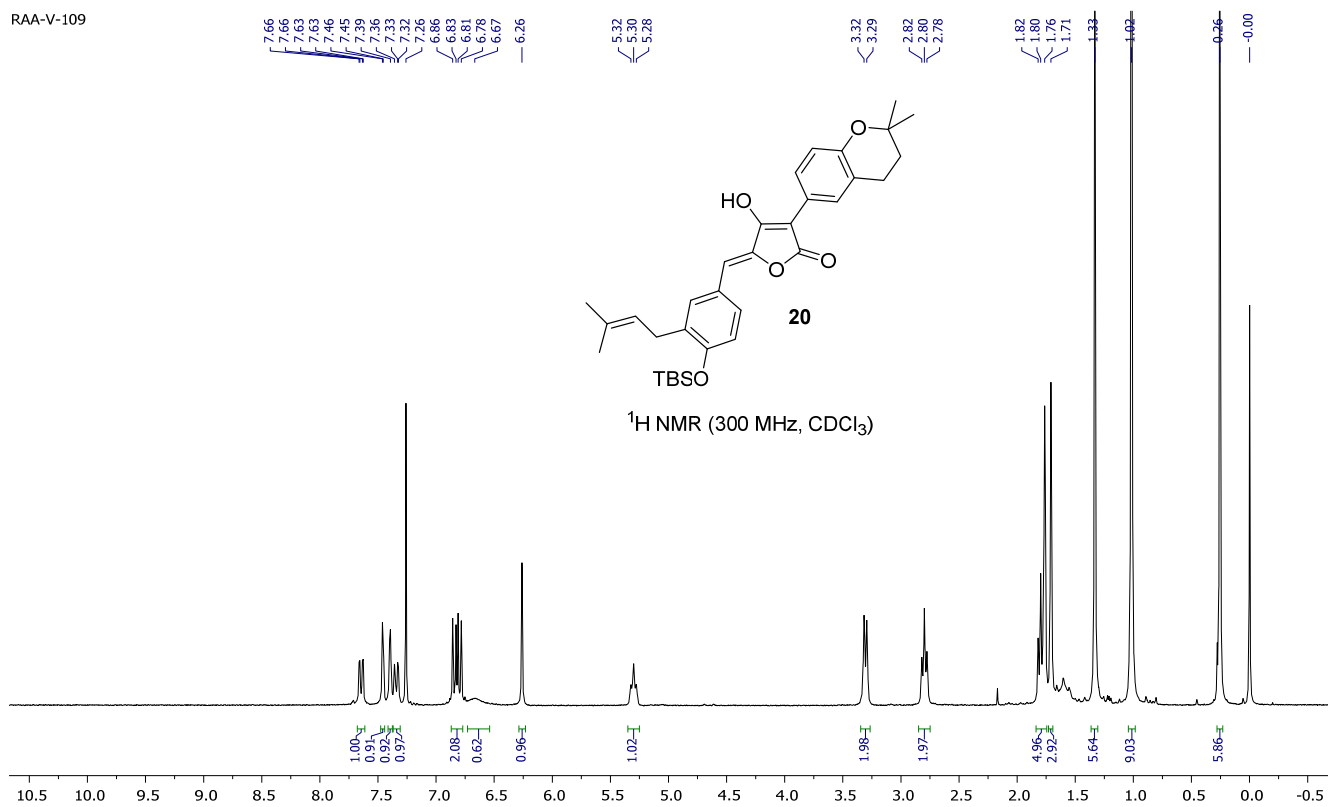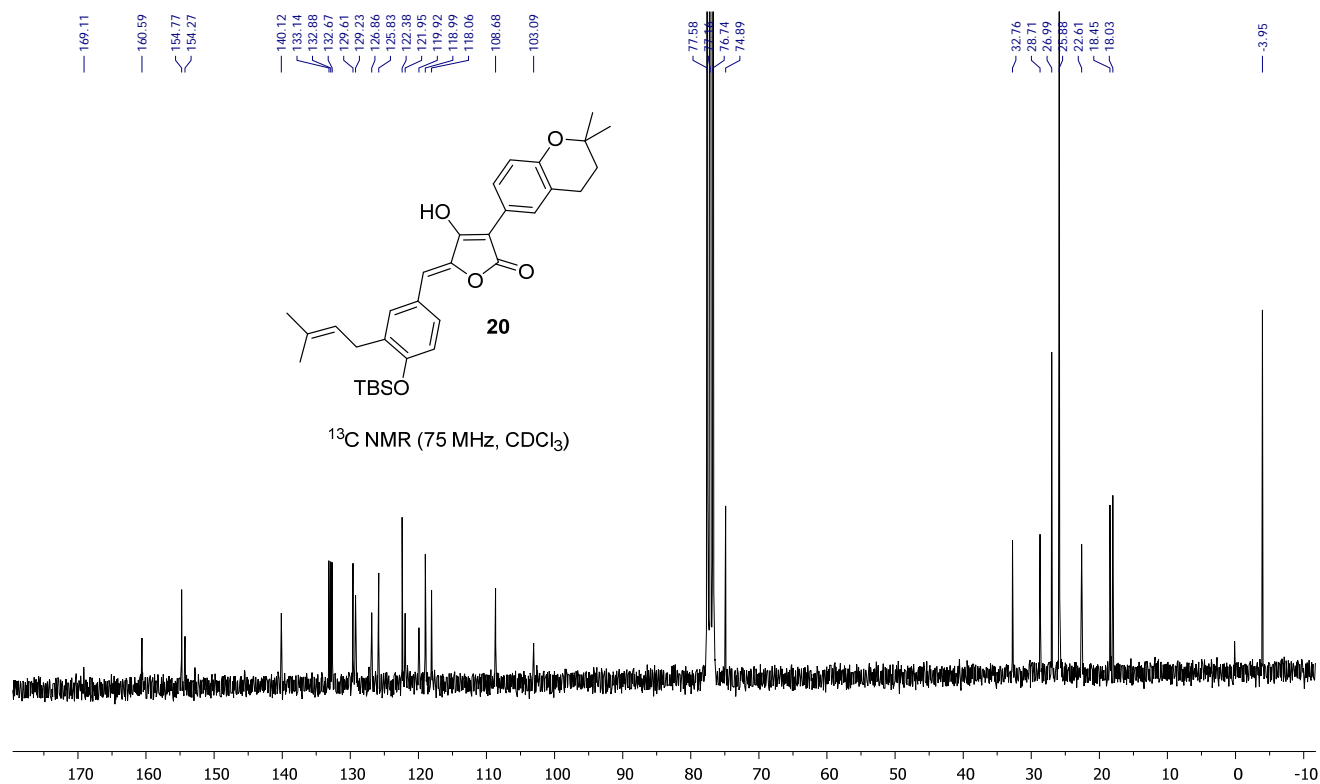

RAA-V-119.1.fid

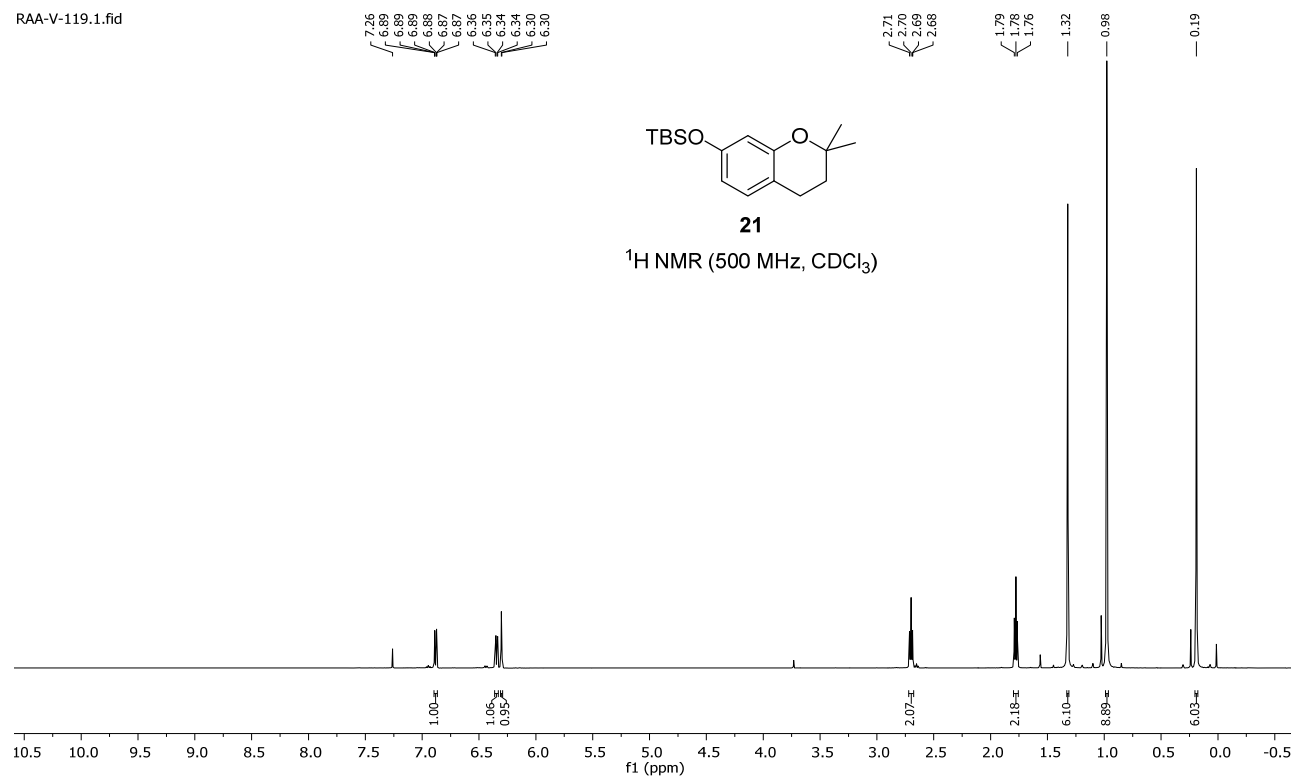

RAA-V-119 13C.1.fid

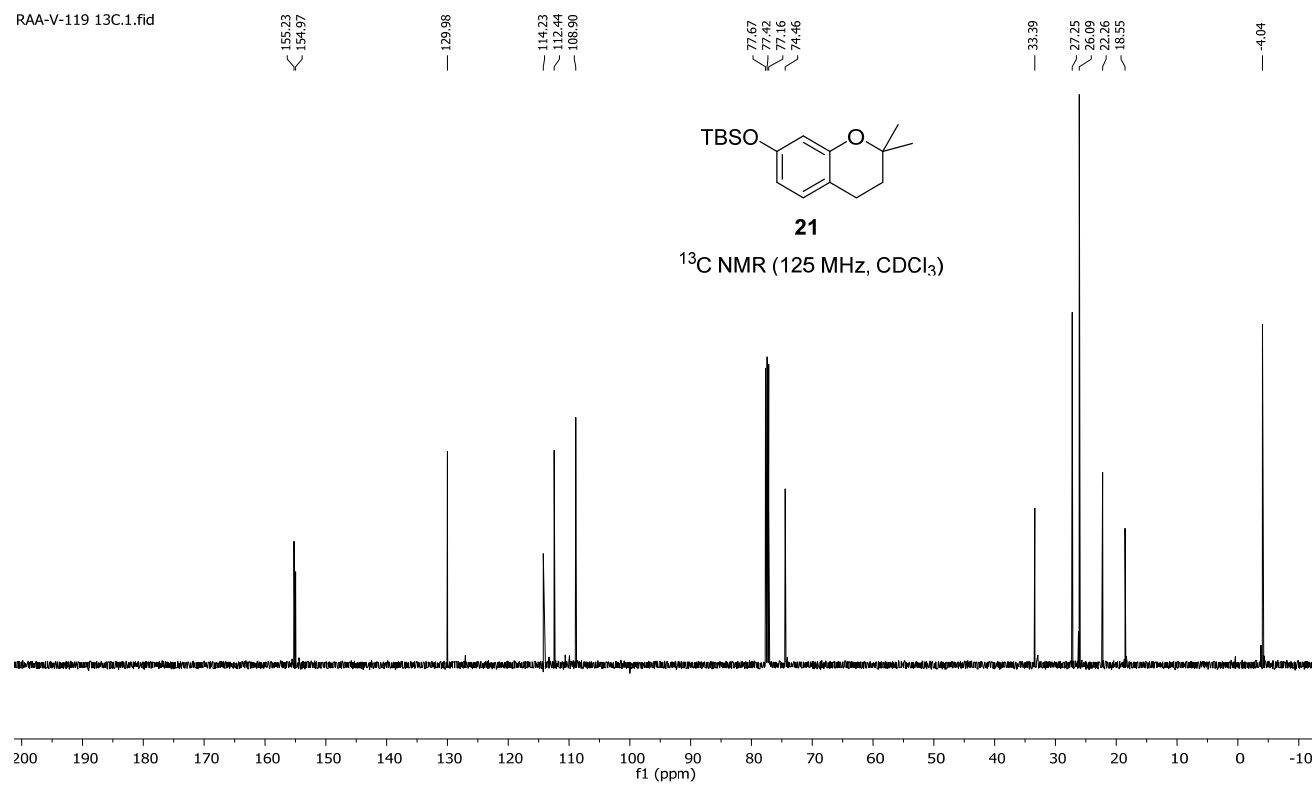

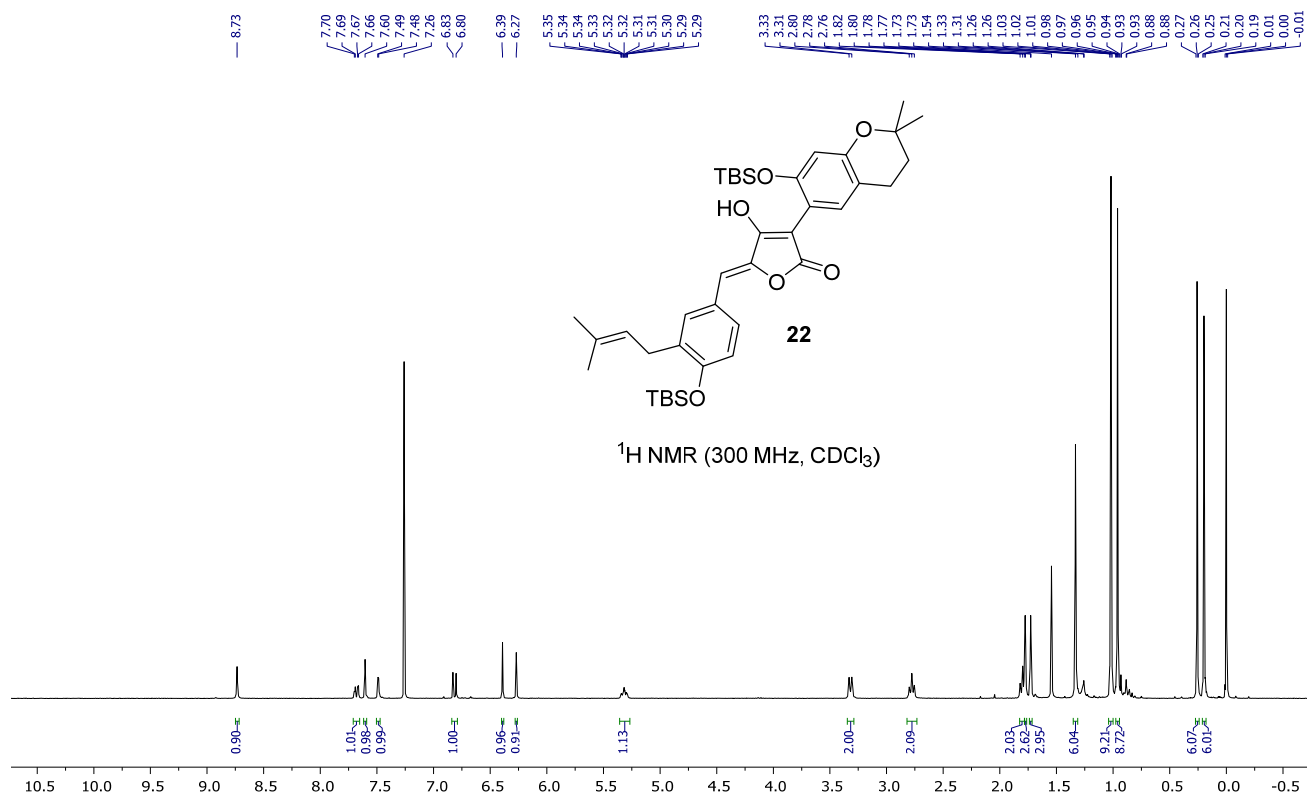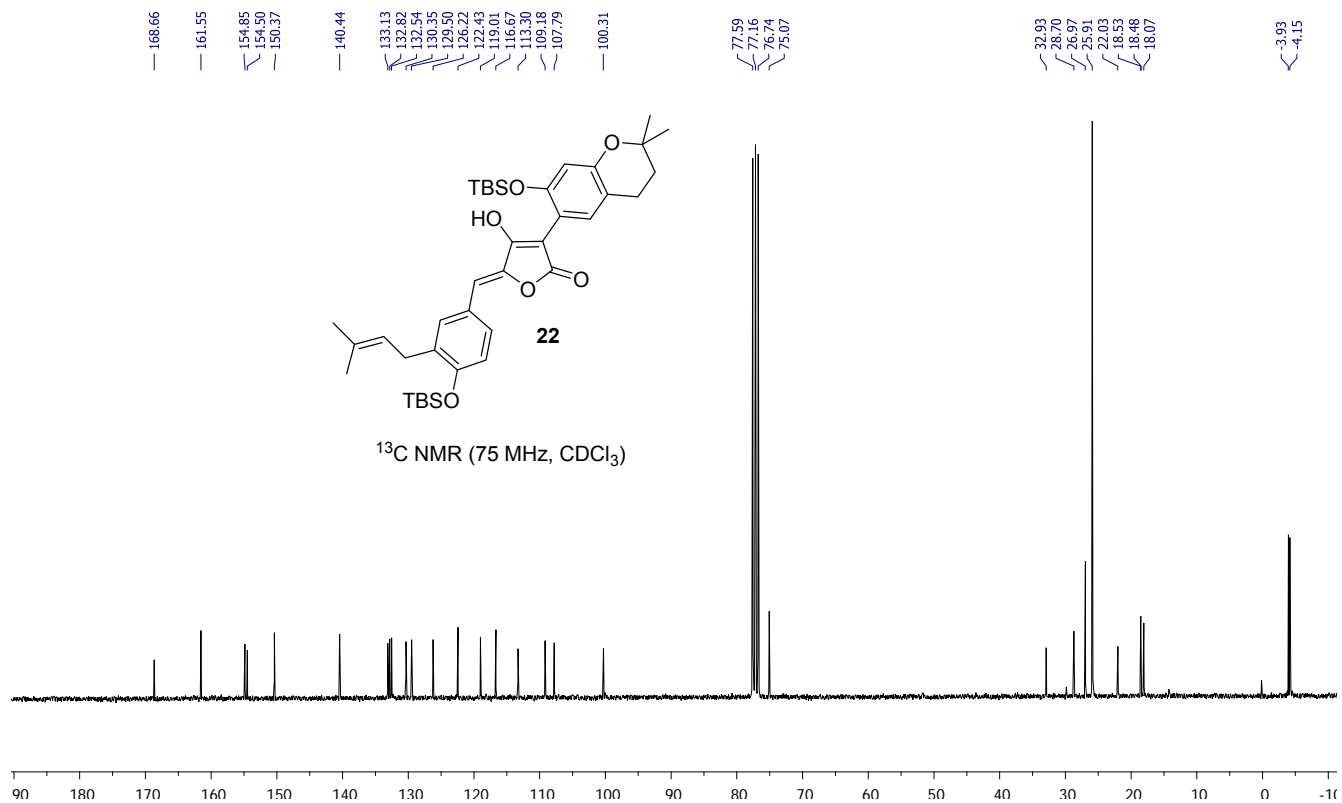

AM-12-13A

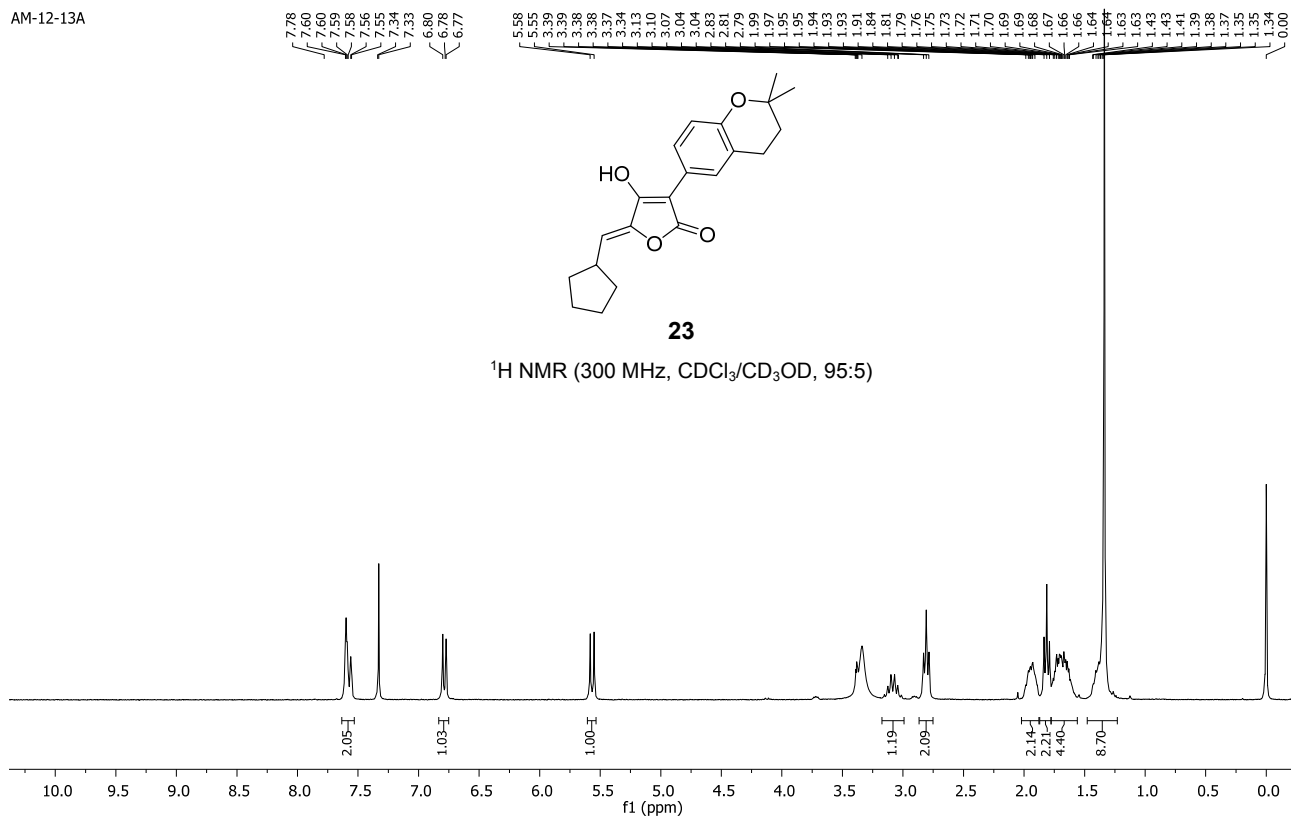

AM-12-13A

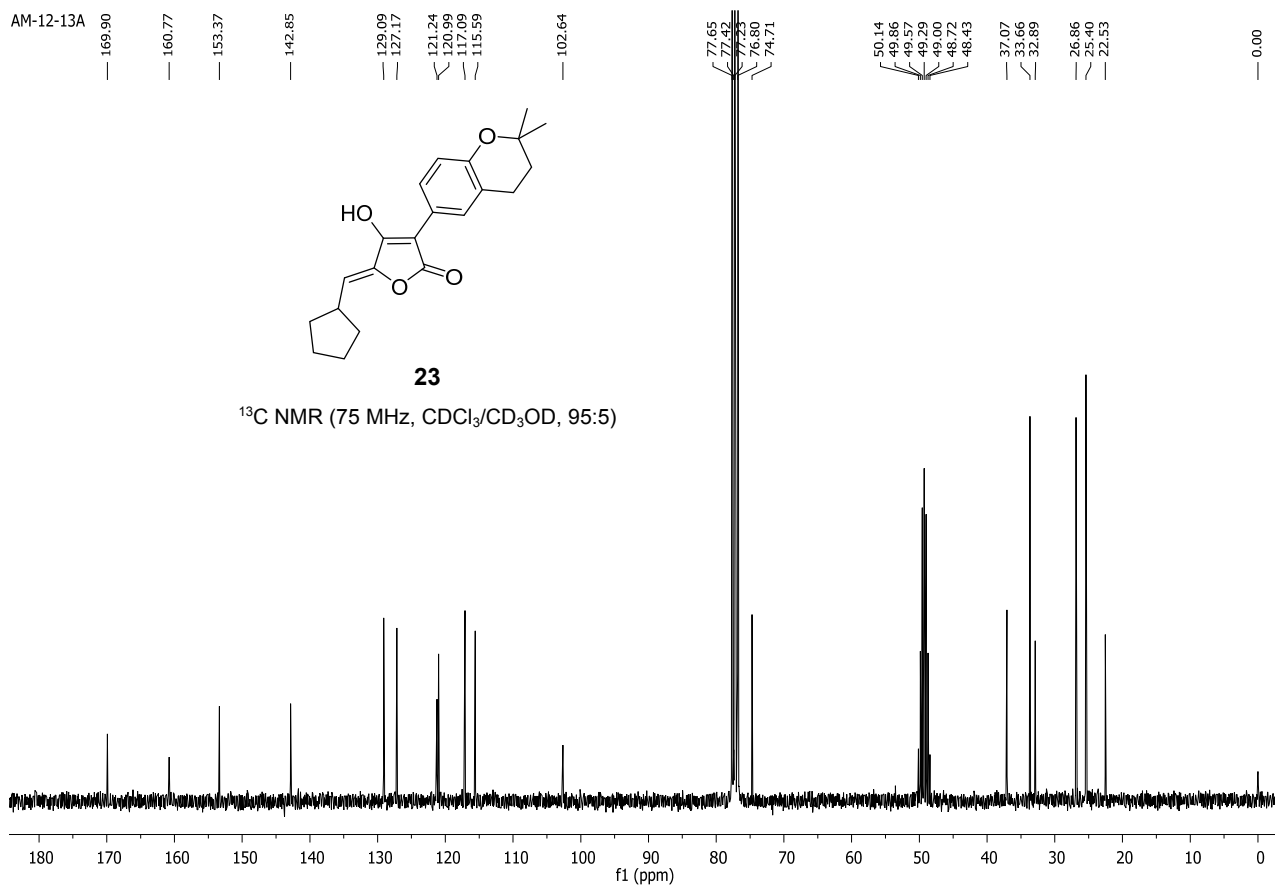

AM-12-11

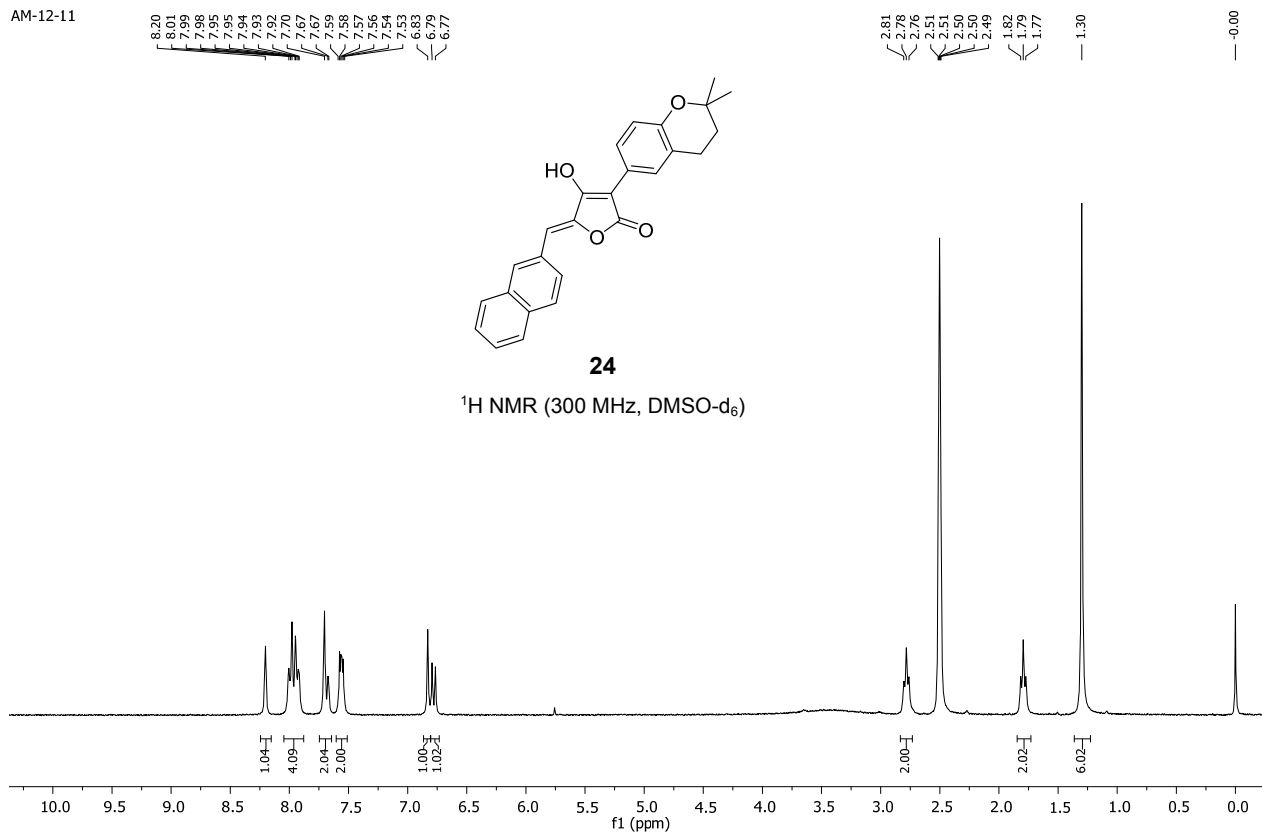

AM-12-11

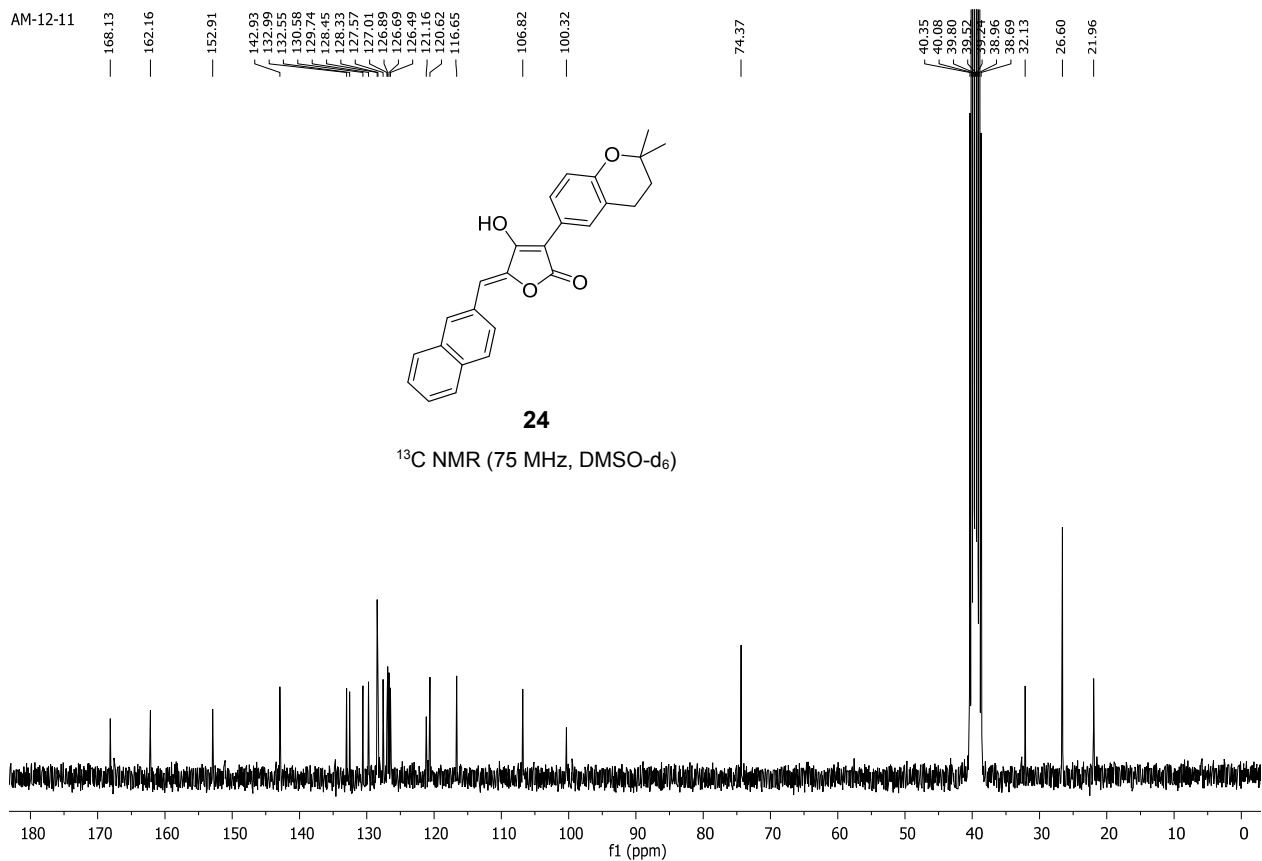

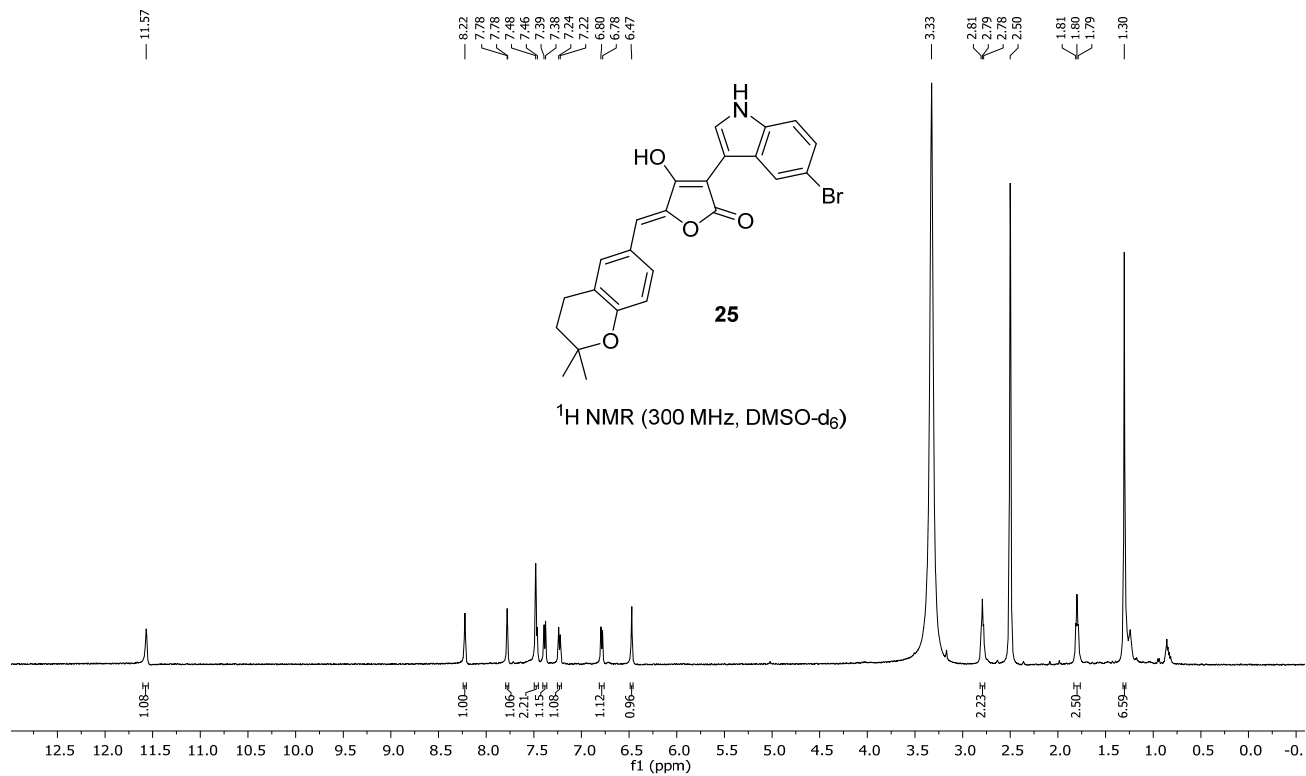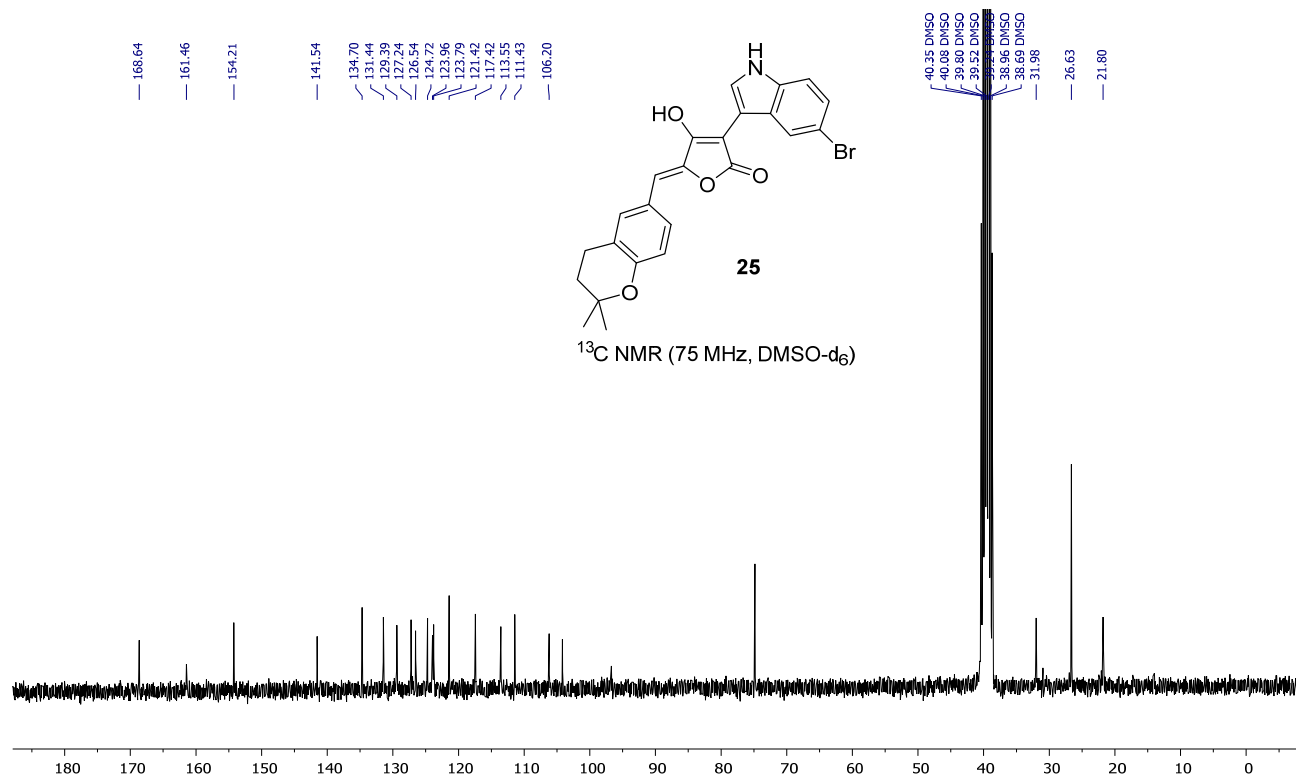

AM-10-163B  
 7.816  
 7.814  
 7.808  
 7.803  
 7.793  
 7.778  
 7.777  
 7.775  
 7.775  
 7.750  
 7.748  
 7.747  
 7.746  
 7.745  
 7.744  
 7.742  
 7.741  
 7.741  
 7.738  
 7.733  
 7.731

2.57  
 2.51  
 2.51  
 2.50  
 2.50

0.00

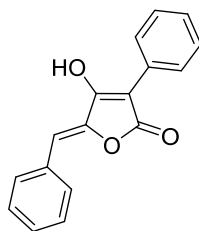

1

<sup>1</sup>H NMR (300 MHz, DMSO-d<sub>6</sub>)

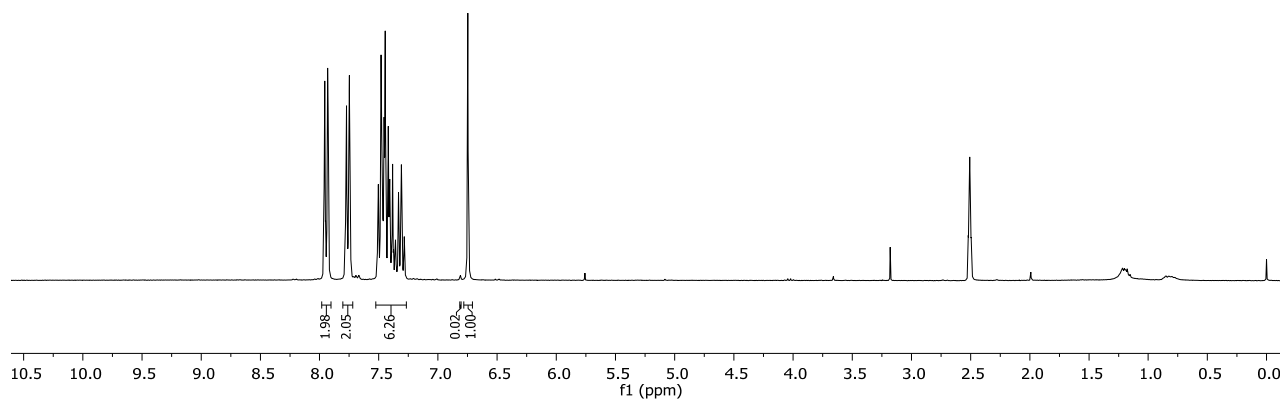

AM-10-163B

167.86  
 163.82

142.42  
 132.70  
 130.09  
 129.79  
 128.98  
 128.83  
 128.27  
 127.21  
 127.14

107.55  
 100.12

40.36  
 40.08  
 39.80  
 39.62  
 39.24  
 38.96  
 38.69

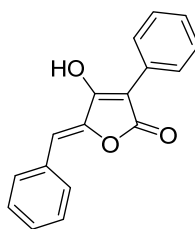

1

<sup>13</sup>C NMR (75 MHz, DMSO-d<sub>6</sub>)

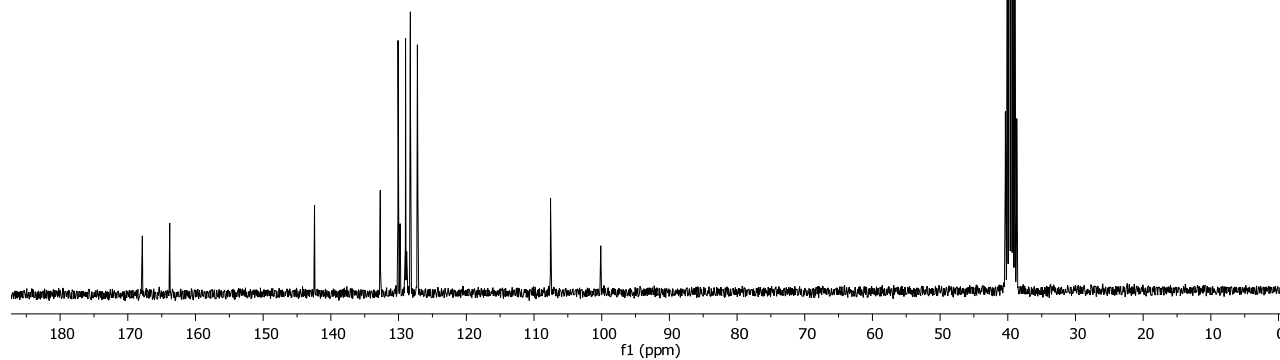



AM-11-195

7.76  
7.74  
7.73  
7.66  
7.64  
7.64

6.84  
6.84  
6.82  
6.81  
6.40

4.86

3.32  
3.32  
3.31  
3.30  
3.30

0.00

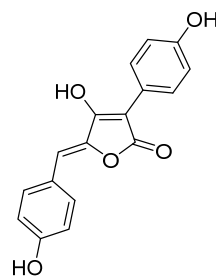

**2**

<sup>1</sup>H NMR (300 MHz, CD<sub>3</sub>OD)

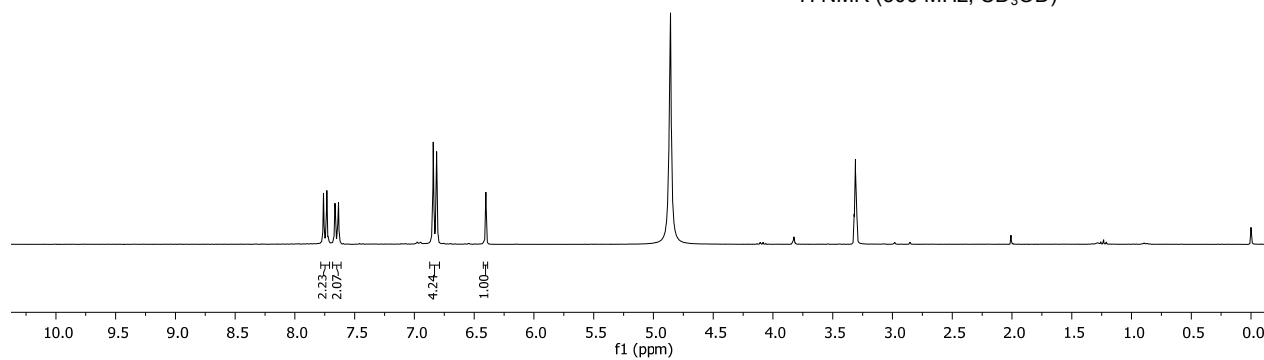

AM-11-195

171.22  
163.30  
159.71  
157.94

141.82

133.29

130.26

125.89

122.28

116.75

116.09

108.92

102.47

49.85  
49.57  
49.28  
49.00  
48.72  
48.43  
48.15

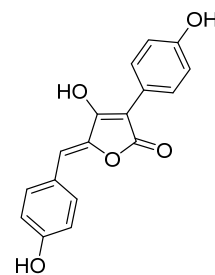

**2**

<sup>13</sup>C NMR (75 MHz, CD<sub>3</sub>OD)

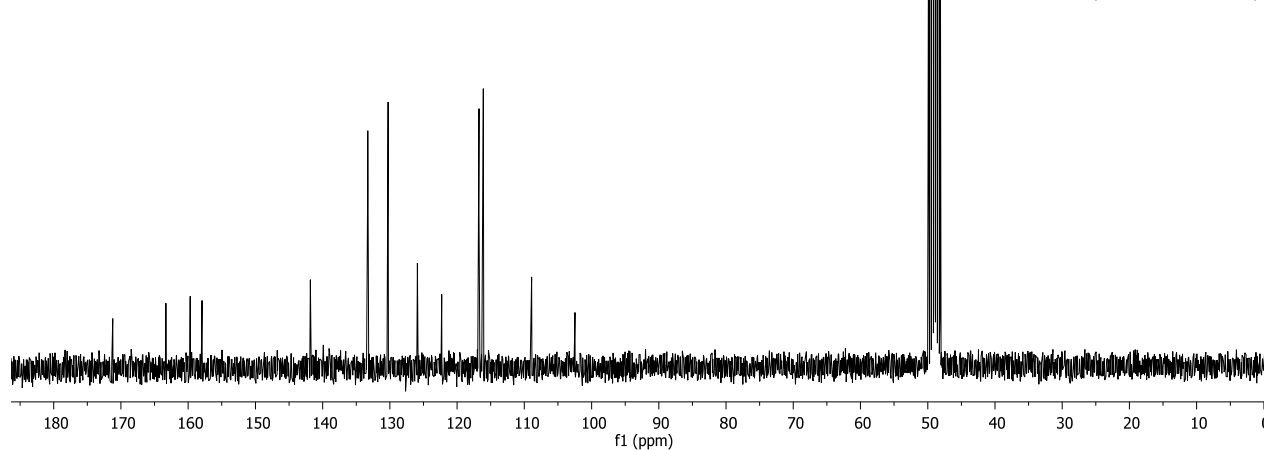

AM-11-109

7.66  
7.63  
7.60  
7.59

6.83  
6.82  
6.45  
6.44  
6.42  
6.32

4.86

3.31  
3.31  
3.30

0.00

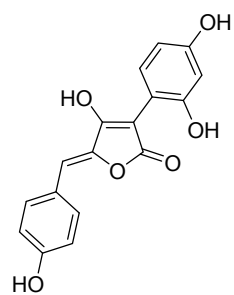

3

<sup>1</sup>H NMR (300 MHz, CD<sub>3</sub>OD)

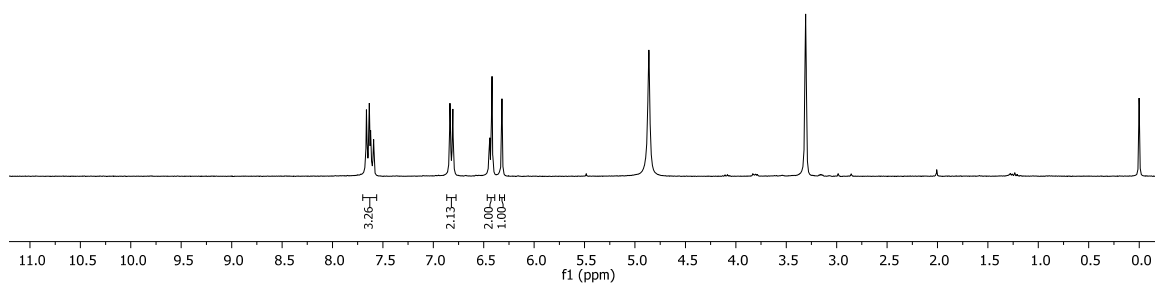

AM-11-109

171.35

163.58  
159.90  
159.66  
155.66

141.81

133.27  
131.66

126.05

116.77

109.56  
109.08  
108.48

103.85

100.09

48.90  
48.62  
48.33  
48.77  
48.48  
48.20

0.00

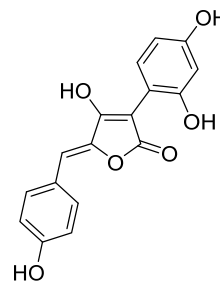

3

<sup>13</sup>C NMR (75 MHz, CD<sub>3</sub>OD)

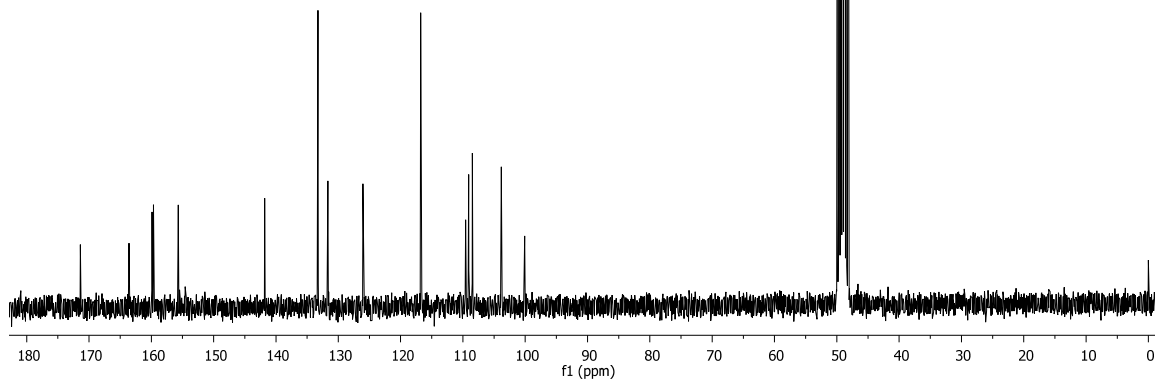

AM-12-23

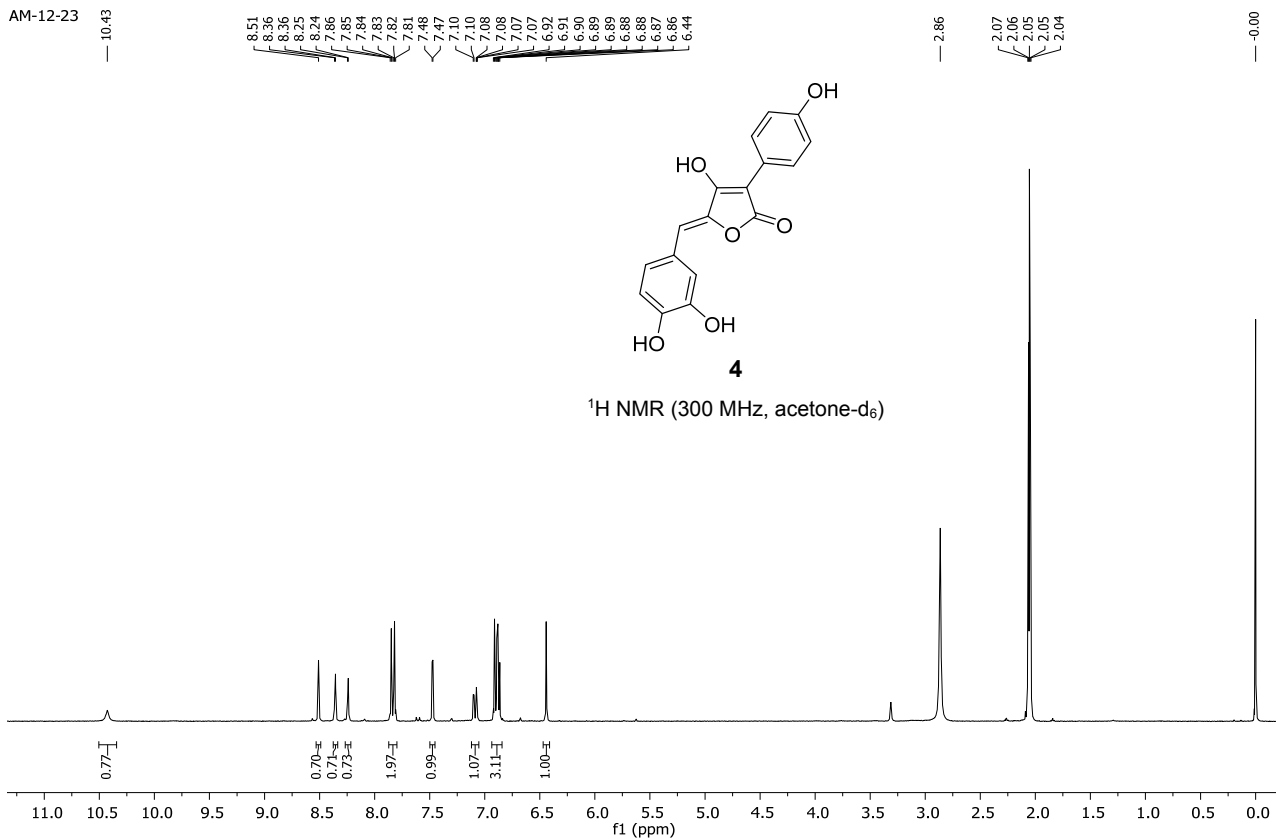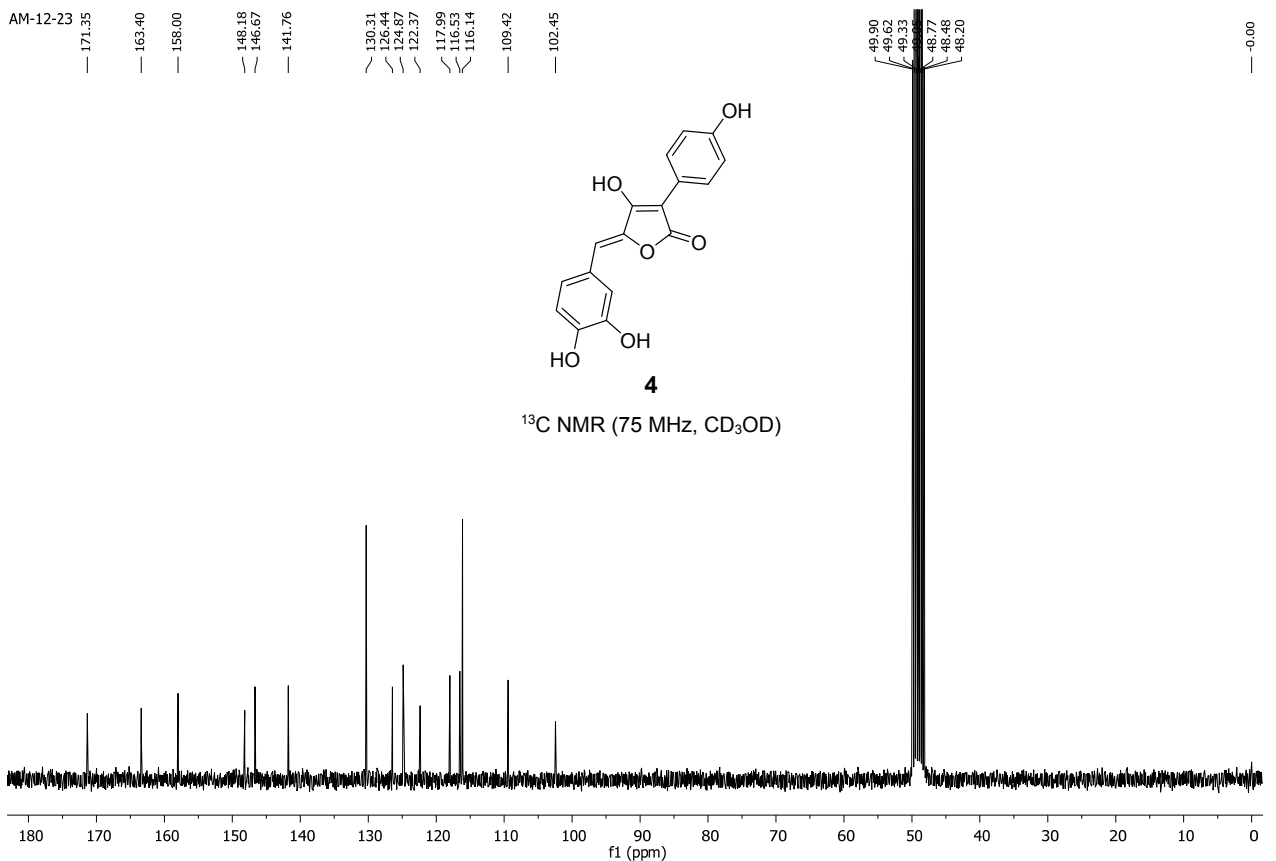

RAA-VI-029.1.fid

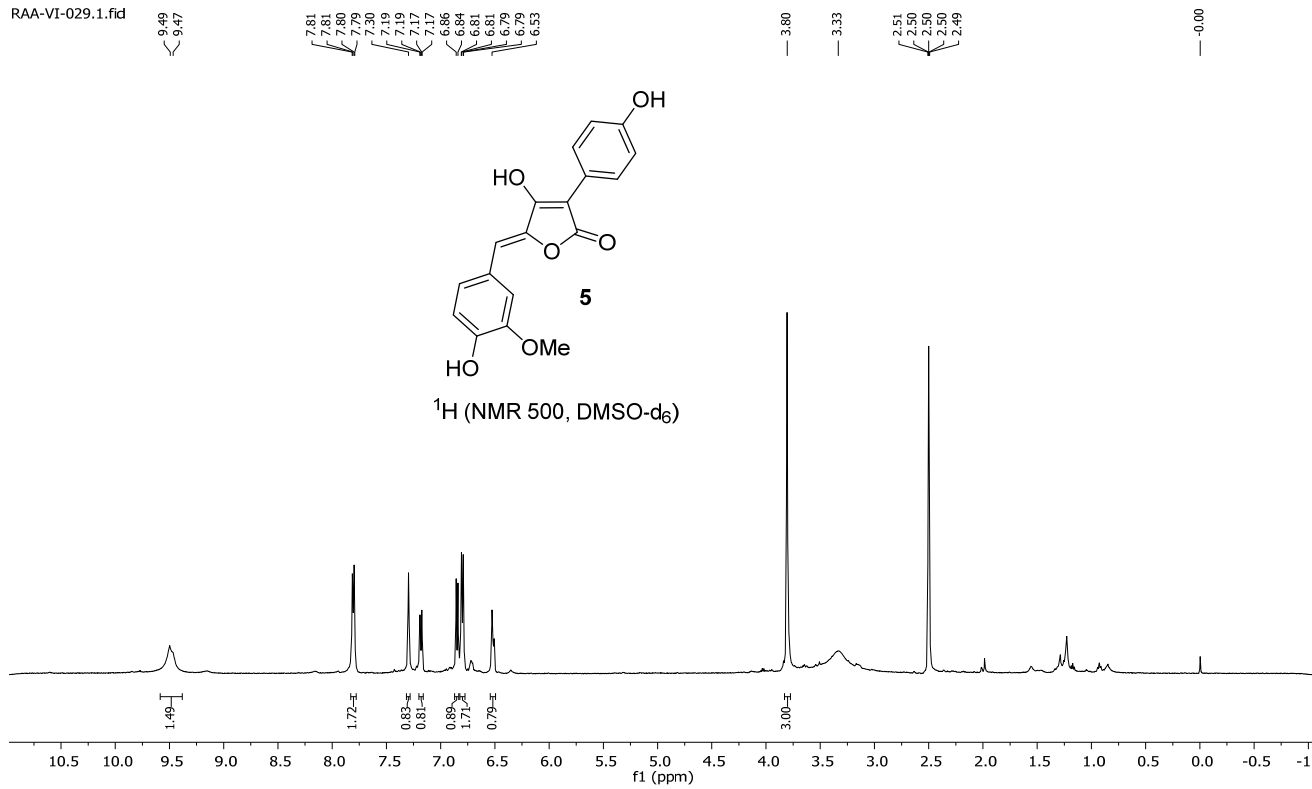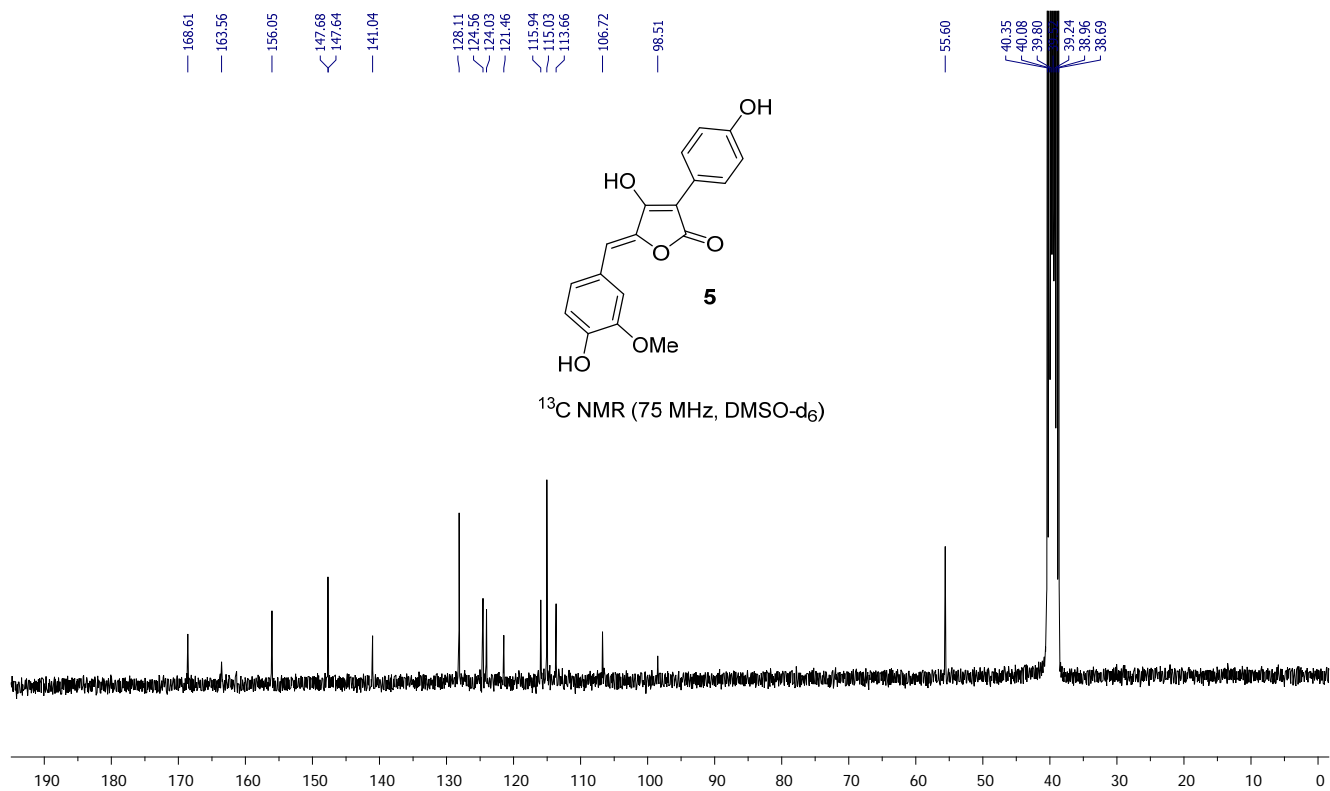

AM-11-21C

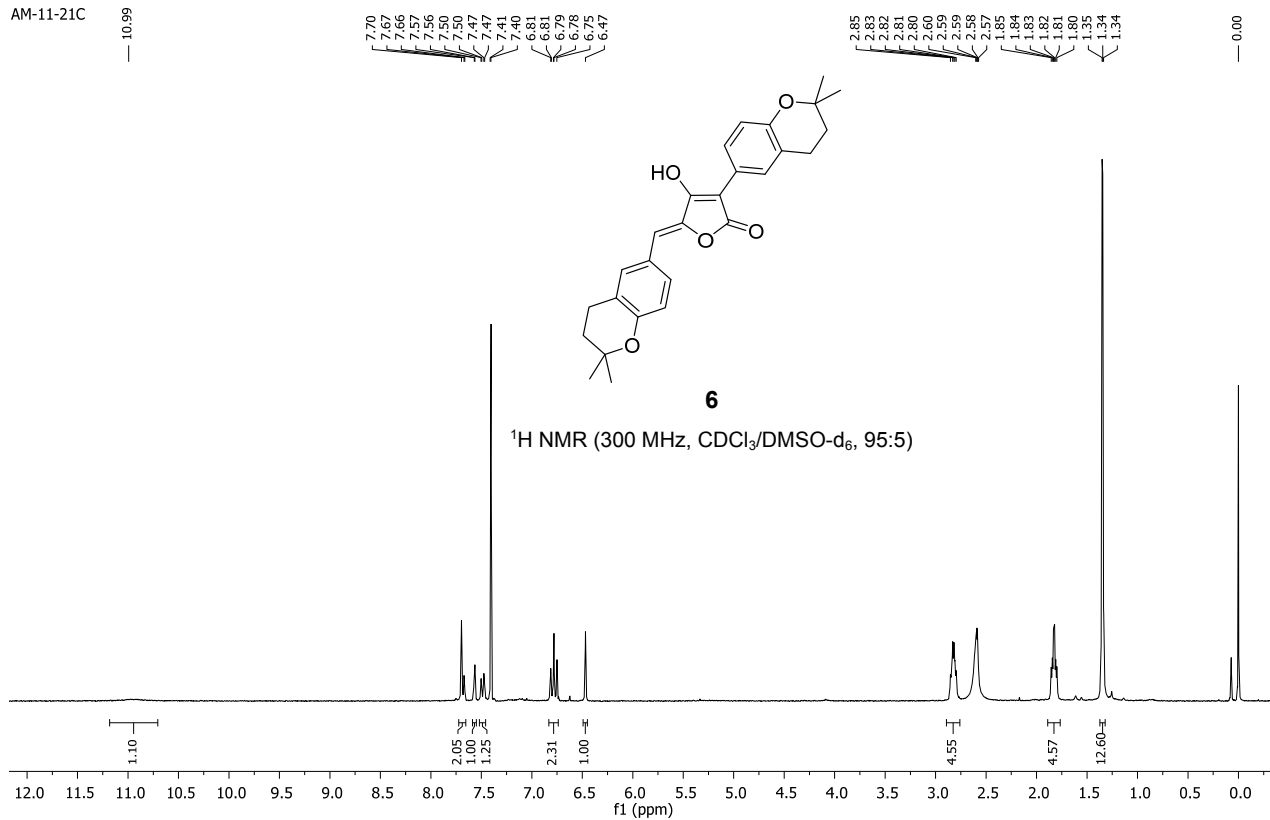

AM-11-21C

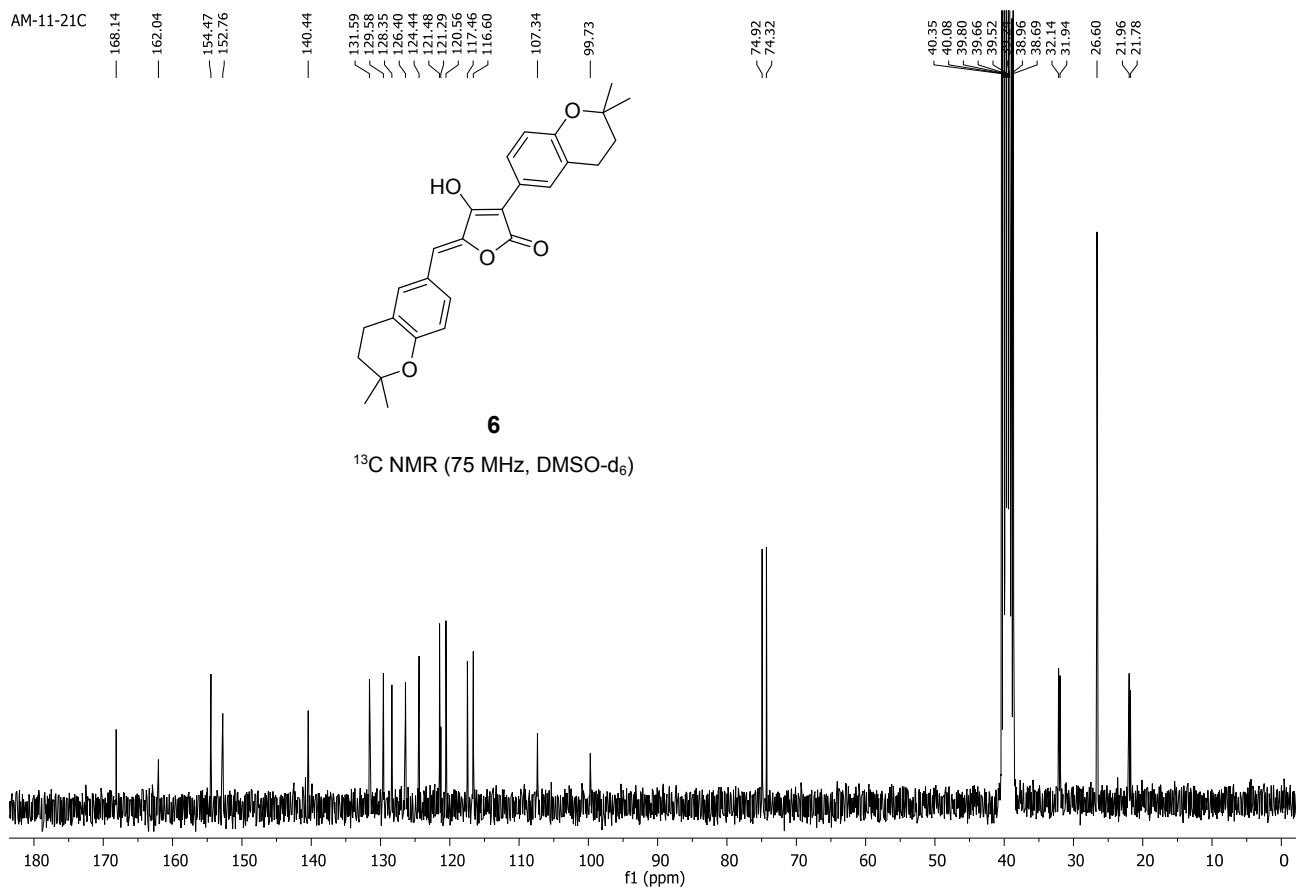

AM-11-105

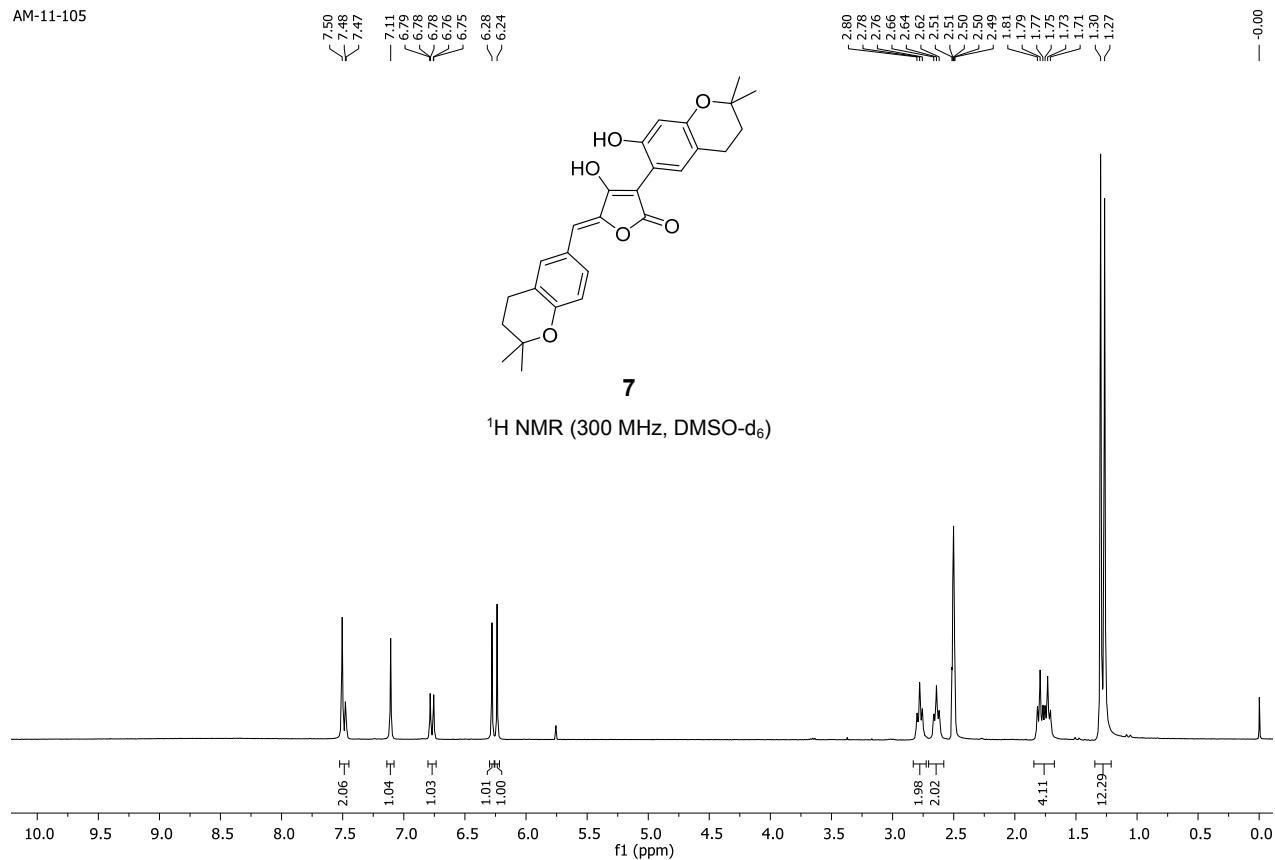

AM-11-105

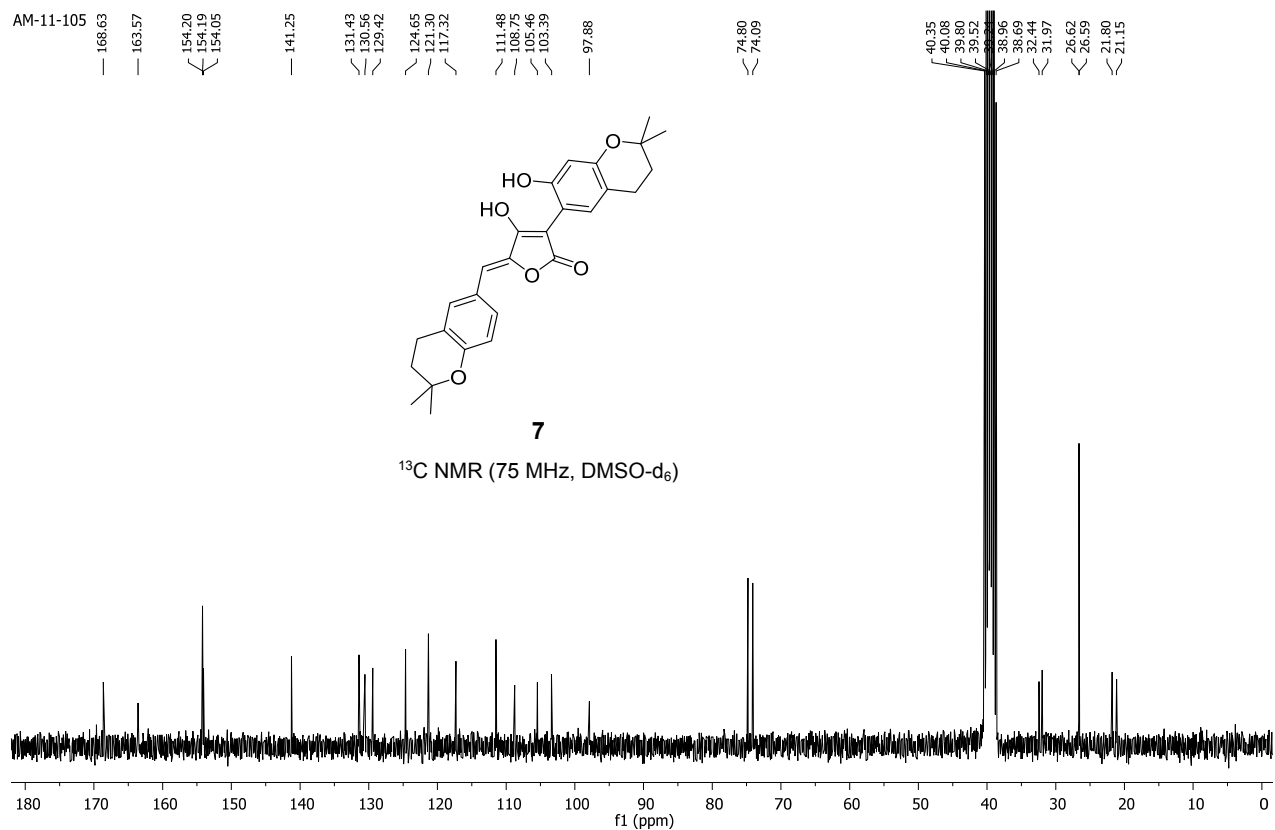

RAA-V-117 pure.1.fid

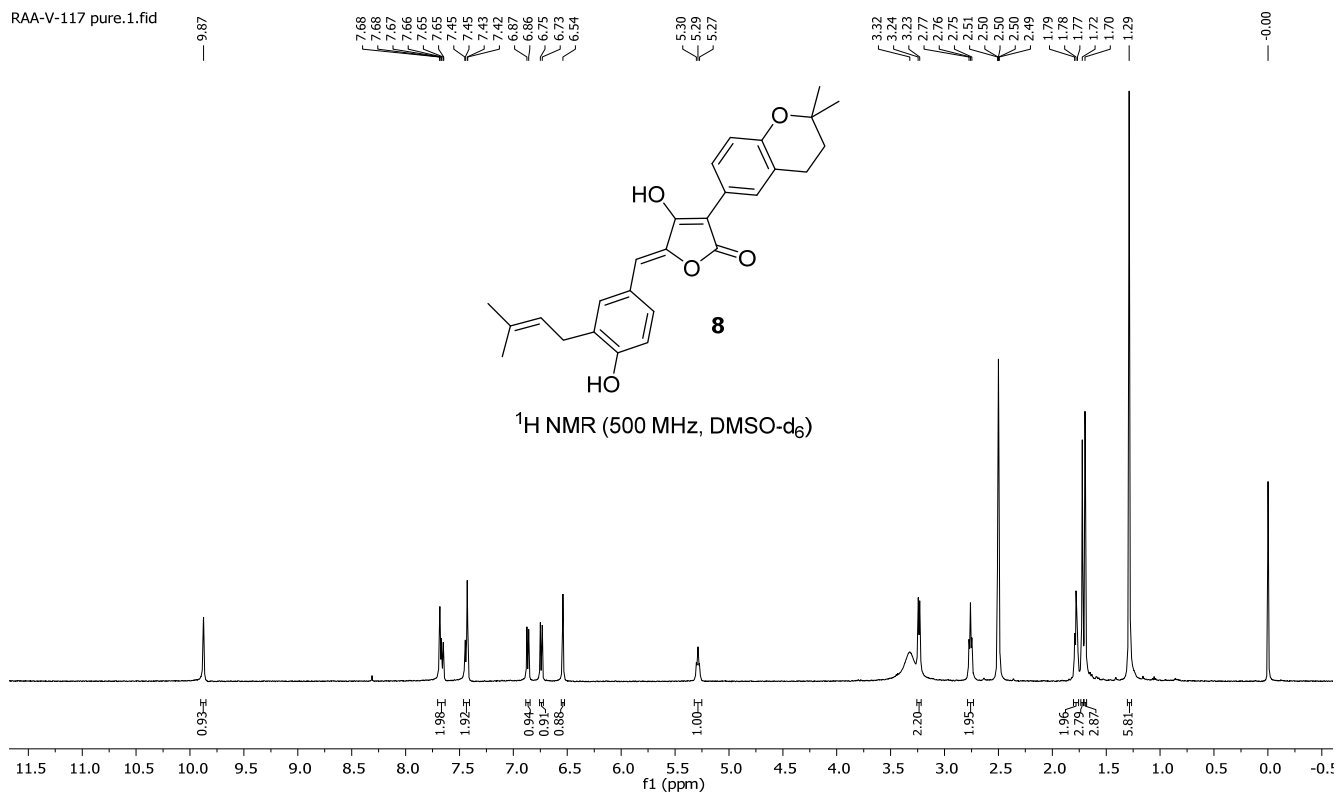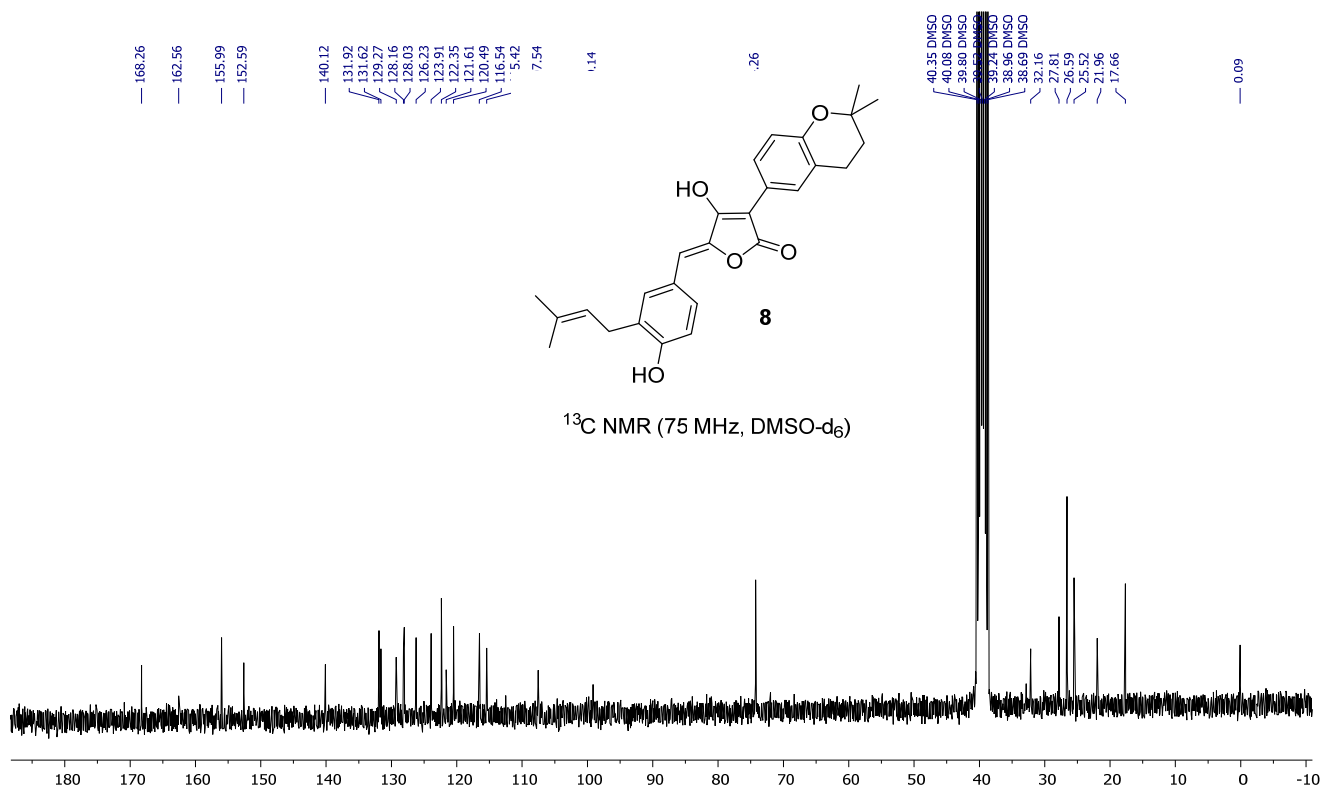

RAA-V-141 pure  
EXP: 1H

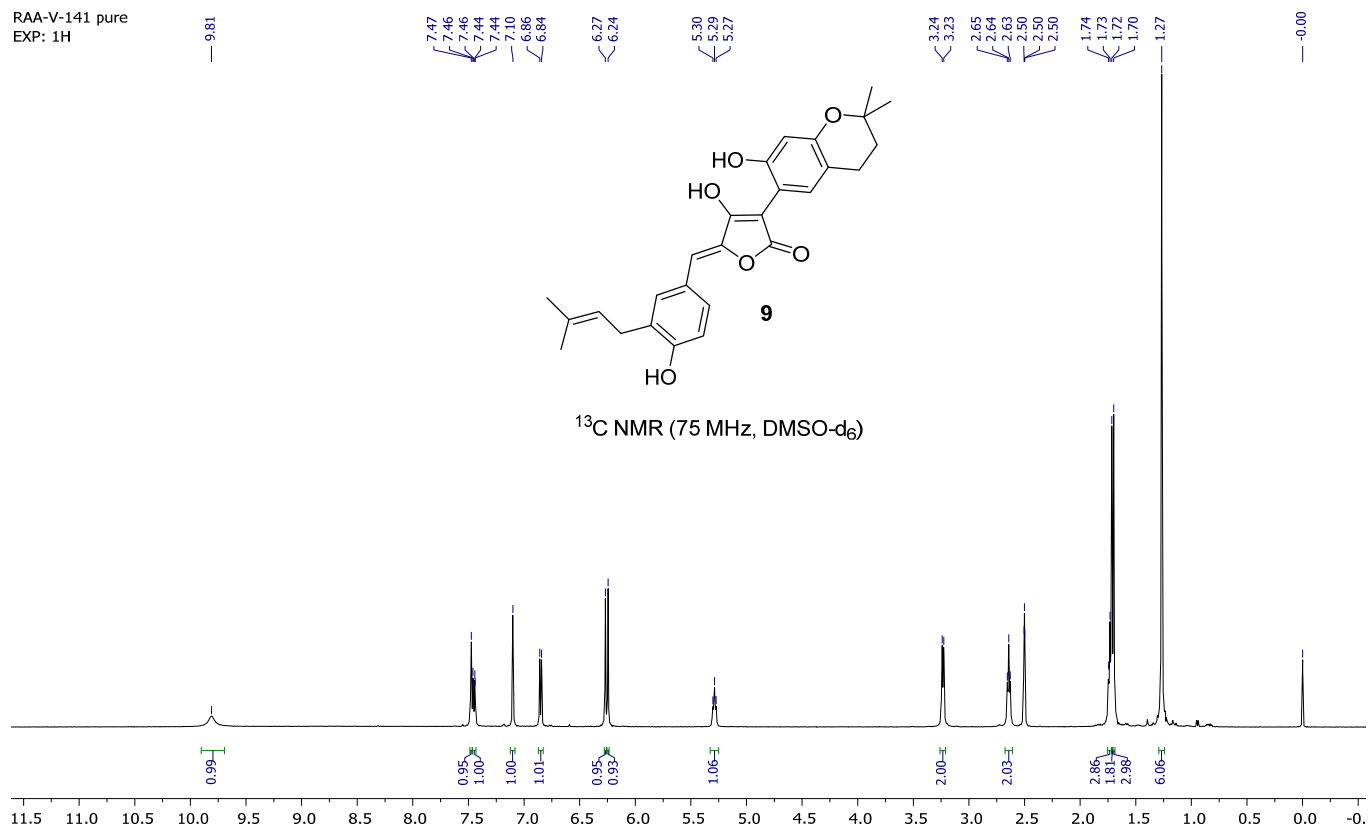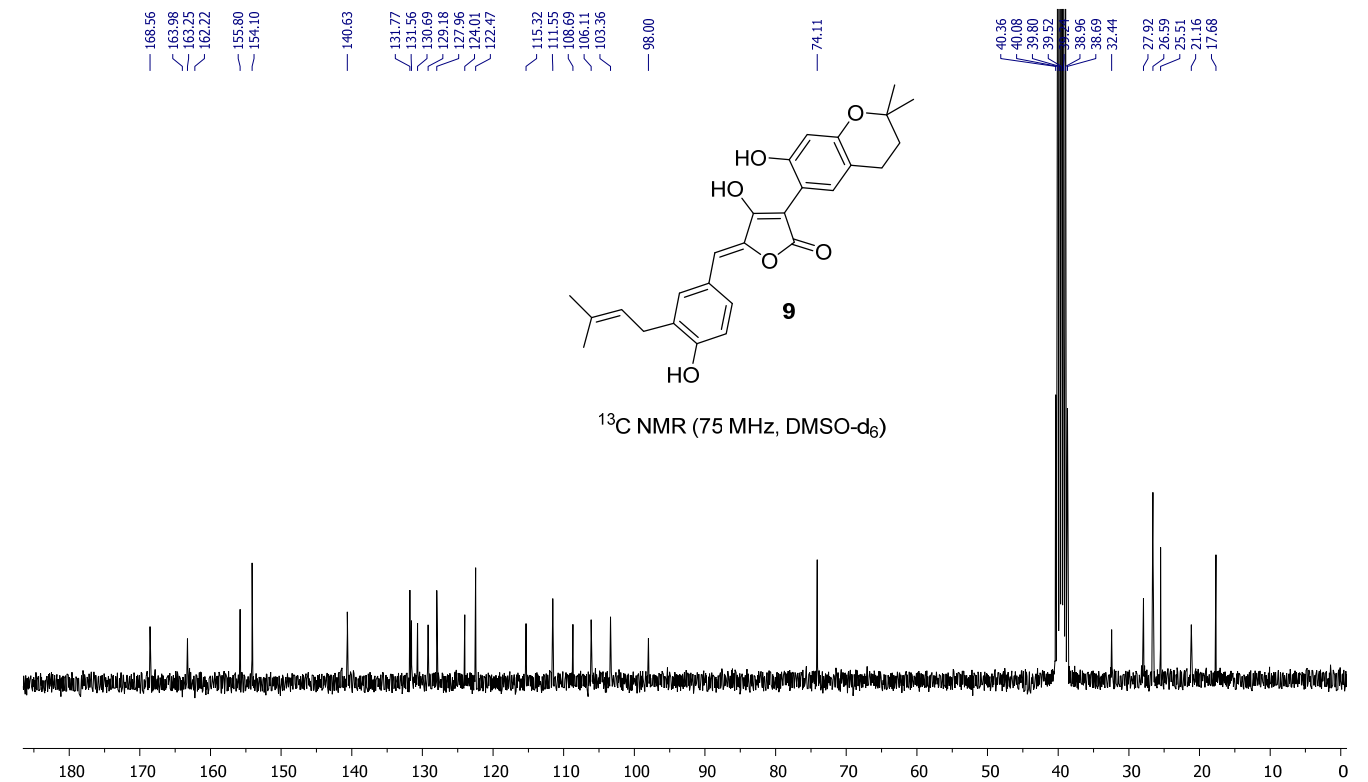

Supplement: c8ob01511b1.pdf [file c8ob01511b1.pdf]
